# Supplementary material for: Vulnerability to fatal drowning among the population in Southern Bangladesh: findings from a cross-sectional household survey
Source: PubMed Central journal article supplement — BMJ Open. 2019 Sep 17;9(9):e027896. doi: 10.1136/bmjopen-2018-027896 (PMC6756443; doi:10.1136/bmjopen-2018-027896), 2019-09-17
Supplement: bmjopen-2018-027896.draft_revisions.pdf [file bmjopen-2018-027896.draft_revisions.pdf]

# BMJ Open

BMJ Open is committed to open peer review. As part of this commitment we make the peer review history of every article we publish publicly available.

When an article is published we post the peer reviewers' comments and the authors' responses online. We also post the versions of the paper that were used during peer review. These are the versions that the peer review comments apply to.

The versions of the paper that follow are the versions that were submitted during the peer review process. They are not the versions of record or the final published versions. They should not be cited or distributed as the published version of this manuscript.

BMJ Open is an open access journal and the full, final, typeset and author-corrected version of record of the manuscript is available on our site with no access controls, subscription charges or pay-per-view fees (<http://bmjopen.bmj.com>).

If you have any questions on BMJ Open's open peer review process please email [info.bmjopen@bmj.com](mailto:info.bmjopen@bmj.com)

# BMJ Open

## Vulnerability to fatal drowning among the population in Southern Bangladesh: findings from the baseline survey of the BHASA project

|                               |                                                                                                                                                                                                                                                                                                                                                                                                                                                                                                                                                                                                                                                                                                                                                                  |
|-------------------------------|------------------------------------------------------------------------------------------------------------------------------------------------------------------------------------------------------------------------------------------------------------------------------------------------------------------------------------------------------------------------------------------------------------------------------------------------------------------------------------------------------------------------------------------------------------------------------------------------------------------------------------------------------------------------------------------------------------------------------------------------------------------|
| Journal:                      | <i>BMJ Open</i>                                                                                                                                                                                                                                                                                                                                                                                                                                                                                                                                                                                                                                                                                                                                                  |
| Manuscript ID                 | bmjopen-2018-027896                                                                                                                                                                                                                                                                                                                                                                                                                                                                                                                                                                                                                                                                                                                                              |
| Article Type:                 | Research                                                                                                                                                                                                                                                                                                                                                                                                                                                                                                                                                                                                                                                                                                                                                         |
| Date Submitted by the Author: | 13-Mar-2019                                                                                                                                                                                                                                                                                                                                                                                                                                                                                                                                                                                                                                                                                                                                                      |
| Complete List of Authors:     | Rahman, Aminur; Centre for Injury Prevention and Research Bangladesh (CIPRB), International Drowning Research Centre - Bangladesh (IDRC-B)<br>Jagnoor, Jagnoor; The George Institute for Global Health, University of Sydney<br>Baset, Kamran; International Drowning Research Centre-Bangladesh (IDRC-B)<br>Ryan, Dan; Royal National Lifeboat Institution, Ahmed, Tahera; International Drowning Research Centre-Bangladesh (IDRC-B)<br>Rogers, Kris; The George Institute for Global Health, University of Sydney<br>Hossain, Mohammad; International Drowning Research Centre-Bangladesh (IDRC-B)<br>Ivers, Rebecca; The George Institute for Global Health, University of Sydney<br>Rahman, AKM; International Drowning Research Centre-Bangladesh (IDRC-B) |
| Keywords:                     | drowning, Fatal drowning, mortality, injury, risk factor, Bangladesh                                                                                                                                                                                                                                                                                                                                                                                                                                                                                                                                                                                                                                                                                             |
|                               |                                                                                                                                                                                                                                                                                                                                                                                                                                                                                                                                                                                                                                                                                                                                                                  |

SCHOLARONE™  
Manuscripts

1  
2  
3 **Vulnerability to fatal drowning among the population in Southern Bangladesh: findings from the**  
4 **baseline survey of the *BHASA* project**  
5  
6  
7  
8

9 Aminur Rahman<sup>1\*</sup>, Jagnoor Jagnoor<sup>2</sup>, Kamran-ul-Baset<sup>1</sup>, Daniel Ryan<sup>3</sup>, Tahera Ahmed<sup>1</sup>, Kris Rogers<sup>2</sup>,  
10 Mohammad Jahangir Hossain<sup>1</sup>, Rebecca Ivers<sup>2</sup>, AKM Fazlur Rahman<sup>1</sup>  
11  
12  
13  
14

15 \*Corresponding Author

16  
17 <sup>1</sup> International Drowning Research Centre – Bangladesh, Centre for Injury Prevention and Research,  
18 Bangladesh  
19

20 Dhaka, Bangladesh

21  
22 House B162, Road No. 23,  
23

24 New DOHS, Mohakhali

25  
26 Dhaka Bangladesh 1206

27  
28 Email: aminur@ciprb.org

29  
30 Phone: +88-02-58814988  
31  
32  
33  
34  
35  
36  
37  
38  
39  
40  
41  
42  
43  
44  
45  
46  
47  
48  
49  
50  
51  
52  
53  
54  
55  
56  
57  
58  
59  
60

<sup>2</sup> The George Institute for Global Health, Injury Division, University of New South Wales, Australia

<sup>3</sup> Royal National Lifeboat Institution(RNLI), Poole, UK

**ABSTRACT**

**Objectives:** To determine the mortality burden and associated risk factors in Southern Bangladesh.

**Settings:** The survey was conducted in 39 sub-districts of all six districts of the Barishal division, Southern Bangladesh.

**Participants:** All residents (over last 6 months) of the Barishal division, Southern Bangladesh.

**Intervention/methods:** A cross-sectional, regionally representative household survey was conducted in all six districts of the Barishal division between September 2016 and February 2017, covering a population of 386,016. Data was collected by face-to-face interview with adult respondents using handheld electronic tablets. Mortality was determined using the ICD 10 codes for drowning W65 – W74, X36 – X39, V90, V92, X71 or X92.

**Results:** The overall drowning mortality in Barishal was 37.9/100,000 population per year (95% CI 31.8–43.9). The highest drowning mortality rate was observed among children 1-4 years (262.2/100,000/year). Mortality rates among males exceeded females (48.2/100,000/year). A higher rate of fatal drowning was found in rural (38.9/100,000/year) compared to urban areas (29.3/100,000/year). Results of the multivariable logistic regression identified that the factors significantly associated with fatal drowning were being male (OR 1.7, 95%CI: 1.2, 2.3), aged 1-4 years (OR 3.0, 95% CI 1.4-6.4) and residing in a household with 4 or more children.

**Conclusion:** The mortality rate for drowning in Bangladesh is known to be one of the highest in the world, in 2016, drowning was the leading cause of death in children 1-4 years. Project *BHASA* was established to implement a coordinated multisectoral program to prevent drowning in the Barishal division of Southern Bangladesh. Prior to the implementation of the programme, a baseline survey was conducted to determine the magnitude of drowning mortality and factors associated with fatal drowning.

**Trial Registry:** Not applicable

**Key words:** Drowning, fatal drowning, mortality, injury, risk factor, Bangladesh

## ARTICLE SUMMARY

### Strengths and limitations of this study

- A key strength of this study was the large regionally-representative sample of Barishal division in Bangladesh, to guide contextual implementation of effective interventions.
- The study used multiple methods for quality control, of significance are the learnings from use of electronic data capture system with low access to internet.
- Limitations included the cross-sectional nature of the study which may have introduced recall bias.
- Under-reporting in overall mortality rates is a concern for children under five years and may have contributed to an under-estimate of the true mortality in this age group

## INTRODUCTION

An estimated 322,149 drowning deaths occur globally every year making drowning a major global health problem[1]. Half of all drowning fatalities in the world occur in people under the age of 25 with the most vulnerable being children aged between 1 – 4 years. More than 90% of drowning incidents take place in low- and middle-income countries (LMICs) where men, women and children have a higher exposure to the risks associated with open water[2]. According to the 2012 WHO Global Health Estimates, the overall mortality rate from drowning globally was 5.2 per 100,000 population with the highest rates observed in the African Region (7.9 per 100,000 population) followed by South-East Asia Region (7.4 per 100,000 population)[2].

The first Bangladesh Health and Injury Survey (BHIS) reported in 2005, identified drowning as the leading cause of death among children 1-17 years with approximately 17,000 children dying each year[3]. In 2016, the BHIS was carried out for the second time and again drowning was found to be the main cause of injury deaths among children aged 1-4 and 5-9 years. According to the 2016 BHIS, 40 children (aged between 0-17 years) lost their life every day from drowning in Bangladesh and this was the highest among all injury fatalities. Among adults (aged 18 years or more) however, there were 13 deaths from drowning per day and this was the sixth leading cause of injury death in that age category[4]. The 2011 Bangladesh Demographic Health Survey (BDHS) found that while the risk of dying from other conditions had significantly decreased, fatalities from drowning among children 1-4 years rose alarmingly from 19% in 2004 to 43% in 2011[5].

Bangladesh is one of the most disaster-prone countries in the world, ranked sixth in the 2015 World Risk Report[6]. It is especially vulnerable to cyclones and frequent riverine and coastal flooding which claim many lives each year[7]. As a riverine country, drowning during inland water transport accidents is also common[8].

1  
2  
3 The 2005 BHIS identified that the highest mortality rate due to drowning occurred in the Pirojpur  
4 district of Barishal division in Bangladesh[3]. Geographically, the division is located in the central  
5  
6 district of Barishal division in Bangladesh where several large rivers converge; with a land mass of 13,644.85  
7  
8 km<sup>2</sup> and a population of 8,147,000. As a low lying, coastal division, Barishal is vulnerable to disaster  
9  
10 and climate change. All six districts under this division are affected by water-related hazards[9].  
11  
12

13  
14  
15 Considering these factors, Project *BHASA*, a Comprehensive Drowning Reduction Strategy was  
16  
17 designed to reduce drowning mortality and morbidity utilizing evidence-based interventions. As part  
18  
19 of this initiative a baseline survey was conducted to determine the burden and context of fatal  
20  
21 drowning in the Barishal division of Bangladesh.  
22  
23

## 24 25 26 27 **METHODS**

28  
29 The *BHASA* baseline survey was a regionally representative population-based cross-sectional survey  
30  
31 of households in rural and urban areas of all sub-districts in the Barishal Division, one of the  
32  
33 country's eight divisions. Geographically, the division is located in the central southern region of  
34  
35 Bangladesh where several large rivers converge. The survey was conducted between September  
36  
37 2016 and February 2017 in 39 sub-districts of all six districts (Barguna, Barishal, Bhola, Jhalokathi,  
38  
39 Patuakhali and Pirojpur) of the Barishal division. The survey covered 95,124 households comprising  
40  
41 of 386, 016 population in the selected sub-districts and used a multi-stage stratified cluster sampling  
42  
43 method.  
44  
45  
46  
47  
48

## 49 **Measures**

50  
51 The operational definition of injury mortality used in this study was in accordance with International  
52  
53 Classification of Disease (ICD), Version 10, Chapter XX recording intent and mechanism of injury [10]  
54  
55 and was defined as, 'any death occurred due to external harm resulting from a fall, burn, cut,  
56  
57 transportation, suffocation, drowning, machine/tool injury, electrocution, animal injury, blunt object  
58  
59  
60

1  
2  
3 injury, poisoning, suicide and violence'. Drowning was described as 'the process of experiencing  
4 respiratory impairment from submersion or immersion in liquid[11]. Drowning deaths were included  
5  
6 if the cause was any of the following external cause codes from Chapter XX ICD-10[10, 12]: codes  
7  
8 W65 – W74 (unintentional drowning), X36 – X39 (exposure to forces of nature –water related, V90  
9  
10 (drowning or submersion due to accident to watercraft), V92 (drowning and submersion due to  
11  
12 accident on board watercraft, without accident to watercraft), X71 (intentional self-harm by  
13  
14 drowning and submersion) or X92 (assault by drowning and submersion while in bath tub).  
15  
16

17  
18 Information on all fatal injuries was collected over a two-year recall period. For all cases of fatal  
19  
20 drowning additional information was collected on potential risk factors such as socio-demographic  
21  
22 characteristics, access to water, and risk factors pre-event, event and post-drowning event,  
23  
24 knowledge, attitudes and perceptions/practices related to drowning, drowning prevention and  
25  
26 disaster preparedness. Information on all mortality, followed by all causes of injury mortality was  
27  
28 collected.  
29  
30  
31  
32  
33  
34

### 35 **Data collection and procedures**

36  
37 Data was collected using a pre-tested structured questionnaire by 50 trained data collectors.  
38  
39 Information was gathered from household heads, mothers or any adults aged of 18 years or above  
40  
41 through face-to-face interviews. Each day data collectors visited 25-30 households to collect  
42  
43 information. Non-participation due to refusal was 2%. To ensure data quality, responsible  
44  
45 supervisors randomly re-surveyed 2% of the households covered over the previous few days on a  
46  
47 daily basis. An electronic data capturing system, the REDCap application, was used on tablets for  
48  
49 data collection[13].  
50  
51  
52  
53  
54

### 55 **Statistical analysis**

56  
57 In this study, to estimate the rates, weights were created for the survey data to appropriately adjust  
58  
59 for differences in probability of selection and response rates according to age and sex. The  
60



1  
2  
3 probability of selection based on sampling information (number of upazilas, number of villages) was  
4  
5 calculated and then adjusted to the age and sex distribution from the 2011 Bangladesh Population  
6  
7 and Housing Census. All data were analysed using SAS 9.4 with SAS/STAT 14.2.  
8  
9

10  
11  
12 While analysing the rates (per 100,000/population) for fatal drowning and percentage for other  
13  
14 variables Taylor Series method was used. This incorporated the survey weights and the other  
15  
16 features of survey design (stratification by district, and cluster sampling of villages). Multivariable  
17  
18 logistic regression was used to examine associations between various socio-demographic factors  
19  
20 with fatal drowning. Missing data was less than 1% for all variables.  
21  
22

### 23 24 25 **Ethical considerations**

26  
27 This study received ethical approvals from the ethical review committee of the Centre for Injury  
28  
29 Prevention and Research, Bangladesh (CIPRB), Bangladesh and the Human Ethics Committee of the  
30  
31 University of Sydney, Australia.  
32  
33

### 34 35 36 **Patient and public involvement statement**

37  
38 This is a community-based household survey, no patients were involved in the study.  
39  
40

### 41 42 **RESULTS**

43  
44  
45 A total of 95,063 households were visited of which 92,616 household representatives (97.4%) were  
46  
47 available for completing the survey. Males and females were equally represented among the  
48  
49 sampled population (49.1% vs 50.9%) and over one-third (37.2%) of the population were children  
50  
51 under-18 years. A total of 4,128 deaths were reported in the two-year recall period, giving an  
52  
53 overall mortality rate of 5.3/100,000 population per year (data not shown).  
54  
55

### 56 57 *Drowning burden and mortality rates* 58 59 60

Drowning accounted for 6.6% of all deaths across all age group, however among children aged 1-4 years drowning was the cause of almost one-third of all deaths (35.1%). One in ten deaths among infants (<1 year) and children aged 5 to 9 years were a result from drowning (data not shown). In the two-year recall period, there were 285 fatal drownings across all ages giving an overall death rate of 37.9/100,000 population per year (95%CI: 31.8, 43.9). Fatal drowning rates were consistently higher among males compared to females across all ages except among those aged 10-14 years where a higher rate was observed among females.

The highest fatal drowning rates were in children aged 1–4 years at 262.2/100,000 per year (95% CI: 216.4, 308.0) followed by infants (88.6/100,000) then children aged 5-9 years (65.1/100,000). In early adolescence (10-14 years) fatal drowning rates decreased but increased again in early adulthood (18-24 years) and among those aged 60 years and over where higher rates of fatal drownings were observed (Table 1).

Table 1. Drowning deaths and mortality rates by age and sex in the Barishal division, Bangladesh

| Sex          | Males                    |                   | Females                  |                 | Both                     |                   | National Rate both sex BHIS 2016 <sup>1</sup> |                  |
|--------------|--------------------------|-------------------|--------------------------|-----------------|--------------------------|-------------------|-----------------------------------------------|------------------|
| AGE (years)  | Rate (per 100,000/ year) | 95% CI (LL, UL)   | Rate (per 100,000/ year) | 95% CI (LL, UL) | Rate (per 100,000/ year) | 95% CI (LL, UL)   | Rate (per 100,000/ year)                      | 95% CI (LL, UL)  |
| <1           | 142.9                    | 22.9, 263.0       | 34.8                     | 0, 81.9         | 88.6                     | 25.4, 151.9       | 53.3                                          | 2.8, 345.8       |
| 1-4          | 325.3                    | 252.6, 398.0      | 199.8                    | 143.1, 256.5    | 262.2                    | 216.4, 308.0      | 71.7                                          | 31.4, 154.8      |
| 5-9          | 78.7                     | 48.9, 108.4       | 51.8                     | 25.1, 78.4      | 65.1                     | 42.4, 87.9        | 28.1                                          | 9.0, 77.3        |
| 10-14        | 9.3                      | 0, 18.8           | 28.2                     | 6.7, 49.8       | 18.9                     | 7.2, 30.5         | 3.2                                           | 0.0, 36.2        |
| 15-17        | 21.1                     | 2.8, 39.3         | -                        | -               | 11.2                     | 1.5, 20.9         | 5.6                                           | 0.0, 63.5        |
| 18-24        | 24.1                     | 0, 52.9           | 10.8                     | 1.3, 20.4       | 17.2                     | 2.9, 31.5         | -                                             | -                |
| 25-39        | 5.2                      | 0, 10.9           | 1.2                      | 0, 3.5          | 3.1                      | 0.1, 6.1          | 2.5                                           | 0.1, 16.2        |
| 40 to 59     | 8.1                      | 0, 18.2           | 3.1                      | 0, 7.4          | 5.6                      | 0.1, 11.1         | 8.6                                           | 1.9, 30.3        |
| 60+          | 22.3                     | 3.6, 40.9         | 3.1                      | 0, 9.1          | 12.6                     | 2.9, 22.2         | 8.8                                           | 0.5, 56.9        |
| <b>Total</b> | <b>48.2</b>              | <b>38.9, 57.4</b> | <b>27.9</b>              | <b>21, 34.9</b> | <b>37.9</b>              | <b>31.8, 43.9</b> | <b>11.7</b>                                   | <b>7.1, 19.0</b> |

<sup>1</sup>Rahman A, Chowdhury SM, Mashrekry SR, Linnan M, Rahman AKMF. (2016) Report on Bangladesh Health and Injury Survey, DGHS, CIPRB, Dhaka.

Fatal drowning rates were higher in rural areas compared to urban areas of the sub-district (38.9/100,000 vs 29.3 per 100,000), and across all age groups except in infancy (<1 year) and early adulthood (18-24 years) where drowning fatality rates were higher in urban areas (Table 2).

Table 2. Distribution rates of fatal drowning by age and region of residence in the Barisal Division, Bangladesh

|              | Rural                     | Urban*                   |
|--------------|---------------------------|--------------------------|
| Age (years)  | Rate per 100,000          | Rate per 100,000         |
| <1 (infant)* | 79.8 (13.6 - 145.9)       | 160.9 (0.0 - 438.2)      |
| 1-4          | 277.2 (225.7 - 328.6)     | 135.4 (40.8 - 230.0)     |
| 5-9          | 68.9 (43.4 - 94.3)        | 31.5 (0.0 - 66.1)        |
| 10-14        | 18.9 (6.4 - 31.3)         | 18.5 (0.0 - 51.8)        |
| 15-17        | 11.5 (0.7 - 22.3)         | 8.6 (0.0 - 25.3)         |
| 18-24        | 11.0 (3.3 - 18.6)         | 65.7 (0.0 - 177.4)       |
| 25-39        | 3.5 (0.2 - 6.9)           | 0                        |
| 40-59        | 6.3 (0.1 - 12.4)          | 0                        |
| 60 +         | 13.9 (3.2 - 24.6)         | 0                        |
| <b>Total</b> | <b>38.9 (32.6 - 45.3)</b> | <b>29.3 (6.5 - 52.1)</b> |

\*The event rate for infants and urban areas are very small, reporting very wide confidence interval

#### *Drowning by type of water body, activity and seasonality*

Across all age categories about three quarters of fatal drowning events occurred within 100 metres of the households. However, among adolescents aged 15-17 years and adults aged 40 years and above over 20% of drowning deaths occurred at a distance of over two kilometres (data not shown). The majority (98%) of drowning deaths took place in the community while less than 1% were related to natural disasters or while using water transportation. Over three-quarters of drowning deaths occurred in ponds and ditches (Figure 1a), and over half were in outdoor water bodies primarily used for bathing and washing (56%) (Figure 1b).

#### **INSERT FIGURE 1**

Drowning occurred throughout the year, however fatalities peaked during the monsoon season (between June to October) particularly in the months of June and September which accounted for nearly one quarter (23.7%) of all drowning deaths (Figure 2).

**INSERT FIGURE 2**

Almost all fatal drownings occurred between the daylight hours of 6 *a.m.* and 6 *p.m.* with two-thirds (63%) taking place between the hours of 9am and 3pm. (Figure 3). Among children aged 1-4 years where most fatal drownings occurred between the hours of 12 *p.m.* and 4 *p.m.* (58%) followed by the morning between 8am to noon (31%) (data not shown).

**INSERT FIGURE 3***Individual involved in rescue*

During fatal drownings, neighbours or bystanders (43.0%) were the individuals most often involved in the rescue, followed by mothers (21.2%). Almost two-thirds (62.3%), of drowned individuals were not accompanied by anyone during the drowning incident, while 15% were accompanied by a friend or colleague (data not shown).

*Factors associated with fatal drowning*

Univariate analyses for fatal drowning showed that children aged 1 to 4 years had almost three times higher odds of drowning deaths compared with those aged under one years. Similarly, households with more than four or more children had almost two times higher odds of experiencing a drowning fatality than households with one child. After adjustment, the factors that remained associated with fatal drowning was age with children aged 1 to 4 years at three times higher odds than those aged less than one year, being male also significantly increased the odds of drowning fatalities by almost 70%. Number of children in the household was also significantly associated with fatal drowning and increased with increasing number of children (Table 3).

Table 3. Socio-demographic factors associated with drowning mortality

| Characteristic                       | Univariate |       |        |         | Multivariable |       |       |         |
|--------------------------------------|------------|-------|--------|---------|---------------|-------|-------|---------|
|                                      | OR         | LCL   | UCL    | p-value | OR            | LCL   | UCL   | p-value |
| <b>Sex</b>                           |            |       |        |         |               |       |       |         |
| Male                                 | 1.724      | 1.281 | 2.319  | 0.0004  | 1.682         | 1.248 | 2.265 | 0.0007  |
| Female                               | reference  |       |        |         | reference     |       |       |         |
| <b>Age group (years)</b>             |            |       |        |         |               |       |       |         |
| <1                                   | reference  |       |        |         | reference     |       |       |         |
| 1-4                                  | 2.969      | 1.398 | 6.306  | <.0001  | 2.983         | 1.399 | 6.358 | <.0001  |
| 5-9                                  | 0.734      | 0.340 | 1.585  | .       | 0.696         | 0.325 | 1.487 | .       |
| 10-14                                | 0.212      | 0.077 | 0.588  | .       | 0.186         | 0.070 | 0.499 | .       |
| 15-17                                | 0.126      | 0.039 | 0.411  | .       | 0.102         | 0.033 | 0.321 | .       |
| 18-24                                | 0.193      | 0.077 | 0.489  | .       | 0.097         | 0.030 | 0.313 | .       |
| 25-39                                | 0.035      | 0.010 | 0.120  | .       | 0.027         | 0.008 | 0.093 | .       |
| 40-59                                | 0.063      | 0.019 | 0.213  | .       | 0.037         | 0.010 | 0.133 | .       |
| 60 +                                 | 0.142      | 0.046 | 0.434  | .       | 0.067         | 0.021 | 0.210 | .       |
| <b>Maternal education</b>            |            |       |        |         |               |       |       |         |
| None                                 | 1.919      | 0.447 | 8.245  |         |               |       |       |         |
| 1 -5 years                           | 2.750      | 0.665 | 11.374 | 0.3372  | .             | .     | .     | .       |
| 6-8 years                            | 2.513      | 0.595 | 10.618 | .       | .             | .     | .     | .       |
| 9-12 years                           | 2.084      | 0.491 | 8.841  | .       | .             | .     | .     | .       |
| 13-17 years                          | reference  |       |        |         | reference     |       |       |         |
| <b>Wealth quintile</b>               |            |       |        |         |               |       |       |         |
| Q1 (Lowest)                          | 1.462      | 0.851 | 2.514  | 0.5147  | 1.279         | 0.759 | 2.157 | 0.8396  |
| Q2                                   | 1.179      | 0.619 | 2.245  | .       | 1.063         | 0.571 | 1.978 | .       |
| Q3                                   | 1.284      | 0.770 | 2.143  | .       | 1.184         | 0.724 | 1.937 | .       |
| Q4                                   | 1.167      | 0.645 | 2.111  | .       | 1.132         | 0.630 | 2.033 | .       |
| Q5 (Highest)                         | reference  |       |        |         | reference     |       |       |         |
| <b>No. of children in household*</b> |            |       |        |         |               |       |       |         |
| 1 child                              | reference  |       |        |         | reference     |       |       |         |
| 2 children                           | 0.916      | 0.593 | 1.415  | 0.6273  | 0.943         | 0.595 | 1.493 | 0.0026  |
| 3 children                           | 0.963      | 0.633 | 1.466  | .       | 1.190         | 0.782 | 1.809 | .       |
| 4 children                           | 1.279      | 0.767 | 2.131  | .       | 1.777         | 1.076 | 2.935 | .       |
| 5+ children                          | 1.384      | 0.790 | 2.423  | .       | 2.092         | 1.181 | 3.705 | .       |

\*Number of household with no children were very small to draw plausible inference

95% CI's

## DISCUSSION

The mortality and morbidity reporting systems in Bangladesh are poor [14]. To inform a large-scale drowning prevention strategy, we conducted a cross-sectional household survey to provide otherwise unavailable epidemiological data on drowning in the Barishal Division. Our study found a mortality rate from drowning of 37.9 per 100,000 per year across all ages in the Barishal division, which is over three times higher than the national rate reported in 2016 (11.7/100,000/year) [4]. The number of water bodies including rivers, lakes, ponds and ditches in this division is far higher than the other parts of the country. For both males and females fatal drowning rates were high in infancy, and peaked at 1-4 years of age, then fell rapidly through middle childhood and adolescence and remained relatively low throughout adulthood. This pattern of fatal drowning rates across the age groups in this study is consistent with another recent national survey[4].

Previous studies identified nearby ponds, ditches, and canals as the most common location of fatal drowning among children in Bangladesh[3, 14-17]. In the Barishal region, most households are surrounded by water bodies, and similar previous studies, the majority of childhood drowning deaths occurred in ponds, ditches and canals situated within only 100 metres from their residences. Children are often with other siblings (children) or unaccompanied at the time of drowning. Lack of supervision in younger children is a major risk factor. Attentiveness and continuity are essential characteristics of the hierarchical model of supervision,[18] proximity to the water exacerbates risk. However, among adults a considerable proportion of drowning fatalities occurred at a distance of two kilometres from their houses. It is possible that these deaths occurred in rivers where individuals were engaged in aquatic activities such as fishing or boating.

Drowning deaths in Barishal occurred year-round but most frequently during the monsoon season (June to October); this is similar to findings reported in prior studies[15, 19-21]. It is also notable that

1  
2  
3 in the dry season (November-December) the fatal drowning rates remained relatively high in  
4  
5 Barishal. This is likely because most natural water bodies including those close to households are  
6  
7 connected to the rivers and given much of the division is subject to semidiurnal tides where  
8  
9 waterbodies are filled twice a day by sea water including the dry season, this can increase the risk of  
10  
11 exposure especially among children playing in these water bodies. Previous studies, have also  
12  
13 reported over 90% of fatal drowning events occurred in daylight hours [14, 22].  
14  
15

16  
17 Fatal drowning was strongly and significantly associated with sex with males having over 1.5 times  
18  
19 the odds of death from drowning. This may be related to males greater engagement in risk taking  
20  
21 behaviours and exposure to high risk situations[23] or to existing traditional gender roles in  
22  
23 Bangladesh with young boys more likely to be out playing unsupervised whereas girls would be at  
24  
25 home helping with household activities. This points to the need to place specific emphasis on  
26  
27 targeting boys within drowning prevention programs. Age was also significantly related to fatal  
28  
29 drowning with those in the age group of 1-4 years having the greatest risk of drowning. This age  
30  
31 group has consistently been found to be at greater risk of drowning in Bangladesh and other South-  
32  
33 East Asian and Western Pacific countries[2, 15, 24] and may be related to lack of adult supervision,  
34  
35 the lack of swimming ability in this age group and other behavioural factors[15]. We did not find any  
36  
37 significant association between mother's education and fatal drowning risk. Socio-economic status  
38  
39 of our study population was fairly homogenous and no associations were reported across the socio-  
40  
41 economic groups. Increased number of children in the household, increased the risk of drowning  
42  
43 events. With some families having often four or five children in the household parents may find it  
44  
45 difficult to adequately supervise all of them. These findings support the need for programmes that  
46  
47 can assist families with supervision.  
48  
49  
50  
51

#### 52 53 **STRENGTHS AND LIMITATIONS OF THE STUDY**

54  
55 The strength of this study was that to ensure the quality of data, trained supervisors were recruited,  
56  
57 and they observed 10% of interviews conducted by the data collectors, checked 10% of the collected  
58  
59  
60

1  
2  
3 data, and re-interviewed 2% of the households. In addition, field level research officers and  
4  
5 managers were appointed to re-check all data for inconsistencies. If inconsistency was detected, the  
6  
7 respective data collector was asked to revisit the household to collect correct information.  
8  
9

10 Given that the mortality burden is highest in children aged under five years, it should be noted that  
11  
12 under-reporting in overall mortality rates is an issue in this age group because of poor birth /vital  
13  
14 registration systems, so our results may have under-estimated the true burden. This is likely to affect  
15  
16 data on children aged under-one year to a larger extent. However, given that a two-year recall  
17  
18 period was used in this survey, the fatal drowning rates are likely to be conservative.  
19  
20

21 The survey was purposively conducted in Barishal division which is one of the eight divisions of  
22  
23 Bangladesh. In previous national injury surveys the highest drowning mortality rate among children  
24  
25 was observed in the Pirojpur district of Barishal division[3]. Considering this high rate the Barishal  
26  
27 division was selected for Project Bhasa.  
28  
29

30  
31 The study findings highlight the very high magnitude of drowning deaths in the Barishal division.  
32  
33 Socio-demographic factors including being male, aged 1-4 years and having five or more children in  
34  
35 households was associated with increased risk of fatal drowning. The findings further demonstrate  
36  
37 that drowning is predominantly a problem that affects children in Bangladesh. The Barishal division  
38  
39 demands urgent interventions targeted at high risk groups identified here. Project Bhasa aims to  
40  
41 provide evidence-based interventions, including community day-care for under-five children to  
42  
43 ensure adult supervision during day time and providing swimming instruction and school water  
44  
45 safety education to children aged five years and over, to reduce drowning. It is expected that the  
46  
47 project will generate knowledge to assist with drowning reduction efforts both nationally and in  
48  
49 other similar settings.  
50  
51  
52  
53  
54  
55  
56  
57  
58  
59  
60



## ACKNOWLEDGEMENTS

This research was a part of “Project BHASA” - a Comprehensive Drowning Reduction Strategy. We thank Royal National Lifeboat Institution (RNLI) UK, The George Institute for Global Health (TGI), Australia and the Directorate General of Health Services (DGHS), Ministry of Health and Family Welfare (MoHFW), Government of the People’s Republic of Bangladesh for their support in the study. We gratefully acknowledge Professor AHM Enayet Hussain, Additional Director General, DGHS, MoHFW to Chair the National Steering Committee for the Project *Bhasa* and also for providing all necessary administrative support to accomplish the baseline survey. We also would like to thank Steve Wills and Ashim Kumar Saha for their contribution during data collection.

## CONTRIBUTORS

AR participated in the design, implementation and supervision of field work and analysis and wrote the paper. JJ contributed on project design, data analysis and writing of the paper. KB and MJH contributed on project design, implementation, Data management and supervision of field work and writing of the paper. DR contributed on project design and writing of the paper. TA and KR were involved in data management and analysis and contributed to write the paper. RI and FR conceived the study and supervised throughout and contributed to the writing of the paper. RI and FR are the guarantors.

## FUNDING

The research was funded by Royal National Life Boat Institution (RNLI), UK

## COMPETING INTERESTS

Authors declare no conflict of interest.

## ETHICAL APPROVAL

Obtained

## PROVENANCE AND PEER REVIEW

Not commissioned; externally peer reviewed.

## DATA SHARING STATEMENT

Additional de-identified data is available on request to the study steering committee.

Figure 1: *Distribution of fatal drowning by type of water bodies (1a) and their use (1b)*

Figure 2: *Distribution of fatal drowning by time of the year in Barishal Division, Bangladesh*

Figure 3: *Distribution of fatal drowning by time of the day in Barishal Division, Bangladesh*

## REFERENCES

1. World Health Organisation, *Global Health Estimates 2016: Deaths by Cause, Age, Sex, by Country and by Region, 2000-2016*. 2016, World Health Organization: Geneva, Switzerland.
2. World Health Organisation, *Global report on drowning: preventing a leading killer*. 2014, The World Health Organisation (WHO): Geneva, Switzerland.
3. Rahman, A., et al., *Bangladesh Health and Injury Survey Report on Children*. 2005, Directorate General of Health Services (DGHS), Ministry of Health & Family Welfare (MOHFW), Government of the People's Republic of Bangladesh, Institute of Child & Mother Health (ICMH), United Nations Children's Fund (UNICEF), The Alliance for Safe Children (TASC): Dhaka, Bangladesh.
4. Rahman, A., *Bangladesh Health and Injury Survey Report on Children 2016*. (unpublished), Centre for Injury Prevention and Research, Bangladesh: Dhaka, Bangladesh.
5. NIPORT, Mitra and Associates, and ICF International, *Bangladesh Demographic and Health Survey 2011* 2013, NIPORT, Mitra and Associates, and ICF International: Dhaka, Bangladesh and Calverton, Maryland, USA.
6. UNU-EHS and Bündnis Entwicklung Hilft, *World Risk Report 2015*. 2015, Bündnis Entwicklung Hilft (Alliance Development Works) and United Nations University – Institute for Environment and Human Security (UNU-EHS): Berlin.
7. Department of Disaster Management Bangladesh, *Disaster Report 2013*. 2015, Department of Disaster Management, Ministry of Disaster Management and Relief, Government of the People's Republic of Bangladesh: Dhaka, Bangladesh.
8. Azad, A., *Riverine Passenger Vessel Disaster in Bangladesh: Options for Mitigation and Safety*. 2009, BRAC University: Dhaka, Bangladesh.

- 1
  - 2
  - 3
  - 4
  - 5
  - 6
  - 7
  - 8
  - 9
  - 10
  - 11
  - 12
  - 13
  - 14
  - 15
  - 16
  - 17
  - 18
  - 19
  - 20
  - 21
  - 22
  - 23
  - 24
  - 25
  - 26
  - 27
  - 28
  - 29
  - 30
  - 31
  - 32
  - 33
  - 34
  - 35
  - 36
  - 37
  - 38
  - 39
  - 40
  - 41
  - 42
  - 43
  - 44
  - 45
  - 46
  - 47
  - 48
  - 49
  - 50
  - 51
  - 52
  - 53
  - 54
  - 55
  - 56
  - 57
  - 58
  - 59
  - 60
9. IWM, *Policy Brief: Local Level Hazard Maps for Flood, Storm, Surge and Salinity*. 2014, Institute of Water Modelling (IWM): Dhaka, Bangladesh.
10. World Health Organisation, *International Statistical Classification of Diseases and Related Health Problems 10th Revision (ICD-10)*. 2016, The World Health Organization: Geneva, Switzerland.
11. van Beeck, E.F., et al., *A new definition of drowning: towards documentation and prevention of a global public health problem*. Bull World Health Organ, 2005. **83**(11): p. 853-6.
12. Passmore, J.W., J.O. Smith, and A. Clapperton, *True burden of drowning: compiling data to meet the new definition*. International Journal of Injury Control and Safety Promotion, 2007. **14**(1): p. 1-3.
13. Harris, P., et al., *Research Electronic Data Capture (REDCap) - A metadata driven methodology and workflow process for providing translational research informatic support*. J Biomed Inform., 2009. **42**(2): p. 377–81.
14. Rahman, A., et al., *Epidemiology of Drowning in Bangladesh: An Update*. Int J Environ Res Public Health, 2017. **14**(5): p. 1-11.
15. Rahman, A., et al., *Analysis of the childhood fatal drowning situation in Bangladesh: exploring prevention measures for low-income countries*. Inj Prev, 2009. **15**(2): p. 75-9.
16. Ahmed, M.K., M. Rahman, and J. van Ginneken, *Epidemiology of child deaths due to drowning in Matlab, Bangladesh*. Int J Epidemiol, 1999. **28**(2): p. 306-11.
17. Hyder, A.A., et al., *Death from drowning: defining a new challenge for child survival in Bangladesh*. Inj Control Saf Promot, 2003. **10**(4): p. 205-10.
18. Saluja, G., et al., *The role of supervision in child injury risk: definition, conceptual and measurement issues*. Inj. Control Saf. Promot., 2004. **11**: p. 17–22.
19. Rahman, F., et al., *Cost-effectiveness of an injury and drowning prevention program in Bangladesh*. Pediatrics, 2012. **130**(6): p. e1621-e1628.
20. Linnan, M., et al., *Child Mortality and Injury in Asia: Survey results and evidence*, in *Innocenti Working Paper 2007-06, Special Series on Child Injury No. 3*. 2007, UNICEF Innocenti Research Centre: Florence. p. 64-87.
21. Rahman F, Andersson R, and S. L., *Health Impact of Injuries: A Population-Based Epidemiological Investigation in a Local Community of Bangladesh*. J Safety Res, 1998. **29**(4): p. 213-22.
22. Hossain, M., et al., *Socio-demographic, environmental and caring risk factors for childhood drowning deaths in Bangladesh*. BMC Pediatr, 2015. **15**: p. 114.
23. Croft, J.L. and C. Button, *Interacting Factors Associated with Adult Male Drowning in New Zealand*. PLoS One, 2015. **10**(6): p. e0130545.
24. Yang, L., et al., *Risk factors for childhood drowning in rural regions of a developing country: a case-control study*. Injury prevention, 2007. **13**(3): p. 178-182.

1  
2  
3  
4  
5  
6  
7  
8  
9  
10  
11  
12  
13  
14  
15  
16  
17  
18  
19  
20  
21  
22  
23  
24  
25  
26  
27  
28  
29  
30  
31  
32  
33  
34  
35  
36  
37  
38  
39  
40  
41  
42  
43  
44  
45  
46  
47  
48  
49  
50  
51  
52  
53  
54  
55  
56  
57  
58  
59  
60

For peer review only

1  
2  
3  
4  
5  
6  
7  
8  
9  
10  
11  
12  
13  
14  
15  
16  
17  
18  
19  
20  
21  
22  
23  
24  
25  
26  
27  
28  
29  
30  
31  
32  
33  
34  
35  
36  
37  
38  
39  
40  
41  
42  
43  
44  
45  
46  
47  
48  
49  
50  
51  
52  
53  
54  
55  
56  
57  
58  
59  
60

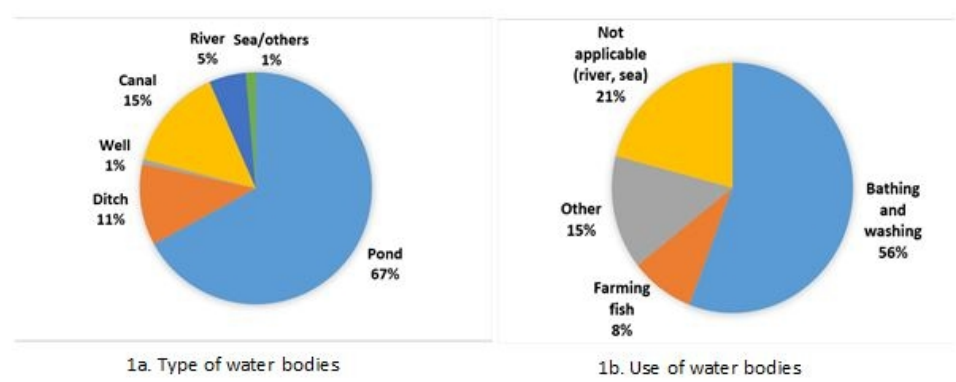

Figure 1: Distribution of fatal drowning by type of water bodies (1a) and their use (1b)

Figure 1: Distribution of fatal drowning by type of water bodies (1a) and their use (1b)

166x94mm (96 x 96 DPI)

I

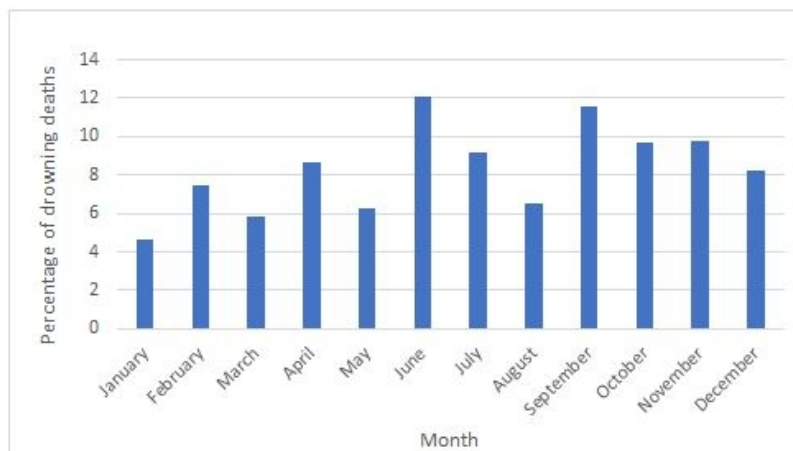

Figure 2. Distribution of fatal drowning by time of the year in Barishal Division, Bangladesh

Figure 2. Distribution of fatal drowning by time of the year in Barishal Division, Bangladesh

160x97mm (96 x 96 DPI)

1  
2  
3  
4  
5  
6  
7  
8  
9  
10  
11  
12  
13  
14  
15  
16  
17  
18  
19  
20  
21  
22  
23  
24  
25  
26  
27  
28  
29  
30  
31  
32  
33  
34  
35  
36  
37  
38  
39  
40  
41  
42  
43  
44  
45  
46  
47  
48  
49  
50  
51  
52  
53  
54  
55  
56  
57  
58  
59  
60

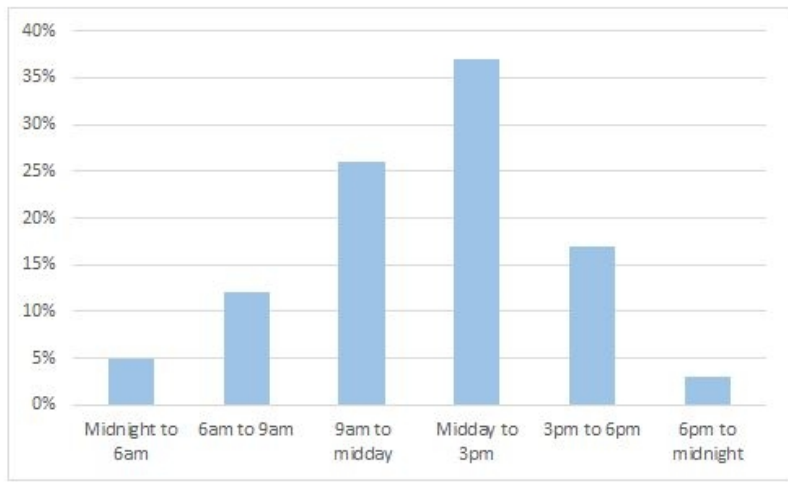

Figure 3. Distribution of fatal drowning by time of the day in Barishal Division, Bangladesh

Figure 3. Distribution of fatal drowning by time of the day in Barishal Division, Bangladesh  
162x97mm (96 x 96 DPI)

# BMJ Open

## Vulnerability to fatal drowning among the population in Southern Bangladesh: findings from a cross-sectional household survey

|                                 |                                                                                                                                                                                                                                                                                                                                                                                                                                                                                                                                                                                                                                                                                                                                                                     |
|---------------------------------|---------------------------------------------------------------------------------------------------------------------------------------------------------------------------------------------------------------------------------------------------------------------------------------------------------------------------------------------------------------------------------------------------------------------------------------------------------------------------------------------------------------------------------------------------------------------------------------------------------------------------------------------------------------------------------------------------------------------------------------------------------------------|
| Journal:                        | <i>BMJ Open</i>                                                                                                                                                                                                                                                                                                                                                                                                                                                                                                                                                                                                                                                                                                                                                     |
| Manuscript ID                   | bmjopen-2018-027896.R1                                                                                                                                                                                                                                                                                                                                                                                                                                                                                                                                                                                                                                                                                                                                              |
| Article Type:                   | Original research                                                                                                                                                                                                                                                                                                                                                                                                                                                                                                                                                                                                                                                                                                                                                   |
| Date Submitted by the Author:   | 09-May-2019                                                                                                                                                                                                                                                                                                                                                                                                                                                                                                                                                                                                                                                                                                                                                         |
| Complete List of Authors:       | Rahman, Aminur; Centre for Injury Prevention and Research Bangladesh (CIPRB), International Drowning Research Centre - Bangladesh (IDRC-B)<br>Jagnoor, Jagnoor; The George Institute for Global Health, University of Sydney<br>Baset, Kamran; International Drowning Research Centre-Bangladesh (IDRC-B)<br>Ryan, Dan; Royal National Lifeboat Institution,<br>Ahmed, Tahera; International Drowning Research Centre-Bangladesh (IDRC-B)<br>Rogers, Kris; The George Institute for Global Health, University of Sydney<br>Hossain, Mohammad; International Drowning Research Centre-Bangladesh (IDRC-B)<br>Ivers, Rebecca; The George Institute for Global Health, University of Sydney<br>Rahman, AKM; International Drowning Research Centre-Bangladesh (IDRC-B) |
| <b>Primary Subject Heading</b>: | Public health                                                                                                                                                                                                                                                                                                                                                                                                                                                                                                                                                                                                                                                                                                                                                       |
| Secondary Subject Heading:      | Epidemiology                                                                                                                                                                                                                                                                                                                                                                                                                                                                                                                                                                                                                                                                                                                                                        |
| Keywords:                       | drowning, Fatal drowning, mortality, injury, risk factor, Bangladesh                                                                                                                                                                                                                                                                                                                                                                                                                                                                                                                                                                                                                                                                                                |
|                                 |                                                                                                                                                                                                                                                                                                                                                                                                                                                                                                                                                                                                                                                                                                                                                                     |

SCHOLARONE™  
Manuscripts



1  
2  
3 **Vulnerability to fatal drowning among the population in Southern Bangladesh: findings**  
4 **from a cross-sectional household survey**  
5  
6  
7

8 Aminur Rahman<sup>1\*</sup>, Jagnoor Jagnoor<sup>2</sup>, Kamran-ul-Baset<sup>1</sup>, Daniel Ryan<sup>3</sup>, Tahera Ahmed<sup>1</sup>, Kris Rogers<sup>2</sup>,  
9 Mohammad Jahangir Hossain<sup>1</sup>, Rebecca Ivers<sup>2</sup>, AKM Fazlur Rahman<sup>1</sup>  
10  
11  
12  
13  
14  
15

16 \*Corresponding Author

17  
18 <sup>1</sup> International Drowning Research Centre – Bangladesh, Centre for Injury Prevention and Research,  
19 Bangladesh  
20

21 Dhaka, Bangladesh

22  
23 House B162, Road No. 23,  
24

25 New DOHS, Mohakhali

26  
27 Dhaka Bangladesh 1206

28  
29 Email: aminur@ciprb.org

30  
31 Phone: +88-02-58814988  
32  
33  
34  
35

36 <sup>2</sup> The George Institute for Global Health, Injury Division, University of New South Wales, Australia

37  
38 <sup>3</sup> Royal National Lifeboat Institution(RNLI), Poole, UK  
39  
40  
41  
42  
43  
44  
45  
46  
47  
48  
49  
50  
51  
52  
53  
54  
55  
56  
57  
58  
59  
60

**ABSTRACT**

**Objectives:** To determine the drowning mortality burden and associated risk factors in Southern Bangladesh.

**Settings:** The survey was conducted in 39 sub-districts of all six districts of the Barishal division, Southern Bangladesh.

**Participants:** All residents (residing over last 6 months) of the Barishal division, Southern Bangladesh.

**Intervention/methods:** A cross-sectional, divisionally representative household survey was conducted in all six districts of the Barishal division between September 2016 and February 2017, covering a population of 386,016. Data was collected by face-to-face interview with adult respondents using handheld electronic tablets. Mortality was determined using the ICD 10 codes for drowning W65 – W74, X36 – X39, V90, V92, X71 or X92.

**Results:** The overall drowning mortality in Barishal was 37.9/100,000 population per year (95% CI 31.8–43.9). The highest drowning mortality rate was observed among children 1-4 years (262.2/100,000/year). Mortality rates among males (48.2/100,000/year) exceeded females. A higher rate of fatal drowning was found in rural (38.9/100,000/year) compared to urban areas (29.3/100,000/year). Results of the multivariable logistic regression identified that the factors significantly associated with fatal drowning were being male (OR 1.7, 95% CI: 1.2 - 2.3), aged 1-4 years (OR 3.0, 95% CI 1.4 - 6.4) and residing in a household with 4 or more children (4 year old children OR 1.8, 1.1 – 2.9; and 5 year old children OR 2.1, 1.2 – 3.7).

**Conclusion:** Drowning is a public health problem, especially for children, in the Barishal division of Southern Bangladesh. Male gender, children 1-4 years of age and residing in a household with 4 or more children were associated with increased risk of fatal drowning events. The Barishal division demands urgent interventions targeted at high risk groups identified in the survey.

**Trial Registry:** Not applicable

**Key words:** Drowning, fatal drowning, mortality, injury, risk factor, Bangladesh

**ARTICLE SUMMARY****Strengths and limitations of this study**

- A key strength of this study was the large divisionally-representative sample of Barishal division in Bangladesh, to guide contextual implementation of effective interventions.
- The study used multiple methods for quality control, of significance are the learnings from use of electronic data capture system with low access to internet.
- Limitations included the cross-sectional nature of the study which may have introduced recall bias.
- Under-reporting in overall mortality rates is a concern for children under five years and may have contributed to an under-estimate of the true mortality in this age group.

## INTRODUCTION

An estimated 322,149 drowning deaths occur globally every year making drowning a major global health problem[1]. Half of all drowning fatalities occur in people under the age of 25 with children aged between 1 – 4 years most vulnerable. More than 90% of drowning incidents take place in low- and middle-income countries (LMICs) where men, women and children have a higher exposure to the risks associated with open water[2]. According to the 2012 WHO Global Health Estimates, the overall mortality rate from drowning globally was 5.2 per 100,000 population with the highest rates observed in the African Region (7.9 per 100,000 population) followed by South-East Asia Region (7.4 per 100,000 population)[2].

In 2005, the first Bangladesh Health and Injury Survey (BHIS), identified drowning as the leading cause of death among children 1-17 years with approximately 17,000 children dying each year[3]. In 2016, the BHIS was carried out for the second time and again drowning was found to be the main cause of injury deaths among children aged 1-4 and 5-9 years. According to the 2016 BHIS, every day 40 children (aged between 0-17 years) lost their life every day due to drowning and this was the highest among all injury fatalities. Among adults (aged 18 years or more) there were 13 deaths from drowning per day and this was the sixth leading cause of injury death in that age category[4]. The 2011 Bangladesh Demographic Health Survey (BDHS) found that while the risk of dying from other conditions, such as vaccine preventable communicable diseases, had significantly decreased, fatalities from drowning among children aged 1-4 years rose alarmingly from 19.0% in 2004 to 43.0% in 2011[5].

Bangladesh is a highly disaster prone country, ranked sixth in the 2015 World Risk Report[6]. It is especially vulnerable to cyclones and frequent flooding which claim many lives each year[7]. The country is intersected by many rivers, drowning during inland water transport accidents is also common[8].

1  
2  
3 The 2005 BHIS identified that the highest mortality rate due to drowning occurred in the Pirojpur  
4 district of Barishal division in Bangladesh[3]. Geographically, the Barishal division is located in the  
5  
6 central southern region of Bangladesh where several large rivers converge; with a land mass of  
7  
8 13,644.85 km<sup>2</sup> and a population of 8,147,000. As a low lying, coastal division, Barishal is vulnerable  
9  
10 to natural hazards and the effects of climate change. All six districts under this division are affected  
11  
12 by water-related hazards[9].  
13  
14  
15

16  
17 Considering these factors, Project *Bhasa*, a Comprehensive Drowning Reduction Strategy was  
18  
19 designed to reduce drowning mortality and morbidity utilizing evidence-based interventions. As part  
20  
21 of this initiative a baseline survey was conducted to determine the burden and context of drowning  
22  
23 in the Barishal division of Southern Bangladesh.  
24  
25  
26  
27  
28

## 29 **METHODS**

30  
31 The *Bhasa* baseline survey was a population-based cross-sectional survey representative to the  
32  
33 Barishal Division, one of the country's eight divisions. Geographically, the division is located in the  
34  
35 central southern region of Bangladesh where several large rivers converge. The survey was  
36  
37 conducted between September 2016 and February 2017 in 39 sub-districts of all six districts  
38  
39 (Barguna, Barishal, Bhola, Jhalokathi, Patuakhali and Pirojpur) of the division (Fig. 1). The survey  
40  
41 covered 95,124 households comprising 386, 016 population in the selected sub-districts and used a  
42  
43 multi-stage stratified cluster sampling method.  
44  
45  
46  
47  
48

## 49 **INSERT Figure 1: Map of the Barishal division – the study area**

### 50 51 52 53 **Measures**

54  
55 The operational definition of injury mortality used in this study was in accordance with International  
56  
57 Classification of Disease (ICD), Version 10, Chapter XX recording intent and mechanism of injury [10]  
58  
59  
60

1  
2  
3 and was defined as, 'any death occurred due to external harm resulting from a fall, burn, cut,  
4 transportation, suffocation, drowning, machine/tool injury, electrocution, animal injury, blunt object  
5 injury, poisoning, suicide and violence'. Drowning was described as 'the process of experiencing  
6 respiratory impairment from submersion or immersion in liquid'[11]. Drowning deaths were  
7 included if the cause was any of the following external cause codes from Chapter XX ICD-10[10, 12]:  
8 codes W65 – W74 (unintentional drowning), X36 – X39 (exposure to forces of nature –water related,  
9 V90 (drowning or submersion due to accident to watercraft), V92 (drowning and submersion due to  
10 accident on board watercraft, without accident to watercraft), X71 (intentional self-harm by  
11 drowning and submersion) or X92 (assault by drowning and submersion while in bath tub).  
12  
13  
14  
15  
16  
17  
18  
19  
20  
21  
22  
23

24 Information on all fatal injuries was collected over a two-year recall period. For all cases of fatal  
25 drowning additional information was collected on potential risk factors such as socio-demographic  
26 characteristics, access to water, and risk factors pre-event (e.g. location and type of water body,  
27 activity of the person prior to drowning, person accompanying prior to drowning, accompanying  
28 person's age) , event (e.g. time and season of drowning) and post-drowning event (e.g. time of  
29 rescue, person rescued, action taken after rescue), knowledge, attitudes and practices related to  
30 drowning, drowning prevention and disaster preparedness. Information on all mortality, followed by  
31 all causes of injury mortality was collected.  
32  
33  
34  
35  
36  
37  
38  
39  
40  
41  
42  
43  
44  
45

#### 46 **Data collection and procedures**

47 Data was collected using a pre-tested structured questionnaire by 50 trained data collectors.  
48 Information was gathered from household heads, mothers or any residing adults aged 18 years or  
49 older through face-to-face interviews after obtaining written informed consent. Each selected  
50 respondent provided information of all household members including children. Each day data  
51 collectors visited 25-30 households to collect information. Non-participation due to refusal was  
52 2.0%. To ensure data quality, responsible supervisors randomly re-surveyed 2.0% of the households.  
53  
54  
55  
56  
57  
58  
59  
60

1  
2  
3 An electronic data capturing tool using the REDCap application, was used on tablets for data  
4  
5 collection[13].  
6  
7  
8  
9

### 10 **Statistical analysis**

11  
12 In this study, to estimate the rates, weights were created for the survey data to appropriately adjust  
13  
14 for differences in probability of selection and response rates according to age and sex. The  
15  
16 probability of selection based on sampling information (number of upazilas, number of villages) was  
17  
18 calculated and then adjusted to the age and sex distribution from the 2011 Bangladesh Population  
19  
20 and Housing Census. All data were analysed using SAS 9.4 with SAS/STAT 14.2.  
21  
22  
23  
24

25 While analysing the rates (per 100,000/population) for fatal drowning and percentage for other  
26  
27 variables Taylor Series method was used. This incorporated the survey weights and the other  
28  
29 features of survey design (stratification by district, and cluster sampling of villages). Multivariable  
30  
31 logistic regression was used to examine associations between various socio-demographic factors  
32  
33 with fatal drowning. Less than 1.0% of variables had missing data.  
34  
35  
36  
37  
38

### 39 **Ethical considerations**

40  
41 This study received ethical approvals from the ethical review committee of the Centre for Injury  
42  
43 Prevention and Research, Bangladesh (CIPRB), Bangladesh and the Human Ethics Committee of the  
44  
45 University of Sydney, Australia. The ethics approval numbers were CIPRB/ERC/2016/12 and USyd  
46  
47 HREC - 2016/606 respectively.  
48  
49  
50  
51

### 52 **Patient and public involvement statement**

53  
54  
55 This is a community-based household survey, no patients were involved in the study.  
56  
57  
58  
59  
60

## RESULTS

A total of 95,063 households were visited of which 92,616 household representatives (97.4%) completed the survey. Males and females were equally represented among the sampled population (49.1% vs 50.9%) and over one-third (37.2%) of the population were children under-18 years. A total of 4,128 deaths were reported in the two-year recall period, giving an overall mortality rate of 5.3/100,000 population per year (data not shown).

### *Drowning burden and mortality rates*

Drowning accounted for 6.6% of deaths across all age group, however among children aged 1-4 years drowning was the cause of almost one-third of all deaths (35.1%). One in ten deaths among infants (<1 year) and children aged 5 to 9 years were a result from drowning (data not shown). In the two-year recall period, there were 285 fatal drownings across all ages giving an all-age drowning mortality rate of 37.9/100,000 population per year (95%CI: 31.8 - 43.9). All fatal drownings were found unintentional. Fatal drowning rates were consistently higher among males compared to females across all ages except among those aged 10-14 years where a higher rate was observed among females. However, this higher rate among 10-14 year girls was not statistically significant.

The highest fatal drowning rates were in children aged 1-4 years at 262.2/100,000 per year (95% CI: 216.4 - 308.0) followed by infants (88.6/100,000) then children aged 5-9 years (65.1/100,000). In early adolescence (10-14 years) fatal drowning rates decreased but increased again in early adulthood (18-24 years) and among those aged 60 years and over where higher rates of fatal drownings were observed (Table 1).



Table 1. Drowning deaths and mortality rates by age and sex in the Barishal division, Bangladesh

| Sex          | Males                    |                    | Females                  |                  | Both                     |                    | National Rate both sex BHIS 2016 <sup>1</sup> |                  |
|--------------|--------------------------|--------------------|--------------------------|------------------|--------------------------|--------------------|-----------------------------------------------|------------------|
| AGE (years)  | Rate (per 100,000/ year) | 95% CI (LL - UL)   | Rate (per 100,000/ year) | 95% CI (LL - UL) | Rate (per 100,000/ year) | 95% CI (LL - UL)   | Rate (per 100,000/ year)                      | 95% CI (LL - UL) |
| <1           | 142.9                    | 22.9 - 263.0       | 34.8                     | 0 - 81.9         | 88.6                     | 25.4 - 151.9       | 53.3                                          | 2.8 - 345.8      |
| 1-4          | 325.3                    | 252.6 - 398.0      | 199.8                    | 143.1 - 256.5    | 262.2                    | 216.4 - 308.0      | 71.7                                          | 31.4 - 154.8     |
| 5-9          | 78.7                     | 48.9 - 108.4       | 51.8                     | 25.1 - 78.4      | 65.1                     | 42.4 - 87.9        | 28.1                                          | 9.0 - 77.3       |
| 10-14        | 9.3                      | 0 - 18.8           | 28.2                     | 6.7 - 49.8       | 18.9                     | 7.2 - 30.5         | 3.2                                           | 0.0 - 36.2       |
| 15- 17       | 21.1                     | 2.8 - 39.3         | -                        | -                | 11.2                     | 1.5 - 20.9         | 5.6                                           | 0.0 - 63.5       |
| 18-24        | 24.1                     | 0 - 52.9           | 10.8                     | 1.3 - 20.4       | 17.2                     | 2.9 - 31.5         | -                                             |                  |
| 25-39        | 5.2                      | 0 - 10.9           | 1.2                      | 0 - 3.5          | 3.1                      | 0.1 - 6.1          | 2.5                                           | 0.1 - 16.2       |
| 40 to 59     | 8.1                      | 0 - 18.2           | 3.1                      | 0 - 7.4          | 5.6                      | 0.1 - 11.1         | 8.6                                           | 1.9 - 30.3       |
| 60+          | 22.3                     | 3.6 - 40.9         | 3.1                      | 0 - 9.1          | 12.6                     | 2.9 - 22.2         | 8.8                                           | 0.5 - 56.9       |
| <b>Total</b> | <b>48.2</b>              | <b>38.9 - 57.4</b> | <b>27.9</b>              | <b>21 - 34.9</b> | <b>37.9</b>              | <b>31.8 - 43.9</b> | 11.7                                          | 7.1 - 19.0       |

<sup>1</sup>Rahman A, Chowdhury SM, Mashreky SR, Linnan M, Rahman AKMF. (2016) Report on Bangladesh Health and Injury Survey, DGHS, CIPRB, Dhaka.

Fatal drowning rates were higher in rural areas compared to urban areas of the sub-district (38.9/100,000 vs 29.3 per 100,000), and across all age groups except in infancy (<1 year) and early adulthood (18-24 years) where drowning fatality rates were higher in urban areas (Table 2).

Table 2. Distribution rates of fatal drowning by age and region of residence in the Barisal Division, Bangladesh

|              | Rural                     | Urban*                    |
|--------------|---------------------------|---------------------------|
| Age (years)  | Rate per 100,000 (95% CI) | Rate per 100,000 (95% CI) |
| <1 (infant)* | 79.8 (13.6 - 145.9)       | 160.9 (0.0 - 438.2)       |
| 1-4          | 277.2 (225.7 - 328.6)     | 135.4 (40.8 - 230.0)      |
| 5-9          | 68.9 (43.4 - 94.3)        | 31.5 (0.0 - 66.1)         |
| 10-14        | 18.9 (6.4 - 31.3)         | 18.5 (0.0 - 51.8)         |
| 15-17        | 11.5 (0.7 - 22.3)         | 8.6 (0.0 - 25.3)          |
| 18-24        | 11.0 (3.3 - 18.6)         | 65.7 (0.0 - 177.4)        |
| 25-39        | 3.5 (0.2 - 6.9)           | 0                         |
| 40-59        | 6.3 (0.1 - 12.4)          | 0                         |
| 60 +         | 13.9 (3.2 - 24.6)         | 0                         |
| <b>Total</b> | <b>38.9 (32.6 - 45.3)</b> | <b>29.3 (6.5 - 52.1)</b>  |

\*The event rate for infants and urban areas are very small, reporting very wide confidence interval

1  
2  
3 ***Drowning by distance of water body from households, type of water body, activity, seasonality and***  
4  
5 ***time of the day***  
6  
7

8 Across all age categories about three quarters of fatal drowning events occurred within 100 metres  
9 of the households. However, among adolescents aged 15-17 years and adults aged 40 years and  
10 above over 20.0% of drowning deaths occurred at a distance of over two kilometres (data not  
11 shown).  
12

13 The majority (98.0%) of drowning deaths took place in the community while less than 1.0% were  
14 related to disasters or while using water transportation. Over three-quarters of drowning deaths  
15 occurred in ponds and ditches (Figure 2a), and over half were in outdoor water bodies primarily used  
16 for bathing and washing (56.0%) (Figure 2b).  
17

18  
19  
20  
21  
22  
23  
24  
25  
26  
27 **INSERT FIGURE 2**  
28

29 Drowning occurred throughout the year, however fatalities peaked during the monsoon season  
30 particularly in the months of June and September which accounted for nearly one quarter (23.7%) of  
31 all drowning deaths (Figure 3).  
32

33  
34  
35  
36  
37 **INSERT FIGURE 3**  
38

39 Almost all fatal drownings occurred between the daylight hours of 6 *a.m.* and 6 *p.m.* with two-thirds  
40 (63.0%) taking place between the hours of 9 *a.m.* and 3 *p.m.* (Figure 4). Among children aged 1-4  
41 years most fatal drownings occurred between the hours of 12 *p.m.* and 4 *p.m.* (58.0%) which was  
42 followed by 8 *a.m.* to 12 *p.m.* (31.0%) (data not shown).  
43  
44  
45  
46  
47

48  
49  
50 **INSERT FIGURE 4**  
51

52 ***Person accompanying prior to drowning event***  
53

54 Almost two-thirds (62.3%) of drowned individuals were not accompanied by anyone during the  
55 drowning incident, while 15.0% were accompanied by a friend or colleague (data not shown).  
56  
57  
58  
59  
60

### **Individual involved in rescue**

During fatal drownings, neighbours or bystanders (43.0%) were the individuals most often involved in the rescue, followed by mothers (21.2%).

### **Factors associated with fatal drowning**

Univariate analyses for fatal drowning showed that children aged 1 to 4 years had three times higher odds of fatal drowning compared with those aged under one years. Similarly, households with more than four or more children had almost two times higher odds of experiencing a drowning fatality than households with one child. After adjustment, the factors that remained associated with fatal drowning were age, with children aged 1 to 4 years at three times higher odds than those aged less than one year, being male also significantly increased the odds of drowning fatalities by almost 70.0%. Number of children in the household was also significantly associated with fatal drowning and increased with increasing number of children (Table 3).

Table 3. Socio-demographic factors associated with drowning mortality

| Characteristic            | Univariate |      |      |         | Multivariable |       |       |         |
|---------------------------|------------|------|------|---------|---------------|-------|-------|---------|
|                           | OR         | LCL  | UCL  | p-value | OR            | LCL   | UCL   | p-value |
| <b>Sex</b>                |            |      |      |         |               |       |       |         |
| Male                      | 1.7        | 1.3  | 2.3  | 0.0004  | 1.7           | 1.2   | 2.3   | 0.0007  |
| Female                    | reference  |      |      |         | reference     |       |       |         |
| <b>Age group (years)</b>  |            |      |      |         |               |       |       |         |
| <1                        | reference  |      |      |         | reference     |       |       |         |
| 1-4                       | 3.0        | 1.4  | 6.3  | <.0001  | 3.0           | 1.4   | 6.4   | <.0001  |
| 5-9                       | 0.7        | 0.3  | 1.6  | .       | 0.7           | 0.3   | 1.5   | .       |
| 10-14                     | 0.2        | 0.1  | 0.6  | .       | 0.2           | 0.1   | 0.5   | .       |
| 15-17                     | 0.1        | 0.04 | 0.4  | .       | 0.1           | 0.03  | 0.3   | .       |
| 18-24                     | 0.2        | 0.08 | 0.5  | .       | 0.097         | 0.030 | 0.313 | .       |
| 25-39                     | 0.0        | 0.0  | 0.1  | .       | 0.0           | 0.0   | 0.09  | .       |
| 40-59                     | 0.1        | 0.0  | 0.2  | .       | 0.0           | 0.0   | 0.13  | .       |
| 60 +                      | 0.1        | 0.0  | 0.4  | .       | 0.1           | 0.0   | 0.2   | .       |
| <b>Maternal education</b> |            |      |      |         |               |       |       |         |
| None                      | 1.9        | 0.4  | 8.2  |         |               |       |       |         |
| 1 -5 years                | 2.8        | 0.7  | 11.4 | 0.3372  | .             | .     | .     | .       |
| 6-8 years                 | 2.5        | 0.6  | 10.6 | .       | .             | .     | .     | .       |
| 9-12 years                | 2.1        | 0.5  | 8.8  | .       | .             | .     | .     | .       |
| 13-17 years               | reference  |      |      |         | reference     |       |       |         |
| <b>Wealth quintile</b>    |            |      |      |         |               |       |       |         |
| Q1 (Lowest)               | 1.5        | 0.9  | 2.5  | 0.5147  | 1.3           | 0.8   | 2.2   | 0.8396  |

| Characteristic                       | Univariate |     |     |         | Multivariable |     |     |         |
|--------------------------------------|------------|-----|-----|---------|---------------|-----|-----|---------|
|                                      | OR         | LCL | UCL | p-value | OR            | LCL | UCL | p-value |
| Q2                                   | 1.2        | 0.6 | 2.2 | .       | 1.1           | 0.6 | 2.0 | .       |
| Q3                                   | 1.3        | 0.8 | 2.1 | .       | 1.2           | 0.7 | 1.9 | .       |
| Q4                                   | 1.2        | 0.6 | 2.1 | .       | 1.1           | 0.6 | 2.0 | .       |
| Q5 (Highest)                         | reference  |     |     |         | reference     |     |     |         |
| <b>No. of children in household*</b> |            |     |     |         |               |     |     |         |
| 1 child                              | reference  |     |     |         | reference     |     |     |         |
| 2 children                           | 0.9        | 0.6 | 1.4 | 0.6273  | 0.9           | 0.6 | 1.5 | 0.0026  |
| 3 children                           | 1.0        | 0.6 | 1.5 | .       | 1.2           | 0.8 | 1.8 | .       |
| 4 children                           | 1.3        | 0.8 | 2.1 | .       | 1.8           | 1.1 | 2.9 | .       |
| 5+ children                          | 1.4        | 0.8 | 2.4 | .       | 2.1           | 1.2 | 3.7 | .       |

\*Number of household with no children were very small to draw plausible inference

95% CI's

## DISCUSSION

The mortality and morbidity reporting systems in Bangladesh are poor [14]. To inform a large-scale drowning prevention strategy, we conducted a cross-sectional household survey to provide otherwise unavailable epidemiological data on drowning in the Barishal Division. Our study found a mortality rate from drowning of 37.9 per 100,000 per year across all ages in the Barishal division, which is over three times higher than the national rate reported in 2016 (11.7/100,000/year) [4]. The number of water bodies including rivers, lakes, ponds and ditches in this division is far higher than the other parts of the country. For both males and females fatal drowning rates were high in infancy, and peaked at 1-4 years of age, then fell rapidly through middle childhood and adolescence and remained relatively low throughout adulthood. This pattern of fatal drowning rates across the age groups in this study is consistent with another recent national survey[4].

Previous studies identified nearby ponds, ditches, and canals as the most common location of fatal drowning among children in Bangladesh[3, 14-17]. In the Barishal region, most households are surrounded by water bodies. Similar to previous studies, this study revealed that the majority of childhood drowning deaths occurred in ponds, ditches and canals situated within only 100 metres from their residences. Children are often with other siblings (children) or unaccompanied at the time

1  
2  
3 of drowning. Lack of supervision in younger children is a major risk factor. Attentiveness and  
4  
5 continuity are essential characteristics of the hierarchical model of supervision,[18] proximity to the  
6  
7 water exacerbates risk. However, among adults a considerable proportion of drowning fatalities  
8  
9 occurred at a distance of two kilometres from their houses. It is possible that these deaths occurred  
10  
11 in rivers where individuals were engaged in activities such as fishing or boating.  
12  
13

14  
15 Drowning deaths in Barishal occurred year-round but most frequently during the monsoon season  
16  
17 (June to October); this is similar to findings reported in prior studies[15, 19-21]. It is also notable that  
18  
19 in the dry season (November-December) the fatal drowning rates remained relatively high in  
20  
21 Barishal. This is likely because most natural water bodies including those close to households are  
22  
23 connected to the rivers and given much of the division is subject to two high tides where  
24  
25 waterbodies are filled twice a day by sea water including the dry season, this can increase the risk of  
26  
27 exposure especially among children playing in water bodies. Previous studies, have also reported  
28  
29 over 90% of fatal drowning events occurred in daylight hours [14, 22].  
30  
31

32  
33 Fatal drowning was strongly and significantly associated with sex with males having over 1.5 times  
34  
35 the odds of death from drowning. This may be a related to males greater engagement in risk taking  
36  
37 behaviours and exposure to high risk situations[23] or to existing traditional gender roles in  
38  
39 Bangladesh with young boys more likely to be out playing unsupervised whereas girls would be at  
40  
41 home helping with household activities. This points to the need to place specific emphasis on  
42  
43 targeting boys within drowning prevention programs. Age was also significantly related to fatal  
44  
45 drowning with those in the age group of 1-4 years having the greatest risk of drowning. This age  
46  
47 group has consistently been found to be at greater risk of drowning in Bangladesh and other South-  
48  
49 East Asian and Western Pacific countries[2, 15, 24] and may be related to challenges to achieve adult  
50  
51 supervision, the lack of swimming ability in this age group and other behavioural factors[15]. We did  
52  
53 not find any significant association between mother's education and fatal drowning risk. The socio-  
54  
55 economic status of our study population was fairly homogenous and no associations were reported  
56  
57  
58  
59  
60

1  
2  
3 across the socio-economic groups. Increased number of children in the household, increased the risk  
4  
5 of drowning events. Households with four or five children in the family were common place. In these  
6  
7 circumstances parents may find it difficult to adequately supervise all of them. These findings  
8  
9 support the need for programmes that can assist families with supervision.  
10  
11  
12  
13  
14  
15

## 16 **STRENGTHS AND LIMITATIONS OF THE STUDY**

17  
18 The strength of this study was that to ensure the quality of data, trained supervisors were recruited,  
19  
20 and they observed 10.0% of interviews conducted by the data collectors, checked 10.0% of the  
21  
22 collected data, and re-interviewed 2.0% of the households. In addition, field level research officers  
23  
24 and managers were appointed to re-check all data for inconsistencies. If inconsistency was detected,  
25  
26 the respective data collector was asked to revisit the household to collect correct information.  
27  
28  
29

30  
31 Another strength was that to include as fatal drowning the study used those external cause codes of  
32  
33 fatal drowning of ICD – 10 which provided more representative true burden of fatal drowning. In  
34  
35 addition to unintentional external cause of drowning codes, watercraft and flood related drowning,  
36  
37 and intentional self-harm by drowning codes were also included. Studies suggested to include these  
38  
39 later codes (watercraft, flood related and intentional self-harm) to obtain more representative  
40  
41 magnitude of fatal drowning [25, 26].  
42  
43  
44

45  
46 Given that the mortality burden is highest in children aged under five years, it should be noted that  
47  
48 under-reporting in overall mortality rates is an issue in this age group because of poor birth /vital  
49  
50 registration systems, so our results may have under-estimated the true burden. This is likely to affect  
51  
52 data on children aged under-one year to a larger extent. However, given that a two-year recall  
53  
54 period was used in this survey, the fatal drowning rates are likely to be conservative.  
55

56  
57 One of the major challenges in this study was to use the electronic data capturing system with an  
58  
59 intent to obtain real time data. Each data collector was given a tablet loaded with REDCap  
60

1  
2  
3 application, and a sim was inserted in the device to obtain wireless internet connection. However, in  
4  
5 the remote locations the internet connectivity was very poor and initially the data collectors could  
6  
7 not upload their collected data from the site of data collection. To resolve this issue, offline data  
8  
9 collection system was created in the software. Each day after data collection in the afternoon the  
10  
11 data collectors returned to the local office to get a high quality Wifi connection to upload their data.  
12  
13

14  
15 The survey was purposively conducted in Barishal division which is one of the eight divisions of  
16  
17 Bangladesh. In previous national injury surveys the highest drowning mortality rate among children  
18  
19 was observed in the Pirojpur district of Barishal division[3]. Considering this high rate the Barishal  
20  
21 division was selected for Project Bhasa.  
22

23  
24 The study findings highlight the very high magnitude of drowning deaths in the Barishal division.  
25  
26 Socio-demographic factors including being male, aged 1-4 years and having five or more children in  
27  
28 households was associated with increased risk of fatal drowning. The findings further demonstrate  
29  
30 that drowning is predominantly a problem that affects children in Bangladesh. The Barishal division  
31  
32 demands urgent interventions targeted at high risk groups identified here. Project Bhasa aims to  
33  
34 provide evidence-based interventions, including community day-care for under-five children to  
35  
36 ensure adult supervision during day time and providing swimming instruction and school water  
37  
38 safety education to children aged five years and over, to reduce drowning. It is expected that the  
39  
40 project will generate knowledge to assist with drowning reduction efforts both nationally and in  
41  
42 other similar settings.  
43  
44  
45  
46  
47  
48  
49

#### 50 **ACKNOWLEDGEMENTS**

51  
52 This research was a part of “Project BHASA” - a Comprehensive Drowning Reduction Strategy. We  
53  
54 thank Royal National Lifeboat Institution (RNLI) UK, The George Institute for Global Health (TGI),  
55  
56 Australia and the Directorate General of Health Services (DGHS), Ministry of Health and Family  
57  
58 Welfare (MoHFW), Government of the People’s Republic of Bangladesh for their support in the  
59  
60 study. We gratefully acknowledge Professor AHM Enayet Hussain, Additional Director General,

1  
2  
3 DGHS, MoHFW to Chair the National Steering Committee for the Project *Bhasa* and also for  
4 providing all necessary administrative support to accomplish the baseline survey. We also would like  
5 to thank Steve Wills and Ashim Kumar Saha for their contribution during data collection.  
6  
7  
8  
9

## 10 11 **CONTRIBUTORS**

12  
13  
14 AR participated in the design, implementation and supervision of field work and analysis and wrote  
15 the paper. JJ contributed on project design, data analysis and writing of the paper. KB and MJH  
16 contributed on project design, implementation, Data management and supervision of field work and  
17 writing of the paper. DR contributed on project design and writing of the paper. TA and KR were  
18 involved in data management and analysis and contributed to write the paper. RI and FR conceived  
19 the study and supervised throughout and contributed to the writing of the paper. RI and FR are the  
20 guarantors.  
21  
22  
23  
24  
25

## 26 27 **FUNDING**

28  
29 The research was funded by Royal National Life Boat Institution (RNLI), UK  
30  
31

## 32 33 **COMPETING INTERESTS**

34  
35 Authors declare no conflict of interest.  
36  
37

## 38 39 **ETHICAL APPROVAL**

40  
41 Obtained  
42  
43

## 44 45 **PROVENANCE AND PEER REVIEW**

46  
47 Not commissioned; externally peer reviewed.  
48  
49

## 50 51 **DATA SHARING STATEMENT**

52  
53 We have deidentified data which are available at Centre for Injury Prevention and Research,  
54 Bangladesh and The George Institute for Global Health. This was the baseline survey data generated  
55 from BHASA project which is a collaborative work of Royal National Lifeboat Institution, Centre for  
56 Injury Prevention and Research, Bangladesh and The George Institute for Global Health. Royal  
57  
58  
59  
60



1  
2  
3 National Lifeboat Institution funded to conduct the research work. The mentioned organisations  
4  
5 have rights to use the data. Data are available upon request to Dr Aminur Rahman  
6  
7 (aminur@ciprb.org) and Dr. Jagnoor Jagnoor (jjagnoor@georgeinstitute.org.au).  
8  
9

10 Figure 1: *Map of the Barishal division – the study area*

11  
12  
13 Figure 2: *Distribution of fatal drowning by type of water bodies (2a) and their use (2b)*

14  
15  
16 Figure 3: *Distribution of fatal drowning by time of the year in Barishal Division, Bangladesh*

17  
18  
19 Figure 4: *Distribution of fatal drowning by time of the day in Barishal Division, Bangladesh*  
20  
21  
22  
23  
24

## 25 REFERENCES

- 26  
27  
28  
29 1. World Health Organisation, *Global Health Estimates 2016: Deaths by Cause, Age, Sex, by Country and by Region, 2000-2016*. 2016, World Health Organization: Geneva, Switzerland.
- 30  
31  
32 2. World Health Organisation, *Global report on drowning: preventing a leading killer*. 2014, The World Health Organisation (WHO): Geneva, Switzerland.
- 33  
34  
35 3. Rahman, A., et al., *Bangladesh Health and Injury Survey Report on Children*. 2005, Directorate General of Health Services (DGHS), Ministry of Health & Family Welfare (MOHFW), Government of the People's Republic of Bangladesh, Institute of Child & Mother Health (ICMH), United Nations Children's Fund (UNICEF), The Alliance for Safe Children (TASC): Dhaka, Bangladesh.
- 36  
37  
38 4. Rahman, A., *Bangladesh Health and Injury Survey Report on Children 2016*. (unpublished), Centre for Injury Prevention and Research, Bangladesh: Dhaka, Bangladesh.
- 39  
40  
41 5. NIPORT, Mitra and Associates, and ICF International, *Bangladesh Demographic and Health Survey 2011* 2013, NIPORT, Mitra and Associates, and ICF International: Dhaka, Bangladesh and Calverton, Maryland, USA.
- 42  
43  
44 6. UNU-EHS and Bündnis Entwicklung Hilft, *World Risk Report 2015*. 2015, Bündnis Entwicklung Hilft (Alliance Development Works) and United Nations University – Institute for Environment and Human Security (UNU-EHS): Berlin.
- 45  
46  
47 7. Department of Disaster Management Bangladesh, *Disaster Report 2013*. 2015, Department of Disaster Management, Ministry of Disaster Management and Relief, Government of the People's Republic of Bangladesh: Dhaka, Bangladesh.
- 48  
49  
50 8. Azad, A., *Riverine Passenger Vessel Disaster in Bangladesh : Options for Mitigation and Safety*. 2009, BRAC University: Dhaka, Bangladesh.
- 51  
52  
53  
54  
55  
56  
57  
58  
59  
60

- 1  
2  
3 9. IWM, *Policy Brief: Local Level Hazard Maps for Flood, Storm, Surge and Salinity*. 2014, Institute  
4 of Water Modelling (IWM): Dhaka, Bangladesh.
- 5  
6 10. World Health Organisation, *International Statistical Classification of Diseases and Related*  
7 *Health Problems 10th Revision (ICD-10)*. 2016, The World Health Organization: Geneva,  
8 Switzerland.
- 9  
10 11. van Beeck, E.F., et al., *A new definition of drowning: towards documentation and prevention*  
12 *of a global public health problem*. Bull World Health Organ, 2005. **83**(11): p. 853-6.
- 13  
14 12. Passmore, J.W., J.O. Smith, and A. Clapperton, *True burden of drowning: compiling data to*  
15 *meet the new definition*. International Journal of Injury Control and Safety Promotion, 2007.  
16 **14**(1): p. 1-3.
- 17  
18 13. Harris, P., et al., *Research Electronic Data Capture (REDCap) - A metadata driven methodology*  
19 *and workflow process for providing translational research informatic support*. J Biomed  
20 Inform., 2009. **42**(2): p. 377–81.
- 21  
22 14. Rahman, A., et al., *Epidemiology of Drowning in Bangladesh: An Update*. Int J Environ Res  
23 Public Health, 2017. **14**(5): p. 1-11.
- 24  
25 15. Rahman, A., et al., *Analysis of the childhood fatal drowning situation in Bangladesh: exploring*  
26 *prevention measures for low-income countries*. Inj Prev, 2009. **15**(2): p. 75-9.
- 27  
28 16. Ahmed, M.K., M. Rahman, and J. van Ginneken, *Epidemiology of child deaths due to drowning*  
29 *in Matlab, Bangladesh*. Int J Epidemiol, 1999. **28**(2): p. 306-11.
- 30  
31 17. Hyder, A.A., et al., *Death from drowning: defining a new challenge for child survival in*  
32 *Bangladesh*. Inj Control Saf Promot, 2003. **10**(4): p. 205-10.
- 33  
34 18. Saluja, G., et al., *The role of supervision in child injury risk: definition, conceptual and*  
35 *measurement issues*. Inj. Control Saf. Promot., 2004. **11**: p. 17–22.
- 36  
37 19. Rahman, F., et al., *Cost-effectiveness of an injury and drowning prevention program in*  
38 *Bangladesh*. Pediatrics, 2012. **130**(6): p. e1621-e1628.
- 39  
40 20. Linnan, M., et al., *Child Mortality and Injury in Asia: Survey results and evidence*, in *Innocenti*  
41 *Working Paper 2007-06, Special Series on Child Injury No. 3*. 2007, UNICEF Innocenti Research  
42 Centre: Florence. p. 64-87.
- 43  
44 21. Rahman F, Andersson R, and S. L., *Health Impact of Injuries: A Population-Based*  
45 *Epidemiological Investigation in a Local Community of Bangladesh*. J Safety Res, 1998. **29**(4):  
46 p. 213-22.
- 47  
48 22. Hossain, M., et al., *Socio-demographic, environmental and caring risk factors for childhood*  
49 *drowning deaths in Bangladesh*. BMC Pediatr, 2015. **15**: p. 114.
- 50  
51 23. Croft, J.L. and C. Button, *Interacting Factors Associated with Adult Male Drowning in New*  
52 *Zealand*. PLoS One, 2015. **10**(6): p. e0130545.
- 53  
54 24. Yang, L., et al., *Risk factors for childhood drowning in rural regions of a developing country: a*  
55 *case-control study*. Injury prevention, 2007. **13**(3): p. 178-182.
- 56  
57  
58  
59  
60

- 1  
2  
3 25. Peden A.E., Franklin R.C., Mahony A.J., Scarr J., Barnsley P.D., *Using a retrospective cross-*  
4 *sectional study to analyse unintentional fatal drowning in Australia: ICD-10 coding based*  
5 *methodologies versus actual deaths*, BMJ Open, 2017;7:e019407. doi:10.1136/  
6 bmjopen-2017-019407  
7  
8  
9 26. Cenderadewi M., Franklin R.C., Peden A.E., Devine S., *Pattern of intentional drowning*  
10 *mortality: a total population retrospective cohort study in Australia, 2006–2014*, BMC Public  
11 Health, 2019; 19:207. doi.org/10.1186/s12889-019-6476-z  
12  
13  
14  
15  
16  
17  
18  
19  
20  
21  
22  
23  
24  
25  
26  
27  
28  
29  
30  
31  
32  
33  
34  
35  
36  
37  
38  
39  
40  
41  
42  
43  
44  
45  
46  
47  
48  
49  
50  
51  
52  
53  
54  
55  
56  
57  
58  
59  
60

For peer review only

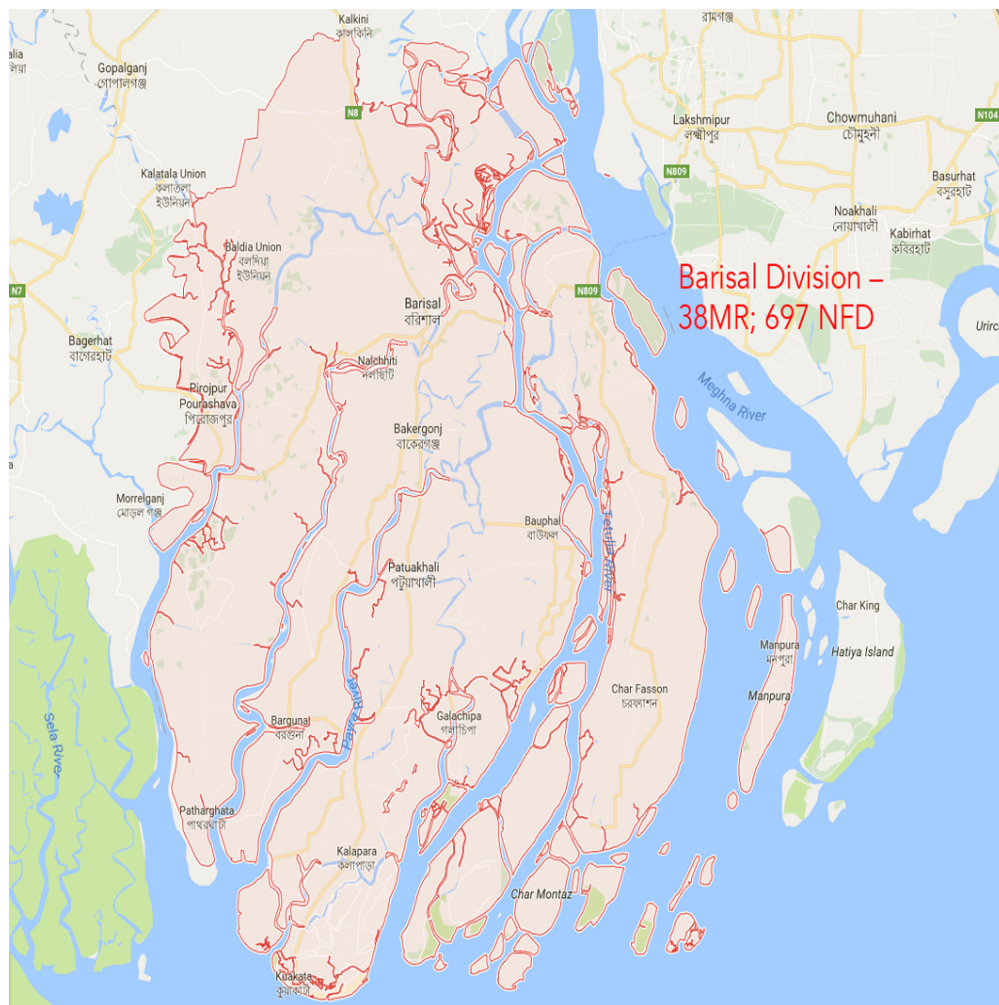

Figure 1: Map of the Barishal Division - the study area

1  
2  
3  
4  
5  
6  
7  
8  
9  
10  
11  
12  
13  
14  
15  
16  
17  
18  
19  
20  
21  
22  
23  
24  
25  
26  
27  
28  
29  
30  
31  
32  
33  
34  
35  
36  
37  
38  
39  
40  
41  
42  
43  
44  
45  
46  
47  
48  
49  
50  
51  
52  
53  
54  
55  
56  
57  
58  
59  
60

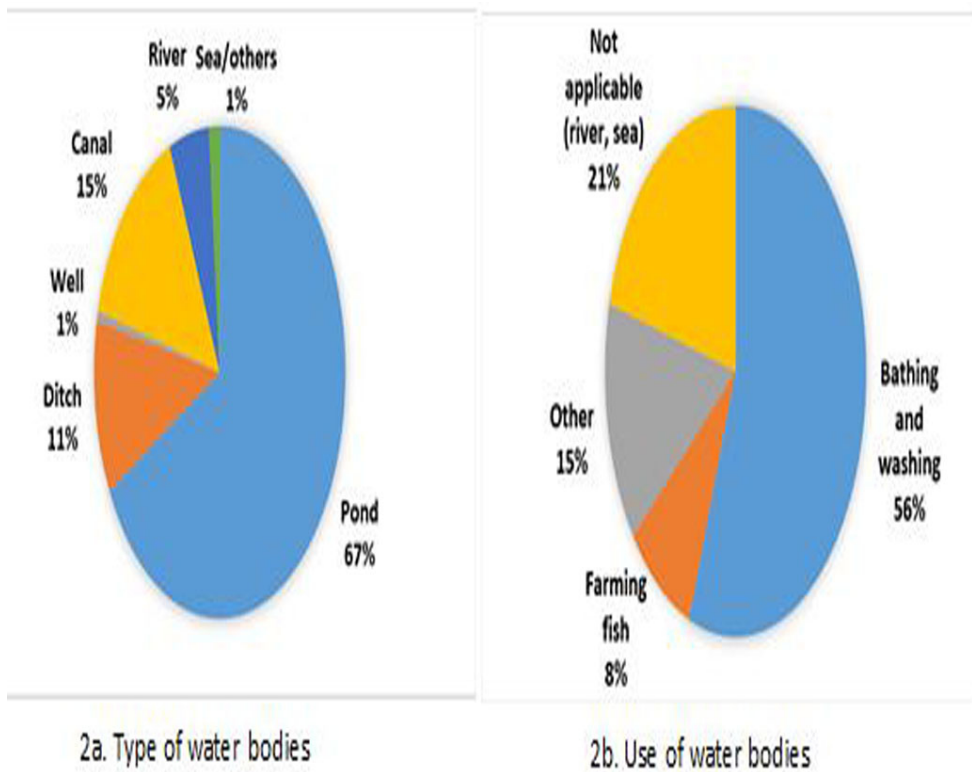

Figure 2: Distribution of fatal drowning by type of water bodies (2a) and their use (2b)

Figure 2: Drowning by types and use of water bodies

90x90mm (300 x 300 DPI)

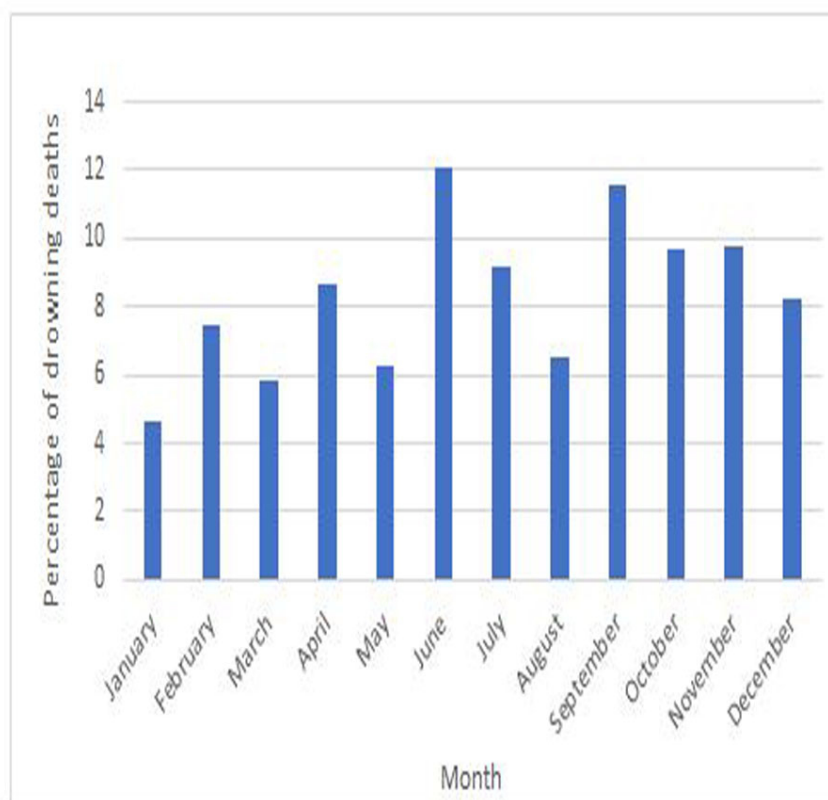

*Figure 3. Distribution of fatal drowning by time of the year in Barishal Division, Bangladesh*

Figure 3: Drowning by time of year

90x90mm (300 x 300 DPI)

1  
2  
3  
4  
5  
6  
7  
8  
9  
10  
11  
12  
13  
14  
15  
16  
17  
18  
19  
20  
21  
22  
23  
24  
25  
26  
27  
28  
29  
30  
31  
32  
33  
34  
35  
36  
37  
38  
39  
40  
41  
42  
43  
44  
45  
46  
47  
48  
49  
50  
51  
52  
53  
54  
55  
56  
57  
58  
59  
60

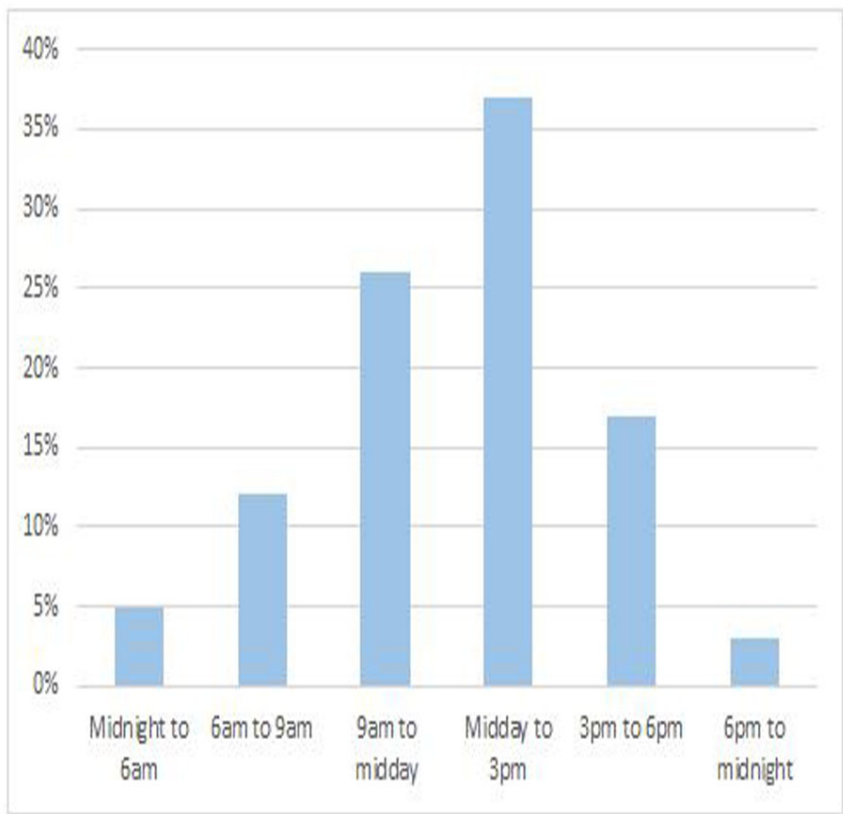

*Figure 4. Distribution of fatal drowning by time of the day in Barishal Division, Bangladesh*

Figure 4: Drowning by time of day  
90x90mm (300 x 300 DPI)

## STROBE Statement

**Vulnerability to fatal drowning among the population in Southern Bangladesh: findings from a cross-sectional household survey**

|                           | Item No | Recommendation                                                                                                                                                                                    | Page and Line Number(s)    |
|---------------------------|---------|---------------------------------------------------------------------------------------------------------------------------------------------------------------------------------------------------|----------------------------|
| <b>Title and abstract</b> | 1       | (a) Indicate the study's design with a commonly used term in the title or the abstract                                                                                                            | P2, L13                    |
|                           |         | (b) Provide in the abstract an informative and balanced summary of what was done and what was found                                                                                               | P2, L13-38                 |
| <b>Introduction</b>       |         |                                                                                                                                                                                                   |                            |
| Background/rationale      | 2       | Explain the scientific background and rationale for the investigation being reported                                                                                                              | P5, L3-23                  |
| Objectives                | 3       | State specific objectives, including any pre-specified hypotheses                                                                                                                                 | P5, L15-22                 |
| <b>Methods</b>            |         |                                                                                                                                                                                                   |                            |
| Study design              | 4       | Present key elements of study design early in the paper                                                                                                                                           | P5, L36-45                 |
| Setting                   | 5       | Describe the setting, locations, and relevant dates, including periods of recruitment, exposure, follow-up, and data collection                                                                   | P5, L36-41                 |
| Participants              | 6       | (a) Give the eligibility criteria, and the sources and methods of selection of participants                                                                                                       | P5, L40-43<br>P6, L39-43   |
| Variables                 | 7       | Clearly define all outcomes, exposures, predictors, potential confounders, and effect modifiers. Give diagnostic criteria, if applicable                                                          | P6, L3-31                  |
| Data sources/measurement  | 8*      | For each variable of interest, give sources of data and details of methods of assessment (measurement). Describe comparability of assessment methods if there is more than one group              | P5, L51-54<br>P6, L37-38   |
| Bias                      | 9       | Describe any efforts to address potential sources of bias                                                                                                                                         | P6, L57-60                 |
| Study size                | 10      | Explain how the study size was arrived at                                                                                                                                                         | P5, L40-45                 |
| Quantitative variables    | 11      | Explain how quantitative variables were handled in the analyses. If applicable, describe which groupings were chosen and why                                                                      | P7, L12-21                 |
| Statistical methods       | 12      | (a) Describe all statistical methods, including those used to control for confounding                                                                                                             | P7, L12-21                 |
|                           |         | (b) Describe any methods used to examine subgroups and interactions                                                                                                                               | P7, L3-8                   |
|                           |         | (c) Explain how missing data were addressed                                                                                                                                                       | P6, L44-47<br>P7, L22      |
|                           |         | (d) If applicable, describe analytical methods taking account of sampling strategy                                                                                                                | P7, L12-17                 |
|                           |         | (e) Describe any sensitivity analyses                                                                                                                                                             | N/A                        |
| <b>Results</b>            |         |                                                                                                                                                                                                   |                            |
| Participants              | 13*     | (a) Report numbers of individuals at each stage of study—eg numbers potentially eligible, examined for eligibility, confirmed eligible, included in the study, completing follow-up, and analysed | P7, L45-55                 |
|                           |         | (b) Give reasons for non-participation at each stage                                                                                                                                              | Not provided, less than 5% |
|                           |         | (c) Consider use of a flow diagram                                                                                                                                                                | N/A                        |



|                          |     |                                                                                                                                                                                                              |                                                                                                  |
|--------------------------|-----|--------------------------------------------------------------------------------------------------------------------------------------------------------------------------------------------------------------|--------------------------------------------------------------------------------------------------|
| Descriptive data         | 14* | (a) Give characteristics of study participants (eg demographic, clinical, social) and information on exposures and potential confounders                                                                     | P7, L47-53                                                                                       |
|                          |     | (b) Indicate number of participants with missing data for each variable of interest                                                                                                                          | P7, L21-22                                                                                       |
| Outcome data             | 15* | Report numbers of outcome events or summary measures                                                                                                                                                         | P7, L52-55                                                                                       |
| Main results             | 16  | (a) Give unadjusted estimates and, if applicable, confounder-adjusted estimates and their precision (eg, 95% confidence interval). Make clear which confounders were adjusted for and why they were included | P8, L31-56                                                                                       |
|                          |     | (b) Report category boundaries when continuous variables were categorized                                                                                                                                    | N/A                                                                                              |
|                          |     | (c) If relevant, consider translating estimates of relative risk into absolute risk for a meaningful time period                                                                                             | N/A                                                                                              |
| Other analyses           | 17  | Report other analyses done—eg analyses of subgroups and interactions, and sensitivity analyses                                                                                                               | P9, L11-3-<br>P9, L32-49<br>P9, L54-59<br>P10, L6-13<br>P10, L21-29<br>P10, L34-50<br>P11, L7-50 |
| <b>Discussion</b>        |     |                                                                                                                                                                                                              |                                                                                                  |
| Key results              | 18  | Summarise key results with reference to study objectives                                                                                                                                                     | P12, 9-30                                                                                        |
| Limitations              | 19  | Discuss limitations of the study, taking into account sources of potential bias or imprecision. Discuss both direction and magnitude of any potential bias                                                   | P14, L10-20                                                                                      |
| Interpretation           | 20  | Give a cautious overall interpretation of results considering objectives, limitations, multiplicity of analyses, results from similar studies, and other relevant evidence                                   | P13, L17-51                                                                                      |
| Generalisability         | 21  | Discuss the generalisability (external validity) of the study results                                                                                                                                        | P14, L47-52                                                                                      |
| <b>Other information</b> |     |                                                                                                                                                                                                              |                                                                                                  |
| Funding                  | 22  | Give the source of funding and the role of the funders for the present study and, if applicable, for the original study on which the present article is based                                                | P15, L43                                                                                         |

\*Give information separately for exposed and unexposed groups.

**Note:** An Explanation and Elaboration article discusses each checklist item and gives methodological background and published examples of transparent reporting. The STROBE checklist is best used in conjunction with this article (freely available on the Web sites of PLoS Medicine at <http://www.plosmedicine.org/>, Annals of Internal Medicine at <http://www.annals.org/>, and Epidemiology at <http://www.epidem.com/>). Information on the STROBE Initiative is available at [www.strobe-statement.org](http://www.strobe-statement.org).

# BMJ Open

## Vulnerability to fatal drowning among the population in Southern Bangladesh: findings from a cross-sectional household survey

|                                 |                                                                                                                                                                                                                                                                                                                                                                                                                                                                                                                                                                                                                                                                                                                                                                  |
|---------------------------------|------------------------------------------------------------------------------------------------------------------------------------------------------------------------------------------------------------------------------------------------------------------------------------------------------------------------------------------------------------------------------------------------------------------------------------------------------------------------------------------------------------------------------------------------------------------------------------------------------------------------------------------------------------------------------------------------------------------------------------------------------------------|
| Journal:                        | <i>BMJ Open</i>                                                                                                                                                                                                                                                                                                                                                                                                                                                                                                                                                                                                                                                                                                                                                  |
| Manuscript ID                   | bmjopen-2018-027896.R2                                                                                                                                                                                                                                                                                                                                                                                                                                                                                                                                                                                                                                                                                                                                           |
| Article Type:                   | Original research                                                                                                                                                                                                                                                                                                                                                                                                                                                                                                                                                                                                                                                                                                                                                |
| Date Submitted by the Author:   | 18-Jul-2019                                                                                                                                                                                                                                                                                                                                                                                                                                                                                                                                                                                                                                                                                                                                                      |
| Complete List of Authors:       | Rahman, Aminur; Centre for Injury Prevention and Research Bangladesh (CIPRB), International Drowning Research Centre - Bangladesh (IDRC-B)<br>Jagnoor, Jagnoor; The George Institute for Global Health, University of Sydney<br>Baset, Kamran; International Drowning Research Centre-Bangladesh (IDRC-B)<br>Ryan, Dan; Royal National Lifeboat Institution, Ahmed, Tahera; International Drowning Research Centre-Bangladesh (IDRC-B)<br>Rogers, Kris; The George Institute for Global Health, University of Sydney<br>Hossain, Mohammad; International Drowning Research Centre-Bangladesh (IDRC-B)<br>Ivers, Rebecca; The George Institute for Global Health, University of Sydney<br>Rahman, AKM; International Drowning Research Centre-Bangladesh (IDRC-B) |
| <b>Primary Subject Heading</b>: | Public health                                                                                                                                                                                                                                                                                                                                                                                                                                                                                                                                                                                                                                                                                                                                                    |
| Secondary Subject Heading:      | Epidemiology                                                                                                                                                                                                                                                                                                                                                                                                                                                                                                                                                                                                                                                                                                                                                     |
| Keywords:                       | drowning, Fatal drowning, mortality, injury, risk factor, Bangladesh                                                                                                                                                                                                                                                                                                                                                                                                                                                                                                                                                                                                                                                                                             |
|                                 |                                                                                                                                                                                                                                                                                                                                                                                                                                                                                                                                                                                                                                                                                                                                                                  |

SCHOLARONE™  
Manuscripts

1  
2  
3 **Vulnerability to fatal drowning among the population in Southern Bangladesh: findings**  
4 **from a cross-sectional household survey**  
5  
6  
7

8 Aminur Rahman<sup>1\*</sup>, Jagnoor Jagnoor<sup>2</sup>, Kamran-ul-Baset<sup>1</sup>, Daniel Ryan<sup>3</sup>, Tahera Ahmed<sup>1</sup>, Kris Rogers<sup>2</sup>,  
9 Mohammad Jahangir Hossain<sup>1</sup>, Rebecca Ivers<sup>2</sup>, AKM Fazlur Rahman<sup>1</sup>  
10  
11  
12  
13  
14  
15  
16  
17

18 \*Corresponding Author  
19

20  
21 <sup>1</sup> International Drowning Research Centre – Bangladesh, Centre for Injury Prevention and Research,  
22 Bangladesh  
23

24 Dhaka, Bangladesh  
25

26 House B162, Road No. 23,  
27

28 New DOHS, Mohakhali  
29

30 Dhaka Bangladesh 1206  
31

32 Email: aminur@ciprb.org  
33

34 Phone: +88-02-58814988  
35  
36  
37  
38  
39  
40  
41  
42  
43  
44  
45  
46  
47  
48  
49

50 <sup>2</sup> The George Institute for Global Health, Injury Division, University of New South Wales, Australia  
51

52 <sup>3</sup> Royal National Lifeboat Institution (RNLI), Poole, UK  
53  
54  
55  
56  
57  
58  
59  
60

**ABSTRACT**

**Objectives:** To determine the fatal drowning burden and associated risk factors in Southern Bangladesh.

**Settings:** The survey was conducted in 39 sub-districts of all six districts of the Barishal division, Southern Bangladesh.

**Participants:** All residents (for a minimum 6 months prior to survey) of the Barishal division, Southern Bangladesh.

**Intervention/methods:** A cross-sectional, divisionally representative household survey was conducted in all six districts of the Barishal division between September 2016 and February 2017, covering a population of 386,016. Data were collected by face-to-face interview with adult respondents using handheld electronic tablets. International Classification of Diseases, 10, Chapter XX codes for drowning W65 – W74, X36 – X39, V90, V92, X71 or X92, were used as operational definition of a drowning event .

**Results:** The overall fatal drowning rate in Barishal was 37.9/100,000 population per year (95% CI 31.8–43.9). The highest fatal drowning rate was observed among children 1-4 years (262.2/100,000/year). Mortality rates among males (48.2/100,000/year) exceeded females. A higher rate of fatal drowning was found in rural (38.9/100,000/year) compared to urban areas (29.3/100,000/year). Results of the multivariable logistic regression identified that the factors significantly associated with fatal drowning were being male (OR 1.7, 95% CI: 1.2 - 2.3), aged 1-4 years (OR 3.0, 95% CI 1.4 - 6.4) and residing in a household with 4 or more children (4 or more children OR 1.8, 1.1 – 2.9; and 5 or more children OR 2.1, 1.2 – 3.7).

**Conclusion:** Drowning is a public health problem, especially for children, in the Barishal division of Southern Bangladesh. Male gender, children 1-4 years of age and residing in a household with 4 or more children were associated with increased risk of fatal drowning events. The Barishal division demands urgent interventions targeted at high risk groups identified in the survey.

**Trial Registry:** Not applicable

**Key words:** Drowning, fatal drowning, mortality, injury, risk factor, Bangladesh

**ARTICLE SUMMARY****Strengths and limitations of this study**

- A key strength of this study was the large divisionally representative sample of Barishal division in Bangladesh, to guide contextual implementation of effective interventions.
- The study used multiple methods for quality control, of significance are the learnings from use of electronic data capture system with low access to internet.
- Limitations included the cross-sectional nature of the study which may have introduced recall bias. Although the proportion of refusals was small (2%), collecting data on reasons for non-participation could have added to the strength of the study.
- Under reporting in overall mortality rates is a concern for children under five years and may have contributed to an under-estimate of the true mortality in this age group.

## INTRODUCTION

An estimated 322,149 drowning deaths occur globally every year making fatal drowning a major global health problem<sup>[1]</sup>. Half of all drowning fatalities occur in people under the age of 25 with children aged between 1 – 4 years most vulnerable. More than 90% of drowning incidents take place in low- and middle-income countries (LMICs) where men, women and children have a higher exposure to the risks associated with open water<sup>[2]</sup>. According to the 2012 WHO Global Health Estimates, the overall mortality rate from drowning globally was 5.2 per 100,000 population with the highest rates observed in the African Region (7.9 per 100,000 population) followed by South-East Asia Region (7.4 per 100,000 population)<sup>[2]</sup>.

In 2005, the first Bangladesh Health and Injury Survey (BHIS), identified drowning as the leading cause of death among children 1-17 years with approximately 17,000 children dying each year<sup>[3]</sup>. In 2016, the BHIS was carried out for the second time and again drowning was found to be the main cause of injury deaths among children aged 1-4 and 5-9 years. According to the 2016 BHIS, every day 40 children (aged between 0-17 years) lost their life due to drowning and this was the highest among

1  
2  
3 all injury fatalities. Among adults (aged 18 years or more) there were 13 deaths from drowning per  
4 day and this was the sixth leading cause of injury death in that age category<sup>[4]</sup>. The 2011 Bangladesh  
5 Demographic Health Survey (BDHS) found that while the risk of dying from other conditions, such as  
6 vaccine preventable communicable diseases, had significantly decreased, fatalities from drowning  
7 among children aged 1-4 years rose alarmingly from 19.0% in 2004 to 43.0% in 2011<sup>[5]</sup>.

8  
9  
10 Bangladesh is a highly disaster prone country, ranked sixth in the 2015 World Risk Report<sup>[6]</sup>. It is  
11 especially vulnerable to cyclones and frequent flooding which claim many lives each year<sup>[7]</sup>. The  
12 country is intersected by many rivers, drowning during inland water transport accidents is also  
13 common<sup>[8]</sup>.

14  
15  
16 The 2005 BHIS identified that the highest mortality rate due to drowning occurred in the Pirojpur  
17 district of Barishal division in Bangladesh<sup>[3]</sup>. Geographically, the Barishal division is located in the  
18 central southern region of Bangladesh where several large rivers converge; with a land mass of  
19 13,644.85 km<sup>2</sup> and a population of 8,147,000. As a low lying, coastal division, Barishal is vulnerable  
20 to natural hazards and the effects of climate change. All six districts under this division are affected  
21 by water-related hazards<sup>[9]</sup>.

22  
23  
24 Considering these factors, Project *Bhasa*, a Comprehensive Drowning Reduction Strategy was  
25 designed to reduce fatal drowning and morbidity utilizing evidence-based interventions. As part of  
26 this initiative, a baseline survey was conducted to determine the burden and context of fatal  
27 drowning in the Barishal division of Southern Bangladesh.

## 28 29 30 31 32 33 34 35 36 37 38 39 40 41 42 43 44 45 46 47 48 49 50 51 **METHODS**

52  
53 The *Bhasa* baseline survey was a population-based cross-sectional survey representative to the  
54 Barishal Division, one of the country's eight divisions. Geographically, the division is located in the  
55 central southern region of Bangladesh where several large rivers converge. The survey was  
56 conducted between September 2016 and February 2017 in 39 sub-districts of all six districts  
57  
58  
59  
60

1  
2  
3 (Barguna, Barishal, Bhola, Jhalokathi, Patuakhali and Pirojpur) of the division (Fig. 1). The survey  
4 covered 95,063 households comprising 386, 016 population in the selected sub-districts and used a  
5 multi-stage stratified cluster sampling method. The sampling frame for upazilas (county)/villages was  
6 designed to give a probability of selection proportional to population, and household sampling was  
7 conducted using the WHO EPI approach <sup>[10]</sup>.  
8  
9  
10  
11  
12  
13  
14  
15  
16

### 17 **INSERT Figure 1: Map of the Barishal division – the study area**

#### 21 **Measures**

22  
23 The operational definition of injury mortality used in this study was in accordance with International  
24 Classification of Disease (ICD), Version 10, Chapter XX recording intent and mechanism of injury <sup>[11]</sup>.  
25

26 It was defined as, ‘any death occurred due to external harm resulting from a fall, burn, cut,  
27 transportation, suffocation, drowning, machine/tool injury, electrocution, animal injury, blunt object  
28 injury, poisoning, suicide and violence’. Drowning was described as ‘the process of experiencing  
29 respiratory impairment from submersion or immersion in liquid’<sup>[12]</sup>. Drowning deaths were included  
30 if the cause was any of the following external cause codes from Chapter XX ICD-10<sup>[11, 13]</sup>: codes W65  
31 – W74 (unintentional drowning), X36 – X39 (exposure to forces of nature –water related, V90  
32 (drowning or submersion due to accident to watercraft), V92 (drowning and submersion due to  
33 accident on board watercraft, without accident to watercraft), X71 (intentional self-harm by  
34 drowning and submersion) or X92 (assault by drowning and submersion while in bath tub).  
35  
36  
37  
38  
39  
40  
41  
42  
43  
44  
45  
46  
47  
48

49 Information on all fatal injuries was collected over a two-year recall period, from the day of survey.  
50 Whilst there is a potential issue of recall bias, previous literature from Verbal Autopsy (VA) reporting  
51 cause of death has shown high validity and sensitivity for up to three years for causes of death  
52 involving injury <sup>[14]</sup>. For all cases of fatal drowning additional information was collected on potential  
53 risk factors. These included socio-demographic characteristics, access to water, and risk factors pre-  
54 event (e.g. location and type of water body, activity of the person prior to drowning, person  
55  
56  
57  
58  
59  
60



1  
2  
3 accompanying prior to drowning, accompanying person's age) , event (e.g. time and season of  
4 drowning) and post-drowning event (e.g. time of rescue, person rescued, action taken after rescue).  
5  
6 Information was gathered on knowledge, attitudes and practices related to drowning, drowning  
7 prevention and disaster preparedness. Finally, data were also collected on all mortality and all  
8 causes of injury mortality.  
9  
10  
11  
12  
13  
14  
15  
16

### 17 **Data collection and procedures**

18 Data were collected using a pre-tested structured questionnaire by 50 trained data collectors.  
19 Information was gathered from household heads, mothers or any residing adults aged 18 years or  
20 older through face-to-face interviews after obtaining written informed consent. Each selected  
21 respondent provided information of all household members including children. Each day data  
22 collectors visited 25-30 households to collect information. Non-participation due to refusal was  
23 2.0%. To ensure data quality, responsible supervisors randomly re-surveyed 2.0% of the households.  
24 An electronic data capturing tool using the REDCap application, was used on tablets for data  
25 collection<sup>[15]</sup>.  
26  
27  
28  
29  
30  
31  
32  
33  
34  
35  
36  
37  
38

### 39 **Statistical analysis**

40 In this study, to estimate the rates, weights were created for the survey data to appropriately adjust  
41 for differences in probability of selection and response rates according to age and sex. The  
42 probability of selection based on sampling information (number of upazilas that are the sub- districts  
43 of a division, and number of villages) was calculated and then adjusted to the age and sex  
44 distribution from the 2011 Bangladesh Population and Housing Census. All data were analysed using  
45 SAS 9.4 with SAS/STAT 14.2.  
46  
47  
48  
49  
50  
51  
52  
53  
54  
55  
56

57 While analysing the rates (per 100,000/population) for fatal drowning and percentage for other  
58 variables Taylor Series method was used. This incorporated the survey weights and the other  
59  
60

1  
2  
3 features of survey design (stratification by district, and cluster sampling of villages). Multivariable  
4  
5 logistic regression was used to examine associations between various socio-demographic factors  
6  
7 with fatal drowning. Due to electronic data capture and in-built internal validity checks, missing data  
8  
9 was minimised with only 1.01%; 977 records were not used due to missing data. Denominator  
10  
11 population data was based on Bangladesh Bureau of Statistics, accommodating for a growth rate of  
12  
13 1.37 from the 2011 census <sup>[16]</sup>.  
14  
15  
16  
17  
18  
19

### 20 **Ethical considerations**

21 This study received ethical approvals from the ethical review committee of the Centre for Injury  
22  
23 Prevention and Research, Bangladesh (CIPRB), Bangladesh and the Human Ethics Committee of the  
24  
25 University of Sydney, Australia. The ethics approval numbers were CIPRB/ERC/2016/12 and USyd  
26  
27 HREC - 2016/606 respectively.  
28  
29  
30  
31  
32

### 33 **Patient and public involvement statement**

34  
35  
36 *"This is a community-based household survey. Community leaders were consulted for filed*  
37  
38 *implementation of the survey, and input sought on the tool for capturing context relevant data."*  
39  
40  
41  
42  
43  
44  
45  
46  
47  
48  
49  
50  
51  
52  
53  
54  
55  
56  
57  
58  
59  
60

## RESULTS

A total of 95,063 households were visited of which 92,616 household representatives (97.4%) completed the survey. Males and females were equally represented among the sampled population (49.1% vs 50.9%) and over one-third (37.2%) of the population were children under-18 years. A total of 4,128 deaths were reported in the two-year recall period, giving an overall mortality rate of 5.3/100,000 population per year (data not shown).

### ***Drowning burden and mortality rates***

Drowning accounted for 6.6% of deaths across all age group, however among children aged 1-4 years drowning was the cause of more than one-third of all deaths (35.1%). One in ten deaths among infants (<1 year) and children aged 5 to 9 years were a result from drowning (data not shown). In the two-year recall period, there were 285 fatal drownings across all ages giving an all-age drowning mortality rate of 37.9/100,000 population per year (95%CI: 31.8 - 43.9). All fatal drownings were reported to be unintentional. Fatal drowning rates were consistently higher among males compared to females across all ages except among those aged 10-14 years where a higher rate was observed among females. However, this higher rate among 10-14 year girls was not statistically significant.

The highest fatal drowning rates were in children aged 1-4 years at 262.2/100,000 per year (95% CI: 216.4 - 308.0) followed by infants (88.6/100,000) then children aged 5-9 years (65.1/100,000). In early adolescence (10-14 years) fatal drowning rates decreased but increased again in early adulthood (18-24 years) and among those aged 60 years and over where higher rates of fatal drownings were observed (Table 1).

Table 1. Drowning deaths and mortality rates by age and sex in the Barishal division, Bangladesh

| Sex          | Male                    |                         |                   | Female                  |                         |                 | All persons             |                         |                   | National Rate both sex BHIS 2016 <sup>1</sup> |                   |
|--------------|-------------------------|-------------------------|-------------------|-------------------------|-------------------------|-----------------|-------------------------|-------------------------|-------------------|-----------------------------------------------|-------------------|
| AGE (years ) | Numerator (Denominator) | Rate (per 100,000/year) | 95% CI (LL, UL)   | Numerator (Denominator) | Rate (per 100,000/year) | 95% CI (LL, UL) | Numerator (Denominator) | Rate (per 100,000/year) | 95% CI (LL, UL)   | Rate (per 100,000/year)                       | 95% CI (LL - UL)  |
| <1           | 7 (3389)                | 142.9                   | 22.9, 263.0       | 3 (3380)                | 34.8                    | 0, 81.9         | 10 (6769)               | 88.6                    | 25.4, 151.9       | 53.3                                          | 2.8 - 345.8       |
| 1 to 4       | 96 (14147)              | 325.3                   | 252.6, 398.0      | 74 (14192)              | 199.8                   | 143.1, 256.5    | 170 (28339)             | 262.2                   | 216.4, 308.0      | 71.7                                          | 31.4 - 154.8      |
| 5 to 9       | 31 (21454)              | 78.7                    | 48.9, 108.4       | 21 (20640)              | 51.8                    | 25.1, 78.4      | 52 (42094)              | 65.1                    | 42.4, 87.9        | 28.1                                          | 9.0 - 77.3        |
| 10 to 14     | 5 (23085)               | 9.3                     | 0, 18.8           | 9 (22765)               | 28.2                    | 6.7, 49.8       | 14 (45850)              | 18.9                    | 7.2, 30.5         | 3.2                                           | 0.0 - 36.2        |
| 15 to 17     | 6 (11094)               | 21.1                    | 2.8, 39.3         | 0 (9240)                | -                       | -               | 6 (20334)               | 11.2                    | 1.5, 20.9         | 5.6                                           | 0.0 - 63.5        |
| 18 to 24     | 8 (17688)               | 24.1                    | 0, 52.9           | 6 (24638)               | 10.8                    | 1.3, 20.4       | 14 (42326)              | 17.2                    | 2.9, 31.5         | -                                             |                   |
| 25 to 39     | 6 (41449)               | 5.2                     | 0, 10.9           | 1 (49676)               | 1.2                     | 0, 3.5          | 7 (91125)               | 3.1                     | 0.1, 6.1          | 2.5                                           | 0.1 - 16.2        |
| 40 to 59     | 4 (36444)               | 8.1                     | 0, 18.2           | 2 (35568)               | 3.1                     | 0, 7.4          | 6 (72012)               | 5.6                     | 0.1, 11.1         | 8.6                                           | 1.9 - 30.3        |
| 60+          | 5 (20226)               | 22.3                    | 3.6, 40.9         | 1 (16052)               | 3.1                     | 0, 9.1          | 6 (36278)               | 12.6                    | 2.9, 22.2         | 8.8                                           | 0.5 - 56.9        |
| <b>Total</b> | <b>168 (188976)</b>     | <b>48.2</b>             | <b>38.9, 57.4</b> | <b>117 (196151)</b>     | <b>27.9</b>             | <b>21, 34.9</b> | <b>285 (385127)</b>     | <b>37.9</b>             | <b>31.8, 43.9</b> | <b>11.7</b>                                   | <b>7.1 - 19.0</b> |

<sup>1</sup>Rahman A, Chowdhury SM, Mashreky SR, Linnan M, Rahman AKMF. (2016) Report on Bangladesh Health and Injury Survey, DGHS, CIPRB, Dhaka.

Fatal drowning rates were higher in rural areas compared to urban areas of the sub-district (38.9/100,000 vs 29.3 per 100,000), and across all age groups except in infancy (<1 year) and early adulthood (18-24 years) where drowning fatality rates were higher in urban areas (Table 2).

Table 2. Distribution rates of fatal drowning by age and region of residence in the Barisal Division, Bangladesh

|              | Rural                     | Urban*                    |
|--------------|---------------------------|---------------------------|
| Age (years)  | Rate per 100,000 (95% CI) | Rate per 100,000 (95% CI) |
| <1 (infant)* | 79.8 (13.6 - 145.9)       | 160.9 (0.0 - 438.2)       |
| 1-4          | 277.2 (225.7 - 328.6)     | 135.4 (40.8 - 230.0)      |
| 5-9          | 68.9 (43.4 - 94.3)        | 31.5 (0.0 - 66.1)         |
| 10-14        | 18.9 (6.4 - 31.3)         | 18.5 (0.0 - 51.8)         |
| 15-17        | 11.5 (0.7 - 22.3)         | 8.6 (0.0 - 25.3)          |
| 18-24        | 11.0 (3.3 - 18.6)         | 65.7 (0.0 - 177.4)        |
| 25-39        | 3.5 (0.2 - 6.9)           | 0                         |
| 40-59        | 6.3 (0.1 - 12.4)          | 0                         |
| 60 +         | 13.9 (3.2 - 24.6)         | 0                         |
| <b>Total</b> | <b>38.9 (32.6 - 45.3)</b> | <b>29.3 (6.5 - 52.1)</b>  |

\*The event rate for infants and urban areas are very small, reporting very wide confidence interval

1  
2  
3 ***Drowning by distance of water body from households, type of water body, activity, seasonality and***  
4  
5 ***time of the day***  
6  
7

8 Across all age categories about three quarters of fatal drowning events occurred within 100 metres  
9 of the households. However, among adolescents aged 15-17 years and adults aged 40 years and  
10 above over 20.0% of drowning deaths occurred at a distance of over two kilometres (data not  
11 shown).  
12  
13  
14  
15

16  
17 The majority (98.0%) of drowning deaths took place in the community while less than 1.0% were  
18 related to disasters or while using water transportation. Over three-quarters of drowning deaths  
19 occurred in ponds and ditches (Figure 2a), and over half were in outdoor water bodies primarily used  
20 for bathing and washing (56.0%) (Figure 2b).  
21  
22  
23  
24  
25

26  
27 **INSERT FIGURE 2**  
28  
29

30 Drowning occurred throughout the year, however fatalities peaked during the monsoon season  
31 particularly in the months of June and September which accounted for nearly one quarter (23.7%) of  
32 all drowning deaths (Figure 3).  
33  
34  
35

36  
37 **INSERT FIGURE 3**  
38  
39

40 Almost all fatal drownings occurred between the daylight hours of 6 *a.m.* and 6 *p.m.* with two-thirds  
41 (63.0%) taking place between the hours of 9 *a.m.* and 3 *p.m.* (Figure 4). Among children aged 1-4  
42 years most fatal drownings occurred between the hours of 12 *p.m.* and 4 *p.m.* (58.0%) which was  
43 followed by 8 *a.m.* to 12 *p.m.* (31.0%) (data not shown).  
44  
45  
46  
47  
48

49  
50 **INSERT FIGURE 4**  
51  
52

53 ***Person accompanying prior to drowning event***  
54

55 Almost two-thirds (62.3%) of drowned individuals were not accompanied by anyone during the  
56 drowning incident, while 15.0% were accompanied by a friend or colleague (data not shown).  
57  
58  
59  
60

### ***Individual involved in rescue***

During fatal drownings, neighbours or bystanders (43.0%) were the individuals most often involved in the rescue, followed by mothers (21.2%).

### ***Factors associated with fatal drowning***

Univariate analyses for fatal drowning showed that children aged 1 to 4 years had three times higher odds of fatal drowning compared with those aged under one years. Similarly, households with four or more children had almost two times higher odds of experiencing a drowning fatality than households with one child. After adjustment, the factors that remained associated with fatal drowning were age, with children aged 1 to 4 years at three times higher odds than those aged less than one year, being male also significantly increased the odds of drowning fatalities by almost 70.0%. Number of children in the household was also significantly associated with fatal drowning and increased with increasing number of children (Table 3).

Table 3. Socio-demographic factors associated with drowning mortality

| Characteristic           | Univariate |      |     |         | Multivariable |       |       |         |
|--------------------------|------------|------|-----|---------|---------------|-------|-------|---------|
|                          | OR         | LCL  | UCL | p-value | OR            | LCL   | UCL   | p-value |
| <b>Sex</b>               |            |      |     |         |               |       |       |         |
| Male                     | 1.7        | 1.3  | 2.3 | 0.0004  | 1.7           | 1.2   | 2.3   | 0.0007  |
| Female                   | reference  |      |     |         | reference     |       |       |         |
| <b>Age group (years)</b> |            |      |     |         |               |       |       |         |
| <1                       | reference  |      |     |         | reference     |       |       |         |
| 1-4                      | 3.0        | 1.4  | 6.3 | <.0001  | 3.0           | 1.4   | 6.4   | <.0001  |
| 5-9                      | 0.7        | 0.3  | 1.6 | .       | 0.7           | 0.3   | 1.5   | .       |
| 10-14                    | 0.2        | 0.1  | 0.6 | .       | 0.2           | 0.1   | 0.5   | .       |
| 15-17                    | 0.1        | 0.04 | 0.4 | .       | 0.1           | 0.03  | 0.3   | .       |
| 18-24                    | 0.2        | 0.08 | 0.5 | .       | 0.097         | 0.030 | 0.313 | .       |

| Characteristic                       | Univariate |     |      |         | Multivariable |     |      |         |
|--------------------------------------|------------|-----|------|---------|---------------|-----|------|---------|
|                                      | OR         | LCL | UCL  | p-value | OR            | LCL | UCL  | p-value |
| 25-39                                | 0.0        | 0.0 | 0.1  | .       | 0.0           | 0.0 | 0.09 | .       |
| 40-59                                | 0.1        | 0.0 | 0.2  | .       | 0.0           | 0.0 | 0.13 | .       |
| 60 +                                 | 0.1        | 0.0 | 0.4  | .       | 0.1           | 0.0 | 0.2  | .       |
| <b>Maternal education</b>            |            |     |      |         |               |     |      |         |
| None                                 | 1.9        | 0.4 | 8.2  |         |               |     |      |         |
| 1 -5 years                           | 2.8        | 0.7 | 11.4 | 0.3372  | .             | .   | .    | .       |
| 6-8 years                            | 2.5        | 0.6 | 10.6 | .       | .             | .   | .    | .       |
| 9-12 years                           | 2.1        | 0.5 | 8.8  | .       | .             | .   | .    | .       |
| 13-17 years                          | reference  |     |      |         | reference     |     |      |         |
| <b>Wealth quintile</b>               |            |     |      |         |               |     |      |         |
| Q1 (Lowest)                          | 1.5        | 0.9 | 2.5  | 0.5147  | 1.3           | 0.8 | 2.2  | 0.8396  |
| Q2                                   | 1.2        | 0.6 | 2.2  | .       | 1.1           | 0.6 | 2.0  | .       |
| Q3                                   | 1.3        | 0.8 | 2.1  | .       | 1.2           | 0.7 | 1.9  | .       |
| Q4                                   | 1.2        | 0.6 | 2.1  | .       | 1.1           | 0.6 | 2.0  | .       |
| Q5 (Highest)                         | reference  |     |      |         | reference     |     |      |         |
| <b>No. of children in household*</b> |            |     |      |         |               |     |      |         |
| 1 child                              | reference  |     |      |         | reference     |     |      |         |
| 2 children                           | 0.9        | 0.6 | 1.4  | 0.6273  | 0.9           | 0.6 | 1.5  | 0.0026  |
| 3 children                           | 1.0        | 0.6 | 1.5  | .       | 1.2           | 0.8 | 1.8  | .       |
| 4 children                           | 1.3        | 0.8 | 2.1  | .       | 1.8           | 1.1 | 2.9  | .       |
| 5+ children                          | 1.4        | 0.8 | 2.4  | .       | 2.1           | 1.2 | 3.7  | .       |

\*Number of household with no children were very small to draw plausible inference

95% CI's

## DISCUSSION



1  
2  
3 The mortality and morbidity reporting systems in Bangladesh are poor<sup>[17]</sup>. To inform a large-scale  
4 drowning prevention strategy, we conducted a cross-sectional household survey to provide  
5 otherwise unavailable epidemiological data on drowning in the Barishal Division. Our study found a  
6 mortality rate from drowning of 37.9 per 100,000 per year across all ages in the Barishal division,  
7 which is over three times higher than the national rate reported in 2016 (11.7/100,000/year)<sup>[4]</sup>. The  
8 number of water bodies including rivers, lakes, ponds and ditches in this division is far higher than  
9 the other parts of the country. For both males and females fatal drowning rates were high in infancy,  
10 and peaked at 1-4 years of age, then fell rapidly through middle childhood and adolescence and  
11 remained relatively low throughout adulthood. This pattern of fatal drowning rates across the age  
12 groups in this study is consistent with another recent national survey<sup>[4]</sup>.  
13  
14  
15  
16  
17  
18  
19  
20  
21  
22  
23  
24  
25

26 Previous studies identified nearby ponds, ditches, and canals as the most common location of fatal  
27 drowning among children in Bangladesh<sup>[3, 17-20]</sup>. In the Barishal region, most households are  
28 surrounded by water bodies. Similar to previous studies, this study revealed that the majority of  
29 childhood drowning deaths occurred in ponds, ditches and canals situated within only 100 metres  
30 from their residences. Children are often with other siblings (children) or unaccompanied at the time  
31 of drowning. Lack of supervision in younger children is a major risk factor. Attentiveness and  
32 continuity are essential characteristics of the hierarchical model of supervision,<sup>[21]</sup> proximity to the  
33 water exacerbates risk. However, among adults a considerable proportion of drowning fatalities  
34 occurred at a distance of two kilometres from their houses. It is possible that these deaths occurred  
35 in rivers where individuals were engaged in activities such as fishing or boating.  
36  
37  
38  
39  
40  
41  
42  
43  
44  
45  
46  
47  
48

49 Drowning deaths in Barishal occurred year-round but most frequently during the monsoon season  
50 (June to October); this is similar to findings reported in prior studies<sup>[18, 22-24]</sup>. It is also notable that in  
51 the dry season (November-December) the fatal drowning rates remained relatively high in Barishal.  
52 This is likely because most natural water bodies including those close to households are connected  
53 to the rivers and given much of the division is subject to two high tides where waterbodies are filled  
54  
55  
56  
57  
58  
59  
60

1  
2  
3 twice a day by sea water including the dry season, this can increase the risk of exposure especially  
4  
5 among children playing in water bodies. Previous studies, have also reported over 90% of fatal  
6  
7 drowning events occurred in daylight hours<sup>[17, 25]</sup>.  
8  
9

10 Fatal drowning was strongly and significantly associated with sex with males having over 1.5 times  
11  
12 the odds of death from drowning. This may be related to males greater engagement in risk taking  
13  
14 behaviours and exposure to high risk situations<sup>[26]</sup> or to existing traditional gender roles in  
15  
16 Bangladesh with young boys more likely to be out playing unsupervised whereas girls would be at  
17  
18 home helping with household activities. This points to the need to place specific emphasis on  
19  
20 targeting boys within drowning prevention programs. Age was also significantly related to fatal  
21  
22 drowning with those in the age group of 1-4 years having the greatest risk of drowning. This age  
23  
24 group has consistently been found to be at greater risk of drowning in Bangladesh and other South-  
25  
26 East Asian and Western Pacific countries<sup>[2, 18, 27]</sup> and may be related to challenges to achieve adult  
27  
28 supervision, the lack of swimming ability in this age group and other behavioural factors<sup>[18]</sup>. We did  
29  
30 not find any significant association between mother's education and fatal drowning risk. The socio-  
31  
32 economic status of our study population was fairly homogenous and no associations were reported  
33  
34 across the socio-economic groups. Increased number of children in the household, increased the risk  
35  
36 of drowning events. Households with four or five children in the family were common place. In these  
37  
38 circumstances parents may find it difficult to adequately supervise all of them. These findings  
39  
40 support the need for programmes that can assist families with supervision.  
41  
42  
43  
44  
45  
46  
47  
48  
49

## 50 **STRENGTHS AND LIMITATIONS OF THE STUDY**

51  
52 The strength of this study was that to ensure the quality of data, trained supervisors were recruited,  
53  
54 and they observed 10.0% of interviews conducted by the data collectors, checked 10.0% of the  
55  
56 collected data, and re-interviewed 2.0% of the households. In addition, field level research officers  
57  
58  
59  
60

1  
2  
3 and managers were appointed to re-check all data for inconsistencies. If inconsistency was detected,  
4  
5 the respective data collector was asked to revisit the household to collect correct information.  
6  
7

8 Another strength was that the study used external cause codes of fatal drowning from the ICD – 10  
9  
10 that provided more representative true burden of fatal drowning. In addition to unintentional  
11  
12 external cause of drowning codes, watercraft and flood related drowning, and intentional self-harm  
13  
14 by drowning codes were also included. Studies suggested to include these later codes (watercraft,  
15  
16 flood related and intentional self-harm) to obtain more representative magnitude of fatal drowning  
17  
18 [28, 29] Intentional drownings particularly suicides are culturally stigmatised in Bangladesh. Household  
19  
20 surveys thus are not the best source of data for determining intent of drowning. However, given the  
21  
22 high burden among children, intent has little implications on the study findings.  
23  
24  
25  
26  
27  
28  
29

30 Given that the mortality burden is highest in children aged under five years, it should be noted that  
31  
32 under-reporting in overall mortality rates is an issue in this age group because of poor birth /vital  
33  
34 registration systems, so our results may have under-estimated the true burden. This is likely to affect  
35  
36 data on children aged under-one year to a larger extent. However, given that a two-year recall  
37  
38 period was used in this survey, the fatal drowning rates are likely to be conservative. Although the  
39  
40 proportion of refusals was small (2%), collecting data on reasons for non-participation could have  
41  
42 added to the strength of the study.  
43  
44  
45

46 One of the major challenges in this study was to use the electronic data capturing system with an  
47  
48 intent to obtain real time data. Each data collector was given a tablet loaded with REDCap  
49  
50 application, and a sim was inserted in the device to obtain wireless internet connection. However, in  
51  
52 the remote locations the internet connectivity was very poor and initially the data collectors could  
53  
54 not upload their collected data from the site of data collection. To resolve this issue, offline data  
55  
56 collection system was created in the software. Each day after data collection in the afternoon the  
57  
58 data collectors returned to the local office to get a high quality Wifi connection to upload their data.  
59  
60

1  
2  
3 To best of our knowledge, this is the first survey using offline application for electronic data capture  
4 (Redcap), in the region. The survey was huge with over 250 variables collecting information on  
5  
6 multiple drowning events in each household. With English and Bangla translations, the screen size of  
7  
8 a hand held Android device posed challenge for accuracy in data entry, which was mitigated by  
9  
10 division of survey into multiple sections/tools and optimising the font size. Bi-lingual presentation  
11  
12 was essential, as statistical programmes are primarily compatible with English, only.  
13  
14  
15  
16

17 The contextual issues for example access to electricity for charging of devices, access to internet or  
18  
19 recharging the power banks also needed to be considered. Some of the learnings that have since led  
20  
21 to enhanced features within the Redcap application are synchronising of auto-generated  
22  
23 identification on an offline application, preventing data loss or duplication of data. It is due to the  
24  
25 success of using electronic data capture and utilising internal validity checks that the high quality and  
26  
27 completeness of the dataset was achieved.  
28  
29  
30

31 The survey was purposively conducted in Barishal division which is one of the eight divisions of  
32  
33 Bangladesh. In previous national injury surveys the highest drowning mortality rate among children  
34  
35 was observed in the Pirojpur district of Barishal division<sup>[3]</sup>. Considering this high rate the Barishal  
36  
37 division was selected for Project Bhasa.  
38  
39  
40

41 The study findings highlight the very high magnitude of drowning deaths in the Barishal division.  
42  
43 Socio-demographic factors including being male, aged 1-4 years and having five or more children in  
44  
45 households was associated with increased risk of fatal drowning. The findings further demonstrate  
46  
47 that drowning is predominantly a problem that affects children in Bangladesh. The Barishal division  
48  
49 demands urgent interventions targeted at high risk groups identified here. Project Bhasa aims to  
50  
51 provide evidence-based interventions, including community day-care for under-five children to  
52  
53 ensure adult supervision during day time and providing swimming instruction and school water  
54  
55 safety education to children aged five years and over, to reduce drowning. It is expected that the  
56  
57  
58  
59  
60

1  
2  
3 project will generate knowledge to assist with drowning reduction efforts both nationally and in  
4  
5 other similar settings.  
6  
7  
8  
9

## 10 11 **ACKNOWLEDGEMENTS**

12  
13  
14 This research was a part of “Project BHASA” - a Comprehensive Drowning Reduction Strategy. We  
15 thank Royal National Lifeboat Institution (RNLI) UK, The George Institute for Global Health (TGI),  
16 Australia and the Directorate General of Health Services (DGHS), Ministry of Health and Family  
17 Welfare (MoHFW), Government of the People’s Republic of Bangladesh for their support in the  
18 study. We gratefully acknowledge Professor AHM Enayet Hussain, Additional Director General,  
19 DGHS, MoHFW to Chair the National Steering Committee for the Project *Bhasa* and also for  
20 providing all necessary administrative support to accomplish the baseline survey. We also would like  
21 to thank Steve Wills and Ashim Kumar Saha for their contribution during data collection.  
22  
23  
24  
25  
26  
27  
28  
29

## 30 31 **CONTRIBUTORS**

32  
33 AR participated in the design, implementation and supervision of field work and analysis and wrote  
34 the paper. JJ contributed on project design, data analysis and writing of the paper. KB and MJH  
35 contributed on project design, implementation, Data management and supervision of field work and  
36 writing of the paper. DR contributed on project design and writing of the paper. TA and KR were  
37 involved in data management and analysis and contributed to write the paper. RI and FR conceived  
38 the study and supervised throughout and contributed to the writing of the paper. RI and FR are the  
39 guarantors.  
40  
41  
42  
43  
44  
45

## 46 47 **FUNDING**

48  
49 The research was funded by Royal National Life Boat Institution (RNLI), UK  
50  
51

## 52 53 **COMPETING INTERESTS**

54  
55 Authors declare no conflict of interest.  
56  
57

## 58 59 **ETHICAL APPROVAL**

60

1  
2  
3 Obtained  
4  
5

## 6 **PROVENANCE AND PEER REVIEW**

7

8  
9 Not commissioned; externally peer reviewed.  
10

## 11 **DATA SHARING STATEMENT**

12

13  
14 We have de-identified data which are available at Centre for Injury Prevention and Research,  
15 Bangladesh and The George Institute for Global Health. This was the baseline survey data generated  
16 from BHASA project which is a collaborative work of Royal National Lifeboat Institution, Centre for  
17 Injury Prevention and Research, Bangladesh and The George Institute for Global Health. Royal  
18 National Lifeboat Institution funded to conduct the research work. The mentioned organisations  
19 have rights to use the data. Data are available upon request to Dr Aminur Rahman  
20 (aminur@ciprb.org) and Dr. Jagnoor Jagnoor (jjagnoor@georgeinstitute.org.au).  
21  
22  
23  
24  
25  
26  
27  
28  
29

30  
31 Figure 1: *Map of the Barishal division – the study area*  
32

33  
34 Figure 2: *Distribution of fatal drowning by type of water bodies (2a) and their use (2b)*  
35

36  
37 Figure 3: *Distribution of fatal drowning by time of the year in Barishal Division, Bangladesh*  
38

39  
40 Figure 4: *Distribution of fatal drowning by time of the day in Barishal Division, Bangladesh*  
41  
42  
43  
44

## 45 **REFERENCES**

46  
47  
48  
49

- 50 1. World Health Organisation, *Global Health Estimates 2016: Deaths by Cause, Age, Sex, by*  
51 *Country and by Region, 2000-2016*. 2016, World Health Organization: Geneva, Switzerland.
- 52 2. World Health Organisation, *Global report on drowning: preventing a leading killer*. 2014, The  
53 World Health Organisation (WHO): Geneva, Switzerland.
- 54 3. Rahman, A., et al., *Bangladesh Health and Injury Survey Report on Children*. 2005, Directorate  
55 General of Health Services (DGHS), Ministry of Health & Family Welfare (MOHFW),  
56 Government of the People's Republic of Bangladesh, Institute of Child & Mother Health  
57  
58  
59  
60

- 1  
2  
3 (ICMH), United Nations Children's Fund (UNICEF), The Alliance for Safe Children (TASC):  
4 Dhaka, Bangladesh.  
5  
6  
7 4. Rahman, A., *Bangladesh Health and Injury Survey Report on Children 2016*. (unpublished),  
8 Centre for Injury Prevention and Research, Bangladesh: Dhaka, Bangladesh.  
9  
10 5. NIPORT, Mitra and Associates, and ICF International, *Bangladesh Demographic and Health*  
11 *Survey 2011* 2013, NIPORT, Mitra and Associates, and ICF International: Dhaka, Bangladesh  
12 and Calverton, Maryland, USA.  
13  
14 6. UNU-EHS and Bündnis Entwicklung Hilft, *World Risk Report 2015*. 2015, Bündnis Entwicklung  
15 Hilft (Alliance Development Works) and United Nations University – Institute for Environment  
16 and Human Security (UNU-EHS): Berlin.  
17  
18 7. Department of Disaster Management Bangladesh, *Disaster Report 2013*. 2015, Department of  
19 Disaster Management, Ministry of Disaster Management and Relief, Government of the  
20 People's Republic of Bangladesh: Dhaka, Bangladesh.  
21  
22 8. Azad, A., *Riverine Passenger Vessel Disaster in Bangladesh : Options for Mitigation and Safety*.  
23 2009, BRAC University: Dhaka, Bangladesh.  
24  
25 9. IWM, *Policy Brief: Local Level Hazard Maps for Flood, Storm, Surge and Salinity*. 2014, Institute  
26 of Water Modelling (IWM): Dhaka, Bangladesh.  
27  
28 10. Harris, D.R., Lemeshow, Stanley, *Evaluation of the EPI survey methodology for estimating*  
29 *relative risk*. World Health Stat Q, 1991. **44**(3): p. 107-14.  
30  
31 11. World Health Organisation, *International Statistical Classification of Diseases and Related*  
32 *Health Problems 10th Revision (ICD-10)*. 2016, The World Health Organization: Geneva,  
33 Switzerland.  
34  
35 12. van Beeck, E.F., et al., *A new definition of drowning: towards documentation and prevention*  
36 *of a global public health problem*. Bull World Health Organ, 2005. **83**(11): p. 853-6.  
37  
38 13. Passmore, J.W., J.O. Smith, and A. Clapperton, *True burden of drowning: compiling data to*  
39 *meet the new definition*. International Journal of Injury Control and Safety Promotion, 2007.  
40 **14**(1): p. 1-3.  
41  
42 14. Serina, P., et al., *What is the optimal recall period for verbal autopsies? Validation study based*  
43 *on repeat interviews in three populations*. Population Health Metrics, 2016. **14**(40).  
44  
45 15. Harris, P., et al., *Research Electronic Data Capture (REDCap) - A metadata driven methodology*  
46 *and workflow process for providing translational research informatic support*. J Biomed  
47 Inform., 2009. **42**(2): p. 377–81.  
48  
49 16. Bangladesh Bureau of Statistics, *Bangladesh Statistics 2017*. 2017, Ministry of Planning:  
50 Dhaka.  
51  
52 17. Rahman, A., et al., *Epidemiology of Drowning in Bangladesh: An Update*. Int J Environ Res  
53 Public Health, 2017. **14**(5): p. 1-11.  
54  
55 18. Rahman, A., et al., *Analysis of the childhood fatal drowning situation in Bangladesh: exploring*  
56 *prevention measures for low-income countries*. Inj Prev, 2009. **15**(2): p. 75-9.  
57  
58  
59  
60

19. Ahmed, M.K., M. Rahman, and J. van Ginneken, *Epidemiology of child deaths due to drowning in Matlab, Bangladesh*. *Int J Epidemiol*, 1999. **28**(2): p. 306-11.
20. Hyder, A.A., et al., *Death from drowning: defining a new challenge for child survival in Bangladesh*. *Inj Control Saf Promot*, 2003. **10**(4): p. 205-10.
21. Saluja, G., et al., *The role of supervision in child injury risk: definition, conceptual and measurement issues*. *Inj. Control Saf. Promot.*, 2004. **11**: p. 17–22.
22. Rahman, F., et al., *Cost-effectiveness of an injury and drowning prevention program in Bangladesh*. *Pediatrics*, 2012. **130**(6): p. e1621-e1628.
23. Linnan, M., et al., *Child Mortality and Injury in Asia: Survey results and evidence*, in *Innocenti Working Paper 2007-06, Special Series on Child Injury No. 3*. 2007, UNICEF Innocenti Research Centre: Florence. p. 64-87.
24. Rahman F, Andersson R, and S. L., *Health Impact of Injuries: A Population-Based Epidemiological Investigation in a Local Community of Bangladesh*. *J Safety Res*, 1998. **29**(4): p. 213-22.
25. Hossain, M., et al., *Socio-demographic, environmental and caring risk factors for childhood drowning deaths in Bangladesh*. *BMC Pediatr*, 2015. **15**: p. 114.
26. Croft, J.L. and C. Button, *Interacting Factors Associated with Adult Male Drowning in New Zealand*. *PLoS One*, 2015. **10**(6): p. e0130545.
27. Yang, L., et al., *Risk factors for childhood drowning in rural regions of a developing country: a case-control study*. *Injury prevention*, 2007. **13**(3): p. 178-182.
28. Peden, A., Franklin, R, Mahony, A, Scarr, J, Barnsley, P, *Using a retrospective cross-sectional study to analyse unintentional fatal drowning in Australia: ICD-10 coding based methodologies verses actual deaths*. *BMJ Open*, 2017. **7**.
29. Cenderadewi, M., Franklin, R , Peden, A, Devine S, *Pattern of intentional drowning mortality: a total population retrospective cohort study in Australia, 2006-2014*. *BMC Public Health*, 2019. **19**.



1  
2  
3  
4  
5  
6  
7  
8  
9  
10  
11  
12  
13  
14  
15  
16  
17  
18  
19  
20  
21  
22  
23  
24  
25  
26  
27  
28  
29  
30  
31  
32  
33  
34  
35  
36  
37  
38  
39  
40  
41  
42  
43  
44  
45  
46  
47  
48  
49  
50  
51  
52  
53  
54  
55  
56  
57  
58  
59  
60

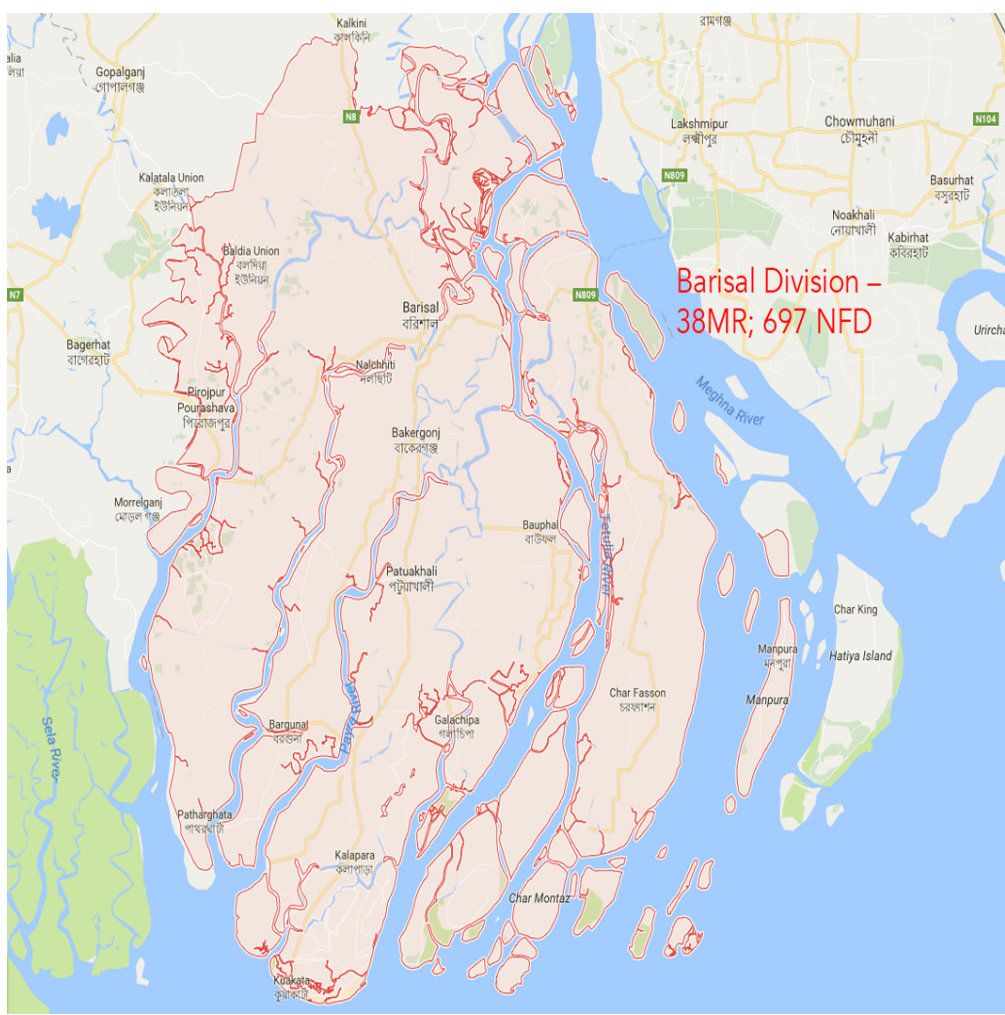

Figure 1: Map of the Barishal Division - the study area

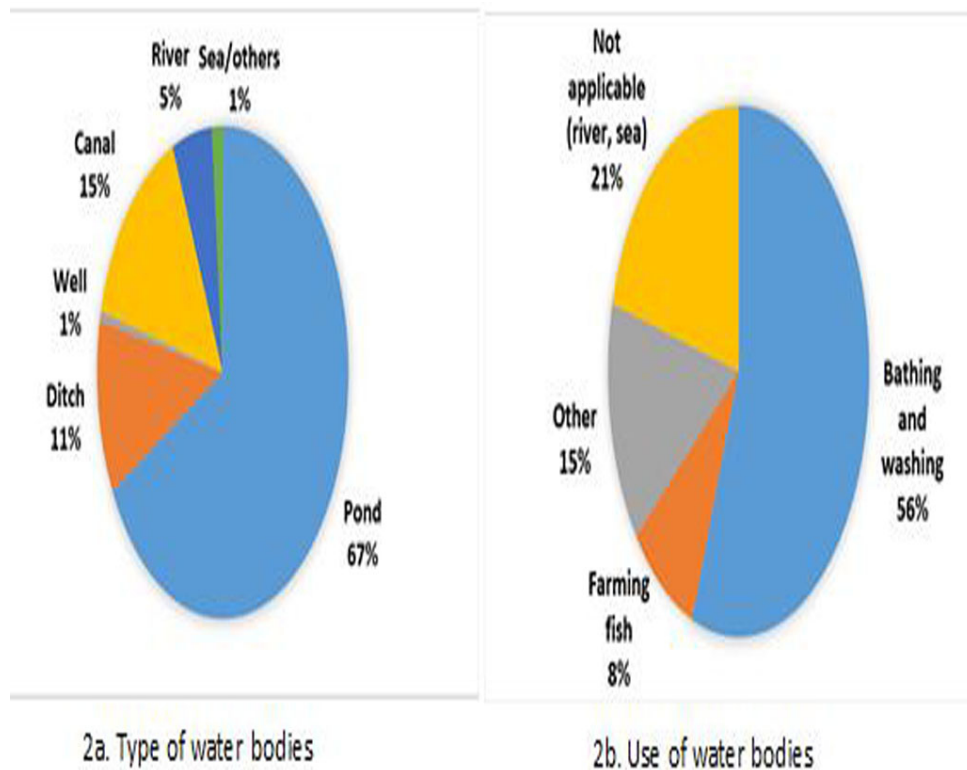

Figure 2: Distribution of fatal drowning by type of water bodies (2a) and their use (2b)

Figure 2: Drowning by types and use of water bodies

90x90mm (300 x 300 DPI)

1  
2  
3  
4  
5  
6  
7  
8  
9  
10  
11  
12  
13  
14  
15  
16  
17  
18  
19  
20  
21  
22  
23  
24  
25  
26  
27  
28  
29  
30  
31  
32  
33  
34  
35  
36  
37  
38  
39  
40  
41  
42  
43  
44  
45  
46  
47  
48  
49  
50  
51  
52  
53  
54  
55  
56  
57  
58  
59  
60

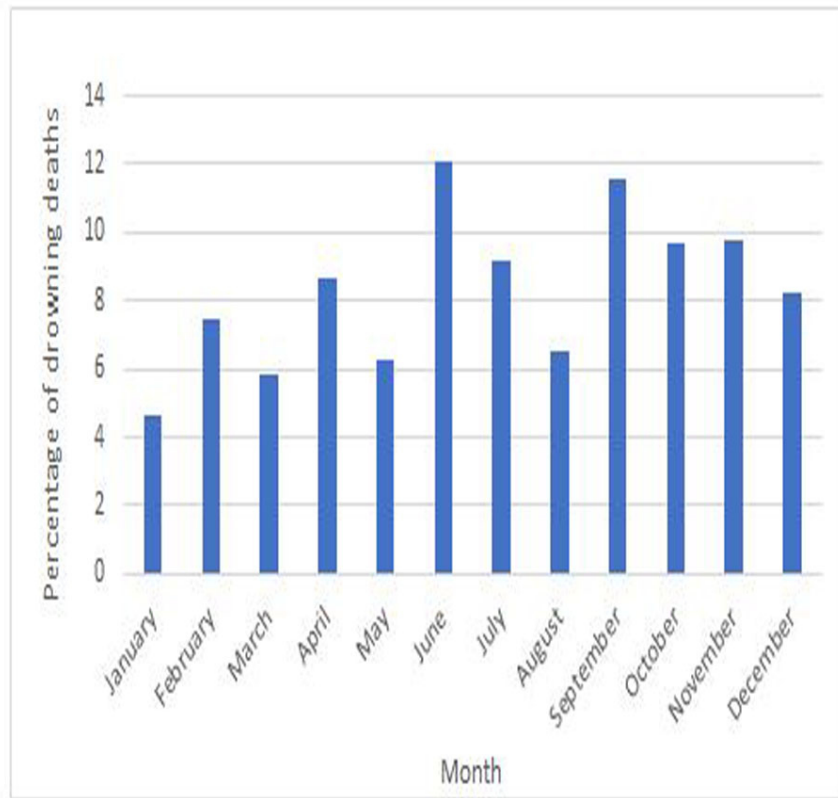

*Figure 3. Distribution of fatal drowning by time of the year in Barishal Division, Bangladesh*

Figure 3: Drowning by time of year

90x90mm (300 x 300 DPI)

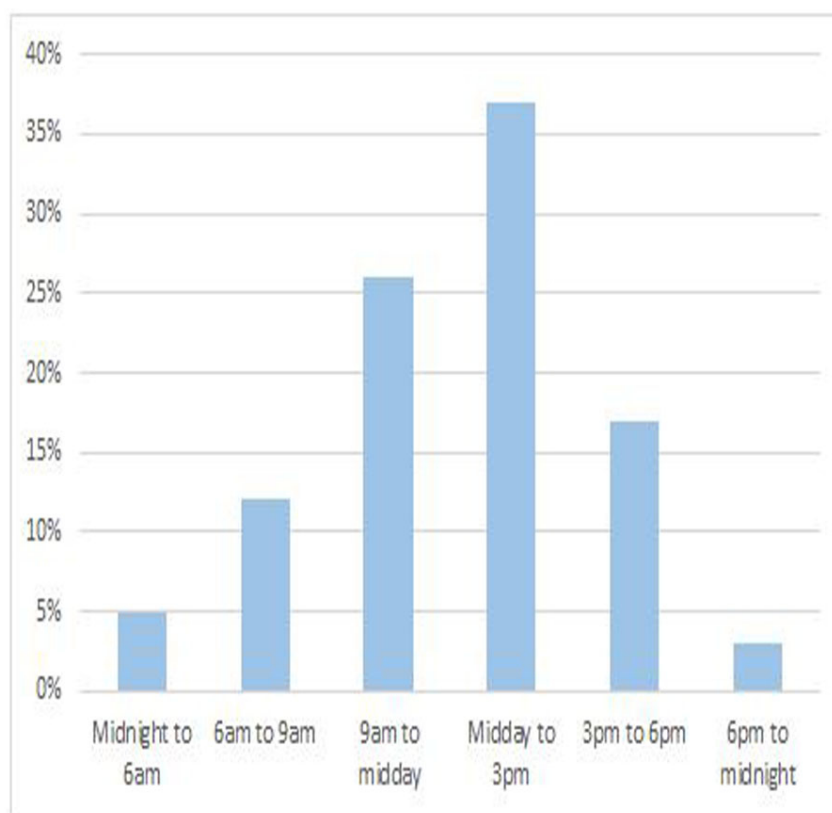

*Figure 4. Distribution of fatal drowning by time of the day in Barishal Division, Bangladesh*

Figure 4: Drowning by time of day

90x90mm (300 x 300 DPI)

## STROBE Statement

**Vulnerability to fatal drowning among the population in Southern Bangladesh: findings from a cross-sectional household survey**

|                              | Item No | Recommendation                                                                                                                                                                                    | Page and Line Number(s)    |
|------------------------------|---------|---------------------------------------------------------------------------------------------------------------------------------------------------------------------------------------------------|----------------------------|
| <b>Title and abstract</b>    | 1       | (a) Indicate the study's design with a commonly used term in the title or the abstract                                                                                                            | P2, L13                    |
|                              |         | (b) Provide in the abstract an informative and balanced summary of what was done and what was found                                                                                               | P2, L13-38                 |
| <b>Introduction</b>          |         |                                                                                                                                                                                                   |                            |
| Background/rationale         | 2       | Explain the scientific background and rationale for the investigation being reported                                                                                                              | P5, L3-23                  |
| Objectives                   | 3       | State specific objectives, including any pre-specified hypotheses                                                                                                                                 | P5, L15-22                 |
| <b>Methods</b>               |         |                                                                                                                                                                                                   |                            |
| Study design                 | 4       | Present key elements of study design early in the paper                                                                                                                                           | P5, L36-45                 |
| Setting                      | 5       | Describe the setting, locations, and relevant dates, including periods of recruitment, exposure, follow-up, and data collection                                                                   | P5, L36-41                 |
| Participants                 | 6       | (a) Give the eligibility criteria, and the sources and methods of selection of participants                                                                                                       | P5, L40-43<br>P6, L39-43   |
| Variables                    | 7       | Clearly define all outcomes, exposures, predictors, potential confounders, and effect modifiers. Give diagnostic criteria, if applicable                                                          | P6, L3-31                  |
| Data sources/<br>measurement | 8*      | For each variable of interest, give sources of data and details of methods of assessment (measurement). Describe comparability of assessment methods if there is more than one group              | P5, L51-54<br>P6, L37-38   |
| Bias                         | 9       | Describe any efforts to address potential sources of bias                                                                                                                                         | P6, L57-60                 |
| Study size                   | 10      | Explain how the study size was arrived at                                                                                                                                                         | P5, L40-45                 |
| Quantitative variables       | 11      | Explain how quantitative variables were handled in the analyses. If applicable, describe which groupings were chosen and why                                                                      | P7, L12-21                 |
| Statistical methods          | 12      | (a) Describe all statistical methods, including those used to control for confounding                                                                                                             | P7, L12-21                 |
|                              |         | (b) Describe any methods used to examine subgroups and interactions                                                                                                                               | P7, L3-8                   |
|                              |         | (c) Explain how missing data were addressed                                                                                                                                                       | P6, L44-47<br>P7, L22      |
|                              |         | (d) If applicable, describe analytical methods taking account of sampling strategy                                                                                                                | P7, L12-17                 |
|                              |         | (e) Describe any sensitivity analyses                                                                                                                                                             | N/A                        |
| <b>Results</b>               |         |                                                                                                                                                                                                   |                            |
| Participants                 | 13*     | (a) Report numbers of individuals at each stage of study—eg numbers potentially eligible, examined for eligibility, confirmed eligible, included in the study, completing follow-up, and analysed | P7, L45-55                 |
|                              |         | (b) Give reasons for non-participation at each stage                                                                                                                                              | Not provided, less than 5% |
|                              |         | (c) Consider use of a flow diagram                                                                                                                                                                | N/A                        |

|                          |     |                                                                                                                                                                                                              |                                                                                                  |
|--------------------------|-----|--------------------------------------------------------------------------------------------------------------------------------------------------------------------------------------------------------------|--------------------------------------------------------------------------------------------------|
| Descriptive data         | 14* | (a) Give characteristics of study participants (eg demographic, clinical, social) and information on exposures and potential confounders                                                                     | P7, L47-53                                                                                       |
|                          |     | (b) Indicate number of participants with missing data for each variable of interest                                                                                                                          | P7, L21-22                                                                                       |
| Outcome data             | 15* | Report numbers of outcome events or summary measures                                                                                                                                                         | P7, L52-55                                                                                       |
| Main results             | 16  | (a) Give unadjusted estimates and, if applicable, confounder-adjusted estimates and their precision (eg, 95% confidence interval). Make clear which confounders were adjusted for and why they were included | P8, L31-56                                                                                       |
|                          |     | (b) Report category boundaries when continuous variables were categorized                                                                                                                                    | N/A                                                                                              |
|                          |     | (c) If relevant, consider translating estimates of relative risk into absolute risk for a meaningful time period                                                                                             | N/A                                                                                              |
| Other analyses           | 17  | Report other analyses done—eg analyses of subgroups and interactions, and sensitivity analyses                                                                                                               | P9, L11-3-<br>P9, L32-49<br>P9, L54-59<br>P10, L6-13<br>P10, L21-29<br>P10, L34-50<br>P11, L7-50 |
| <b>Discussion</b>        |     |                                                                                                                                                                                                              |                                                                                                  |
| Key results              | 18  | Summarise key results with reference to study objectives                                                                                                                                                     | P12, 9-30                                                                                        |
| Limitations              | 19  | Discuss limitations of the study, taking into account sources of potential bias or imprecision. Discuss both direction and magnitude of any potential bias                                                   | P14, L10-20                                                                                      |
| Interpretation           | 20  | Give a cautious overall interpretation of results considering objectives, limitations, multiplicity of analyses, results from similar studies, and other relevant evidence                                   | P13, L17-51                                                                                      |
| Generalisability         | 21  | Discuss the generalisability (external validity) of the study results                                                                                                                                        | P14, L47-52                                                                                      |
| <b>Other information</b> |     |                                                                                                                                                                                                              |                                                                                                  |
| Funding                  | 22  | Give the source of funding and the role of the funders for the present study and, if applicable, for the original study on which the present article is based                                                | P15, L43                                                                                         |

\*Give information separately for exposed and unexposed groups.

**Note:** An Explanation and Elaboration article discusses each checklist item and gives methodological background and published examples of transparent reporting. The STROBE checklist is best used in conjunction with this article (freely available on the Web sites of PLoS Medicine at <http://www.plosmedicine.org/>, Annals of Internal Medicine at <http://www.annals.org/>, and Epidemiology at <http://www.epidem.com/>). Information on the STROBE Initiative is available at [www.strobe-statement.org](http://www.strobe-statement.org).

# BMJ Open

## Vulnerability to fatal drowning among the population in Southern Bangladesh: findings from a cross-sectional household survey

|                                 |                                                                                                                                                                                                                                                                                                                                                                                                                                                                                                                                                                                                                                                                                                                                                                    |
|---------------------------------|--------------------------------------------------------------------------------------------------------------------------------------------------------------------------------------------------------------------------------------------------------------------------------------------------------------------------------------------------------------------------------------------------------------------------------------------------------------------------------------------------------------------------------------------------------------------------------------------------------------------------------------------------------------------------------------------------------------------------------------------------------------------|
| Journal:                        | <i>BMJ Open</i>                                                                                                                                                                                                                                                                                                                                                                                                                                                                                                                                                                                                                                                                                                                                                    |
| Manuscript ID                   | bmjopen-2018-027896.R3                                                                                                                                                                                                                                                                                                                                                                                                                                                                                                                                                                                                                                                                                                                                             |
| Article Type:                   | Original research                                                                                                                                                                                                                                                                                                                                                                                                                                                                                                                                                                                                                                                                                                                                                  |
| Date Submitted by the Author:   | 25-Aug-2019                                                                                                                                                                                                                                                                                                                                                                                                                                                                                                                                                                                                                                                                                                                                                        |
| Complete List of Authors:       | Rahman, Aminur; Centre for Injury Prevention and Research Bangladesh (CIPRB), International Drowning Research Centre - Bangladesh (IDRC-B)<br>Jagnoor, Jagnoor; The George Institute for Global Health, University of Sydney<br>Baset, Kamran; International Drowning Research Centre-Bangladesh (IDRC-B)<br>Ryan, Dan; Royal National Lifeboat Institution<br>Ahmed, Tahera; International Drowning Research Centre-Bangladesh (IDRC-B)<br>Rogers, Kris; The George Institute for Global Health, University of Sydney<br>Hossain, Mohammad; International Drowning Research Centre-Bangladesh (IDRC-B)<br>Ivers, Rebecca; The George Institute for Global Health, University of Sydney<br>Rahman, AKM; International Drowning Research Centre-Bangladesh (IDRC-B) |
| <b>Primary Subject Heading</b>: | Public health                                                                                                                                                                                                                                                                                                                                                                                                                                                                                                                                                                                                                                                                                                                                                      |
| Secondary Subject Heading:      | Epidemiology                                                                                                                                                                                                                                                                                                                                                                                                                                                                                                                                                                                                                                                                                                                                                       |
| Keywords:                       | drowning, Fatal drowning, mortality, injury, risk factor, Bangladesh                                                                                                                                                                                                                                                                                                                                                                                                                                                                                                                                                                                                                                                                                               |
|                                 |                                                                                                                                                                                                                                                                                                                                                                                                                                                                                                                                                                                                                                                                                                                                                                    |

SCHOLARONE™  
Manuscripts

1  
2  
3 **Vulnerability to fatal drowning among the population in Southern Bangladesh: findings**  
4 **from a cross-sectional household survey**  
5  
6  
7

8 Aminur Rahman<sup>1\*</sup>, Jagnoor Jagnoor<sup>2</sup>, Kamran-ul-Baset<sup>1</sup>, Dan Ryan<sup>3</sup>, Tahera Ahmed<sup>1</sup>, Kris Rogers<sup>2</sup>,  
9 Mohammad Jahangir Hossain<sup>1</sup>, Rebecca Ivers<sup>2</sup>, AKM Fazlur Rahman<sup>1</sup>  
10  
11  
12  
13  
14  
15  
16  
17

18 \*Corresponding Author  
19

20  
21 <sup>1</sup> International Drowning Research Centre – Bangladesh, Centre for Injury Prevention and Research,  
22 Bangladesh  
23

24 Dhaka, Bangladesh  
25

26 House B162, Road No. 23,  
27

28 New DOHS, Mohakhali  
29

30 Dhaka Bangladesh 1206  
31

32 Email: aminur@ciprb.org  
33

34 Phone: +88-02-58814988  
35  
36  
37  
38  
39  
40  
41  
42  
43  
44  
45  
46  
47  
48  
49

50 <sup>2</sup> The George Institute for Global Health, Injury Division, University of New South Wales, Australia  
51

52 <sup>3</sup> Royal National Lifeboat Institution (RNLI), Poole, UK  
53  
54  
55  
56  
57  
58  
59  
60



**ABSTRACT**

**Objectives:** To determine the fatal drowning burden and associated risk factors in Southern Bangladesh.

**Settings:** The survey was conducted in 39 sub-districts of all six districts of the Barishal division, Southern Bangladesh.

**Participants:** All residents (for a minimum 6 months prior to survey) of the Barishal division, Southern Bangladesh.

**Intervention/methods:** A cross-sectional, divisionally representative household survey was conducted in all six districts of the Barishal division between September 2016 and February 2017, covering a population of 386,016. Data were collected by face-to-face interview with adult respondents using handheld electronic tablets. ICD-10 Chapter XX: External causes of morbidity and mortality codes for drowning W65 – W74, X36 – X39, V90, V92, X71 or X92, were used as the operational definition of a drowning event .

**Results:** The overall fatal drowning rate in Barishal was 37.9/100,000 population per year (95% CI 31.8–43.9). The highest fatal drowning rate was observed among children aged 1-4 years (262.2/100,000/year). Mortality rates among males (48.2/100,000/year) exceeded females (27.9/100,000/year). A higher rate of fatal drowning was found in rural (38.9/100,000/year) compared to urban areas (29.3/100,000/year). Results of the multivariable logistic regression identified that the factors significantly associated with fatal drowning were being male sex (OR 1.7, 95% CI: 1.2 - 2.3), aged 1-4 years (OR 3.0, 95% CI 1.4 - 6.4) and residing in a household with 4 or more children (4 or more children OR 1.8, 1.1 – 2.9; and 5 or more children OR 2.1, 1.2 – 3.7).

**Conclusion:** Drowning is a public health problem, especially for children, in the Barishal division of Southern Bangladesh. Male gender, children 1-4 years of age and residing in a household with 4 or more children were associated with increased risk of fatal drowning events. The Barishal division demands urgent interventions targeted at high risk groups identified in the survey.

**Trial Registry:** Not applicable

**Key words:** Drowning, fatal drowning, mortality, injury, risk factor, Bangladesh

**ARTICLE SUMMARY****Strengths and limitations of this study**

- A key strength of this study was the large divisionally representative sample of Barishal division in Bangladesh, to guide contextual implementation of effective interventions.
- The study used multiple methods for quality control, of significance are the learnings from use of electronic data capture system with low access to internet.
- Limitations included the cross-sectional nature of the study which may have introduced recall bias. Although the proportion of refusals was small (2%), collecting data on reasons for non-participation could have added to the strength of the study.
- Under reporting in overall mortality rates is a concern for children under five years and may have contributed to an under-estimate of the true mortality in this age group.

## INTRODUCTION

An estimated 322,149 annual drowning deaths occur globally, making fatal drowning a major global health problem<sup>[1]</sup>. Half of all drowning fatalities occur in people under the age of 25 with children aged between 1 – 4 years the most vulnerable. More than 90% of drowning incidents take place in low- and middle-income countries (LMICs) where men, women and children have a higher exposure to the risks associated with open water<sup>[2]</sup>. According to the 2012 WHO Global Health Estimates, the global mortality rate from drowning was 5.2 per 100,000 population with the highest rates observed in the African Region (7.9 per 100,000 population) followed by South-East Asia Region (7.4 per 100,000 population)<sup>[2]</sup>.

In 2005, the first Bangladesh Health and Injury Survey (BHIS), identified drowning as the leading cause of death among children 1-17 years with approximately 17,000 children dying each year<sup>[3]</sup>. In 2016, the BHIS was carried out for the second time and again drowning was found to be the main cause of injury deaths among children aged 1-4 and 5-9 years. According to the 2016 BHIS, every day 40 children (aged between 0-17 years) lost their life due to drowning and this was the highest among all injury fatalities. Among adults (aged 18 years or more) there were 13 deaths from drowning per day and this was the sixth leading cause of injury death in that age category<sup>[4]</sup>. The 2011 Bangladesh Demographic Health Survey (BDHS) found that while the risk of dying from other conditions, such as vaccine preventable communicable diseases, had significantly decreased, fatalities from drowning among children aged 1-4 years rose alarmingly from 19.0% in 2004 to 43.0% in 2011<sup>[5]</sup>.

Bangladesh is a highly disaster prone country, ranked sixth in the 2015 World Risk Report<sup>[6]</sup>. It is especially vulnerable to cyclones and frequent flooding which claim many lives each year<sup>[7]</sup>. The country is intersected by many rivers, drowning during inland water transport accidents is also common<sup>[8]</sup>.

The 2005 BHIS identified that the highest mortality rate due to drowning occurred in the Pirojpur district of Barishal division in Bangladesh<sup>[3]</sup>. Geographically, the Barishal division is located in the

1  
2  
3 central southern region of Bangladesh where several large rivers converge; with a land mass of  
4  
5 13,644.85 km<sup>2</sup> and a population of 8,147,000. As a low lying, coastal division, Barishal is vulnerable  
6  
7 to natural hazards and the effects of climate change. All six districts under this division are regularly  
8  
9 affected by water-related hazards<sup>[9]</sup>.

10  
11  
12 Considering these factors, Project *Bhasa*, a Comprehensive Drowning Reduction Strategy was  
13  
14 designed to reduce fatal drowning and morbidity utilizing evidence-based interventions. As part of  
15  
16 this initiative, a baseline survey was conducted to determine the burden and context of fatal  
17  
18 drowning in the Barishal division of Southern Bangladesh.  
19  
20  
21  
22  
23  
24

## 25 **METHODS**

26  
27 The *Bhasa* baseline survey was a population-based cross-sectional survey representative to the  
28  
29 Barishal Division, one of the country's eight divisions. Geographically, the division is located in the  
30  
31 central southern region of Bangladesh where several large rivers converge. The survey was  
32  
33 conducted between September 2016 and February 2017 in 39 sub-districts of all six districts  
34  
35 (Barguna, Barishal, Bhola, Jhalokathi, Patuakhali and Pirojpur) of the division. The survey covered  
36  
37 95,063 households comprising 386, 016 population in the selected sub-districts and used a multi-  
38  
39 stage stratified cluster sampling method. The sampling frame for sub-districts was designed to give a  
40  
41 probability of selection proportional to population. Household sampling was conducted using the  
42  
43 WHO EPI approach <sup>[10]</sup>.  
44  
45  
46  
47  
48  
49

## 50 **Measures**

51  
52 The operational definition of injury mortality used in this study was in accordance with ICD - 10  
53  
54 Chapter XX: External causes of morbidity and mortality, recording intent and mechanism of injury  
55  
56 <sup>[11]</sup>. It was defined as, 'any death occurred due to external harm resulting from a fall, burn, cut,  
57  
58 transportation, suffocation, drowning, machine/tool injury, electrocution, animal injury, blunt object  
59  
60

1  
2  
3 injury, poisoning, suicide and violence'. Drowning was described as 'the process of experiencing  
4 respiratory impairment from submersion or immersion in liquid'<sup>[12]</sup>. Drowning deaths were included  
5 if the cause was any of the following external cause codes from ICD-10 Chapter XX: External causes  
6 of morbidity and mortality: codes W65 – W74 (unintentional drowning), X36 – X39 (exposure to  
7 forces of nature –water related, V90 (drowning or submersion due to accident to watercraft), V92  
8 (drowning and submersion due to accident on board watercraft, without accident to watercraft),  
9 X71 (intentional self-harm by drowning and submersion) or X92 (assault by drowning and  
10 submersion while in bath tub)<sup>[11, 13]</sup>.

11  
12 Information on all fatal injuries was collected over a two-year recall period, from the day of survey.  
13  
14 Whilst there is a potential issue of recall bias, previous literature from Verbal Autopsy (VA) reporting  
15 cause of death has shown high validity and sensitivity for up to three years for causes of death  
16 involving injury<sup>[14]</sup>. For all cases of fatal drowning additional information was collected on potential  
17 risk factors. These included socio-demographic characteristics, access to water, and pre-event risk  
18 factors (e.g. location and type of water body, activity of the person prior to drowning, person  
19 accompanying prior to drowning, accompanying person's age), event (e.g. time and season of  
20 drowning) and post-drowning events (e.g. time of rescue, person rescued, action taken after rescue).  
21  
22 Information was gathered on knowledge, attitudes and practices related to drowning, drowning  
23 prevention and disaster preparedness. Finally, data were also collected on all mortality and all  
24 causes of injury mortality.

### 25 26 27 28 29 30 31 32 33 34 35 36 37 38 39 40 41 42 43 44 45 46 47 48 49 **Data collection and procedures**

50 Data were collected using a pre-tested structured questionnaire by 50 trained data collectors.  
51  
52 Information was gathered from household heads, mothers or any residing adults aged 18 years or  
53 older through face-to-face interviews after obtaining written informed consent. Each selected  
54 respondent provided information of all household members including children. Each day data  
55 collectors visited 25-30 households to collect information. Non-participation due to refusal was  
56  
57  
58  
59  
60

1  
2  
3 2.0%. To ensure data quality, responsible supervisors randomly re-surveyed 2.0% of the households.

4  
5 An electronic data capturing tool using the REDCap application, was used on tablets for data  
6  
7 collection<sup>[15]</sup>.

## 11 12 **Statistical analysis**

13  
14 In this study, to estimate mortality rates, weights were created for the survey data to appropriately  
15  
16 adjust for differences in probability of selection and response rates according to age and sex. The  
17  
18 probability of selection based on sampling information (number of upazilas that are the sub- districts  
19  
20 of a division, and number of villages) was calculated and then adjusted to the age and sex  
21  
22 distribution from the 2011 Bangladesh Population and Housing Census. All data were analysed using  
23  
24 SAS 9.4 with SAS/STAT 14.2.

25  
26  
27  
28  
29  
30 While analysing mortality rates (per 100,000/population) for fatal drowning and for percentage for  
31  
32 other variables, the Taylor Series method was used. This incorporated the survey weights and the  
33  
34 other features of the survey design (stratification by district, and cluster sampling of villages).

35  
36 Multivariable logistic regression was used to examine associations between various socio-  
37  
38 demographic factors with fatal drowning. Due to electronic data capture and in-built internal validity  
39  
40 checks, missing data was minimised with only 1.01%; 977 records were excluded due to missing  
41  
42 data. Denominator population data was based on Bangladesh Bureau of Statistics, accommodating  
43  
44 for a growth rate of 1.37 from the 2011 census <sup>[16]</sup>.

## 45 46 47 48 49 50 **Ethical considerations**

51  
52  
53 This study received ethical approvals from the ethical review committee of the Centre for Injury  
54  
55 Prevention and Research, Bangladesh (CIPRB), Bangladesh and the Human Ethics Committee of the  
56  
57 University of Sydney, Australia. The ethics approval numbers were CIPRB/ERC/2016/12 and USyd  
58  
59 HREC - 2016/606 respectively.

## Patient and public involvement statement

This is a community-based household survey. Community leaders were consulted for feedback on the implementation of the survey, and their input sought on the tool for capturing contextually relevant data.

## RESULTS

A total of 95,063 households were visited of which 92,616 household representatives (97.4%) completed the survey. Males and females were equally represented among the sampled population (49.1% vs 50.9%) and over one-third (37.2%) of the population were children under-18 years. A total of 4,128 deaths were reported in the two-year recall period, giving an overall mortality rate of 5.3/100,000 population per year (data not shown).

### *Drowning burden and mortality rates*

Drowning accounted for 6.6% of deaths across all age groups, however among children aged 1-4 years drowning was the cause of more than one-third of all deaths (35.1%). One in ten deaths among infants (<1 year) and children aged 5 to 9 years were a result from drowning (data not shown). In the two-year recall period, there were 285 fatal drownings across all ages giving an all-age drowning mortality rate of 37.9/100,000 population per year (95%CI: 31.8 - 43.9). All fatal drownings were reported to be unintentional. Fatal drowning rates were consistently higher among males compared to females across all ages except among those aged 10-14 years where a higher rate was observed among females. However, this higher rate among 10-14 year girls was not statistically significant.

The highest fatal drowning rates were in children aged 1-4 years at 262.2/100,000 per year (95% CI: 216.4 - 308.0) followed by infants (88.6/100,000) then children aged 5-9 years (65.1/100,000). In

early adolescence (10-14 years) fatal drowning rates decreased but increased again in early adulthood (18-24 years) and among those aged 60 years and over where higher rates of fatal drownings were observed (Table 1).

Table 1. Drowning deaths and mortality rates by age and sex in the Barishal division, Bangladesh

| Sex          | Male                    |                         |                   | Female                  |                         |                 | All persons             |                         |                   | National Rate both sex BHIS 2016 <sup>1</sup> |                   |
|--------------|-------------------------|-------------------------|-------------------|-------------------------|-------------------------|-----------------|-------------------------|-------------------------|-------------------|-----------------------------------------------|-------------------|
| AGE (years ) | Numerator (Denominator) | Rate (per 100,000/year) | 95% CI (LL, UL)   | Numerator (Denominator) | Rate (per 100,000/year) | 95% CI (LL, UL) | Numerator (Denominator) | Rate (per 100,000/year) | 95% CI (LL, UL)   | Rate (per 100,000/year)                       | 95% CI (LL - UL)  |
| <1           | 7 (3389)                | 142.9                   | 22.9, 263.0       | 3 (3380)                | 34.8                    | 0, 81.9         | 10 (6769)               | 88.6                    | 25.4, 151.9       | 53.3                                          | 2.8 - 345.8       |
| 1 to 4       | 96 (14147)              | 325.3                   | 252.6, 398.0      | 74 (14192)              | 199.8                   | 143.1, 256.5    | 170 (28339)             | 262.2                   | 216.4, 308.0      | 71.7                                          | 31.4 - 154.8      |
| 5 to 9       | 31 (21454)              | 78.7                    | 48.9, 108.4       | 21 (20640)              | 51.8                    | 25.1, 78.4      | 52 (42094)              | 65.1                    | 42.4, 87.9        | 28.1                                          | 9.0 - 77.3        |
| 10 to 14     | 5 (23085)               | 9.3                     | 0, 18.8           | 9 (22765)               | 28.2                    | 6.7, 49.8       | 14 (45850)              | 18.9                    | 7.2, 30.5         | 3.2                                           | 0.0 - 36.2        |
| 15 to 17     | 6 (11094)               | 21.1                    | 2.8, 39.3         | 0 (9240)                | -                       | -               | 6 (20334)               | 11.2                    | 1.5, 20.9         | 5.6                                           | 0.0 - 63.5        |
| 18 to 24     | 8 (17688)               | 24.1                    | 0, 52.9           | 6 (24638)               | 10.8                    | 1.3, 20.4       | 14 (42326)              | 17.2                    | 2.9, 31.5         | -                                             |                   |
| 25 to 39     | 6 (41449)               | 5.2                     | 0, 10.9           | 1 (49676)               | 1.2                     | 0, 3.5          | 7 (91125)               | 3.1                     | 0.1, 6.1          | 2.5                                           | 0.1 - 16.2        |
| 40 to 59     | 4 (36444)               | 8.1                     | 0, 18.2           | 2 (35568)               | 3.1                     | 0, 7.4          | 6 (72012)               | 5.6                     | 0.1, 11.1         | 8.6                                           | 1.9 - 30.3        |
| 60+          | 5 (20226)               | 22.3                    | 3.6, 40.9         | 1 (16052)               | 3.1                     | 0, 9.1          | 6 (36278)               | 12.6                    | 2.9, 22.2         | 8.8                                           | 0.5 - 56.9        |
| <b>Total</b> | <b>168 (188976)</b>     | <b>48.2</b>             | <b>38.9, 57.4</b> | <b>117 (196151)</b>     | <b>27.9</b>             | <b>21, 34.9</b> | <b>285 (385127)</b>     | <b>37.9</b>             | <b>31.8, 43.9</b> | <b>11.7</b>                                   | <b>7.1 - 19.0</b> |

<sup>1</sup>Rahman A, Chowdhury SM, Mashreky SR, Linnan M, Rahman AKMF. (2016) Report on Bangladesh Health and Injury Survey, DGHS, CIPRB, Dhaka.



Fatal drowning rates were higher in rural areas compared to urban areas of the sub-district (38.9/100,000 vs 29.3 per 100,000), and across all age groups except in infancy (<1 year) and early adulthood (18-24 years) where drowning fatality rates were higher in urban areas (Table 2).

Table 2. Distribution rates of fatal drowning by age and region of residence in the Barisal Division, Bangladesh

| Age (years)  | Rural                     | Urban*                    |
|--------------|---------------------------|---------------------------|
|              | Rate per 100,000 (95% CI) | Rate per 100,000 (95% CI) |
| <1 (infant)* | 79.8 (13.6 - 145.9)       | 160.9 (0.0 - 438.2)       |
| 1-4          | 277.2 (225.7 - 328.6)     | 135.4 (40.8 - 230.0)      |
| 5-9          | 68.9 (43.4 - 94.3)        | 31.5 (0.0 - 66.1)         |
| 10-14        | 18.9 (6.4 - 31.3)         | 18.5 (0.0 - 51.8)         |
| 15-17        | 11.5 (0.7 - 22.3)         | 8.6 (0.0 - 25.3)          |
| 18-24        | 11.0 (3.3 - 18.6)         | 65.7 (0.0 - 177.4)        |
| 25-39        | 3.5 (0.2 - 6.9)           | 0                         |
| 40-59        | 6.3 (0.1 - 12.4)          | 0                         |
| 60+          | 13.9 (3.2 - 24.6)         | 0                         |
| <b>Total</b> | <b>38.9 (32.6 - 45.3)</b> | <b>29.3 (6.5 - 52.1)</b>  |

\*The event rate for infants and urban areas are very small, reporting very wide confidence interval

### ***Drowning by distance of water body from households, type of water body, activity, seasonality and time of the day***

Across all age categories about three quarters of fatal drowning events occurred within 100 metres of the households. However, among adolescents aged 15-17 years and adults aged 40 years and above over 20.0% of drowning deaths occurred at a distance of over two kilometres (data not shown).

The majority (98.0%) of drowning deaths took place in the community while less than 1.0% were related to disasters or while using water transportation. Over three-quarters of drowning deaths occurred in ponds and ditches (Figure 1a), and over half were in outdoor water bodies primarily used for bathing and washing (56.0%) (Figure 1b).

**INSERT FIGURE 1**

1  
2  
3 Drowning occurred throughout the year, however fatalities peaked during the monsoon season  
4  
5 particularly in the months of June and September which accounted for nearly one quarter (23.7%) of  
6  
7 all drowning deaths (Figure 2).  
8  
9

#### 10 **INSERT FIGURE 2**

11  
12  
13 Almost all fatal drownings occurred between the daylight hours of 6 *a.m.* and 6 *p.m.* with two-thirds  
14  
15 (63.0%) taking place between the hours of 9 *a.m.* and 3 *p.m.* (Figure 3). Among children aged 1-4  
16  
17 years most fatal drownings occurred between the hours of 12 *p.m.* and 4 *p.m.* (58.0%) which was  
18  
19 followed by 8 *a.m.* to 12 *p.m.* (31.0%) (data not shown).  
20  
21  
22

#### 23 **INSERT FIGURE 3**

##### 24 ***Person accompanying prior to drowning event***

25  
26  
27 Almost two-thirds (62.3%) of drowned individuals were not accompanied by anyone during the  
28  
29 drowning incident, while 15.0% were accompanied by a friend or colleague (data not shown).  
30  
31  
32

##### 33 ***Individual involved in rescue***

34  
35  
36 During fatal drownings, neighbours or bystanders (43.0%) were the individuals most often involved in  
37  
38 the rescue, followed by mothers (21.2%).  
39  
40  
41

##### 42 ***Factors associated with fatal drowning***

43  
44  
45 Univariate analyses for fatal drowning showed that children aged 1 to 4 years had three times higher  
46  
47 odds of fatally drowning compared with those aged under one years. Similarly, households with four  
48  
49 or more children had almost two times higher odds of experiencing a drowning fatality than  
50  
51 households with one child. After adjustment, the factors that remained associated with fatal  
52  
53 drowning were age, with children aged 1 to 4 years at three times higher odds than those aged less  
54  
55 than one year. Being male also significantly increased the odds of drowning fatalities by almost  
56  
57  
58  
59  
60

70.0%. The number of children in the household was also significantly associated with fatal drowning and increased with increasing number of children (Table 3).

Table 3. Socio-demographic factors associated with drowning mortality

| Characteristic            | Univariate |      |      |         | Multivariable |       |       |         |
|---------------------------|------------|------|------|---------|---------------|-------|-------|---------|
|                           | OR         | LCL  | UCL  | p-value | OR            | LCL   | UCL   | p-value |
| <b>Sex</b>                |            |      |      |         |               |       |       |         |
| Male                      | 1.7        | 1.3  | 2.3  | 0.0004  | 1.7           | 1.2   | 2.3   | 0.0007  |
| Female                    | reference  |      |      |         | reference     |       |       |         |
| <b>Age group (years)</b>  |            |      |      |         |               |       |       |         |
| <1                        | reference  |      |      |         | reference     |       |       |         |
| 1-4                       | 3.0        | 1.4  | 6.3  | <.0001  | 3.0           | 1.4   | 6.4   | <.0001  |
| 5-9                       | 0.7        | 0.3  | 1.6  | .       | 0.7           | 0.3   | 1.5   | .       |
| 10-14                     | 0.2        | 0.1  | 0.6  | .       | 0.2           | 0.1   | 0.5   | .       |
| 15-17                     | 0.1        | 0.04 | 0.4  | .       | 0.1           | 0.03  | 0.3   | .       |
| 18-24                     | 0.2        | 0.08 | 0.5  | .       | 0.097         | 0.030 | 0.313 | .       |
| 25-39                     | 0.0        | 0.0  | 0.1  | .       | 0.0           | 0.0   | 0.09  | .       |
| 40-59                     | 0.1        | 0.0  | 0.2  | .       | 0.0           | 0.0   | 0.13  | .       |
| 60 +                      | 0.1        | 0.0  | 0.4  | .       | 0.1           | 0.0   | 0.2   | .       |
| <b>Maternal education</b> |            |      |      |         |               |       |       |         |
| None                      | 1.9        | 0.4  | 8.2  |         |               |       |       |         |
| 1 -5 years                | 2.8        | 0.7  | 11.4 | 0.3372  | .             | .     | .     | .       |
| 6-8 years                 | 2.5        | 0.6  | 10.6 | .       | .             | .     | .     | .       |
| 9-12 years                | 2.1        | 0.5  | 8.8  | .       | .             | .     | .     | .       |
| 13-17 years               | reference  |      |      |         | reference     |       |       |         |
| <b>Wealth quintile</b>    |            |      |      |         |               |       |       |         |
| Q1 (Lowest)               | 1.5        | 0.9  | 2.5  | 0.5147  | 1.3           | 0.8   | 2.2   | 0.8396  |
| Q2                        | 1.2        | 0.6  | 2.2  | .       | 1.1           | 0.6   | 2.0   | .       |
| Q3                        | 1.3        | 0.8  | 2.1  | .       | 1.2           | 0.7   | 1.9   | .       |

| Characteristic                       | Univariate |     |     |         | Multivariable |     |     |         |
|--------------------------------------|------------|-----|-----|---------|---------------|-----|-----|---------|
|                                      | OR         | LCL | UCL | p-value | OR            | LCL | UCL | p-value |
| Q4                                   | 1.2        | 0.6 | 2.1 | .       | 1.1           | 0.6 | 2.0 | .       |
| Q5 (Highest)                         | reference  |     |     |         | reference     |     |     |         |
| <b>No. of children in household*</b> |            |     |     |         |               |     |     |         |
| 1 child                              | reference  |     |     |         | reference     |     |     |         |
| 2 children                           | 0.9        | 0.6 | 1.4 | 0.6273  | 0.9           | 0.6 | 1.5 | 0.0026  |
| 3 children                           | 1.0        | 0.6 | 1.5 | .       | 1.2           | 0.8 | 1.8 | .       |
| 4 children                           | 1.3        | 0.8 | 2.1 | .       | 1.8           | 1.1 | 2.9 | .       |
| 5+ children                          | 1.4        | 0.8 | 2.4 | .       | 2.1           | 1.2 | 3.7 | .       |

\*Number of household with no children were very small to draw plausible inference

95% CI's

## DISCUSSION

The mortality and morbidity reporting systems in Bangladesh are poor<sup>[17]</sup>. To inform a large-scale drowning prevention strategy, we conducted a cross-sectional household survey to provide otherwise unavailable epidemiological data on drowning in the Barishal Division. Our study found a mortality rate from drowning of 37.9 per 100,000 per year across all ages in the Barishal division, which is more than three times greater than the national rate reported in 2016 (11.7/100,000/year)<sup>[4]</sup>. The number of water bodies, including rivers, lakes, ponds and ditches in this division is far higher than in other parts of the country. For both males and females fatal drowning rates were high in infancy, and peaked at 1-4 years of age, then fell rapidly through middle childhood and adolescence and remained relatively low throughout adulthood. This pattern of fatal drowning rates across the age groups in this study is consistent with another recent national survey<sup>[4]</sup>.

1  
2  
3 Previous studies identified nearby ponds, ditches, and canals as the most common location of fatal  
4 drowning among children in Bangladesh<sup>[3, 17-20]</sup>. In the Barishal region, most households are  
5 surrounded by water bodies. Similar to previous studies, this study revealed that the majority of  
6 childhood drowning deaths occurred in ponds, ditches and canals situated within only 100 metres of  
7 their residences. Children were often with other siblings (children) or unaccompanied at the time of  
8 drowning. Lack of supervision in younger children is a major risk factor. Attentiveness and continuity  
9 are essential characteristics of the hierarchical model of supervision<sup>[21]</sup>. Proximity to the water  
10 exacerbates risk, however, among adults a considerable proportion of drowning fatalities occurred  
11 at a distance of two kilometres from their houses. It is possible that these deaths occurred in rivers  
12 where individuals were engaged in activities such as fishing or boating.  
13  
14

15  
16 Drowning deaths in Barishal occurred year-round but most frequently during the monsoon season  
17 (June to October); this is similar to findings reported in prior studies<sup>[18, 22-24]</sup>. It is also notable that in  
18 the dry season (November-December) the fatal drowning rates remained relatively high in Barishal.  
19 This is likely because most natural water bodies including those close to households are tidal and are  
20 subject to two high tides each day. This can increase the risk of exposure especially among children  
21 playing in water bodies. Previous studies, have also reported over 90% of fatal drowning events  
22 occurred in daylight hours<sup>[17, 25]</sup>.  
23  
24

25  
26 Fatal drowning was strongly and significantly associated with sex with males having over 1.5 times  
27 the odds of death from drowning. This may be related to male's greater propensity for risk taking  
28 behaviours and increased exposure to high risk situations<sup>[26]</sup>. It may also reflect existing traditional  
29 gender roles in Bangladesh with young boys more likely to be out playing unsupervised whereas girls  
30 would be at home helping with household activities. This points to the need to place specific  
31 emphasis on targeting boys within drowning prevention programs. Age was also significantly related  
32 to fatal drowning with those in the age group of 1-4 years having the greatest risk of drowning. This  
33 age group has consistently been found to be at greater risk of drowning in Bangladesh and other  
34  
35  
36  
37  
38  
39  
40  
41  
42  
43  
44  
45  
46  
47  
48  
49  
50  
51  
52  
53  
54  
55  
56  
57  
58  
59  
60

1  
2  
3 South-East Asian and Western Pacific countries<sup>[2, 18, 27]</sup> and may be related to challenges to achieve  
4 adult supervision, the inability to swim in this age group and other behavioural factors<sup>[18]</sup>. We did not  
5 find any significant association between the level of mother's education and fatal drowning risk. The  
6 socio-economic status of our study population was fairly homogenous and no associations were  
7 reported across the socio-economic groups. A higher number of children in the household, increased  
8 the risk of drowning events. Households with four or five children in the family were common place.  
9 In these circumstances parents may find it difficult to adequately supervise all of them. These  
10 findings support the need for programmes that can assist families with supervision.  
11  
12  
13  
14  
15  
16  
17  
18  
19  
20  
21  
22  
23  
24

#### 25 **STRENGTHS AND LIMITATIONS OF THE STUDY**

26  
27 The study was strengthened by steps taken to ensure the data quality of data. Field supervisors were  
28 recruited and trained, and they observed 10.0% of interviews conducted by the data collectors. They  
29 also checked 10.0% of the collected data, and re-interviewed 2.0% of the households. In addition,  
30 field level research officers and managers were appointed to re-check all data for inconsistencies. If  
31 inconsistency was detected, the respective data collector was asked to revisit the household to  
32 collect correct information.  
33  
34  
35  
36  
37  
38  
39  
40

41 Another strength was that the study used external cause codes of fatal drowning from the ICD – 10  
42 that provided a more representative data on the true burden of fatal drowning. In addition to  
43 unintentional external cause of drowning codes, watercraft and flood related drowning, and  
44 intentional self-harm by drowning codes were also included. Studies have suggested to include these  
45 later codes (drowning from watercraft, flood related and intentional self-harm) to obtain more  
46 representative magnitude of fatal drowning <sup>[28, 29]</sup>. Intentional drownings particularly suicides are  
47 culturally stigmatised in Bangladesh. Household surveys thus are not the best source of data for  
48 determining intent of drowning. However, given the high burden among children, intent has little  
49 implications on the study findings.  
50  
51  
52  
53  
54  
55  
56  
57  
58  
59  
60

1  
2  
3  
4  
5  
6 Given that the mortality burden is highest in children aged under five years, it should be noted that  
7  
8 under-reporting in overall mortality rates is an issue in this age group because of poor birth /vital  
9  
10 registration systems, so our results may have under-estimated the true burden. This is likely to affect  
11  
12 data on children aged under-one year to a greater extent. However, given that a two-year recall  
13  
14 period was used in this survey, the fatal drowning rates are likely to be conservative. Although the  
15  
16 proportion of refusals was small (2%), collecting data on reasons for non-participation could have  
17  
18 added to the strength of the study.  
19  
20

21  
22 One of the major challenges in this study was to use the electronic data capturing system with an  
23  
24 intent to review and manage data as the survey progressed. Each data collector was given a tablet  
25  
26 loaded with REDCap application, and a sim was inserted in the device to obtain wireless internet  
27  
28 connection. However, in the remote locations the internet connectivity was very poor and initially  
29  
30 the data collectors could not upload their collected data from the site of data collection. To resolve  
31  
32 this issue, an offline data collection system was created in the software. Each day after data  
33  
34 collection in the afternoon the data collectors returned to their field office to get a high quality Wifi  
35  
36 connection to upload their data. To the best of our knowledge, this is the first survey using an offline  
37  
38 application for electronic data capture (Redcap), in the region. The survey was huge with over 250  
39  
40 variables collecting information on multiple drowning events in each household. With English and  
41  
42 Bangla translations, the screen size of a hand held Android device posed challenge for accuracy in  
43  
44 data entry, which was mitigated by division of the survey into multiple sections/tools and optimising  
45  
46 the font size. Bi-lingual presentation was essential, as statistical programmes are primarily  
47  
48 compatible with English, only.  
49  
50  
51  
52  
53

54 The environmental context presented issues that needed consideration, for example access to  
55  
56 electricity for charging of devices, access to internet or recharging the power banks. Some of these  
57  
58 learnings that have since led to enhanced features within the Redcap application including:  
59  
60

1  
2  
3 synchronising of auto-generated identification on an offline application, preventing data loss or the  
4  
5 duplication of data. It was due to the success of using electronic data capture and utilising internal  
6  
7 validity checks that the high quality and completeness of the dataset was achieved.  
8  
9

10 The survey was purposively conducted in Barishal division which is one of the eight divisions of  
11  
12 Bangladesh. In previous national injury surveys the highest drowning mortality rate among children  
13  
14 was observed in the Pirojpur district of Barishal division<sup>[3]</sup>. Considering this high rate the Barishal  
15  
16 division was selected for Project Bhasa.  
17  
18

## 19 20 **CONCLUSION**

21  
22 The study findings highlight the very high magnitude of drowning deaths in the Barishal division.  
23  
24 Socio-demographic factors including being male, aged 1-4 years and having five or more children in  
25  
26 households was associated with increased risk of fatal drowning. The findings further demonstrate  
27  
28 that drowning is predominantly a problem that affects children in Bangladesh. The Barishal division  
29  
30 demands urgent interventions targeted at high risk groups identified here. Project Bhasa aims to  
31  
32 provide evidence-based interventions, including community day-care for under-five children to  
33  
34 ensure adult supervision during day time and the provision of swimming instruction and school  
35  
36 water safety education to children aged five years and over, to reduce drowning. It is expected that  
37  
38 the project will generate knowledge to assist with drowning reduction efforts both nationally and in  
39  
40 other similar settings.  
41  
42  
43  
44  
45  
46  
47  
48

## 49 50 **ACKNOWLEDGEMENTS**

51  
52 This research was a part of Project *Bhasa* - a Comprehensive Drowning Reduction Strategy. We  
53  
54 thank Royal National Lifeboat Institution (RNLI) UK, The George Institute for Global Health (TGI),  
55  
56 Australia and the Directorate General of Health Services (DGHS), Ministry of Health and Family  
57  
58 Welfare (MoHFW), Government of the People's Republic of Bangladesh for their support in the  
59  
60 study. We gratefully acknowledge Professor AHM Enayet Hussain, Additional Director General,



1  
2  
3 DGHS, MoHFW to Chair the National Steering Committee for the Project *Bhasa* and also for  
4 providing all necessary administrative support to accomplish the baseline survey. We also would like  
5 to thank Steve Wills and Ashim Kumar Saha for their contribution during data collection.  
6  
7  
8  
9

## 10 11 **CONTRIBUTORS**

12  
13  
14 AR participated in the design, implementation and supervision of field work and analysis and wrote  
15 the paper. JJ contributed on project design, data analysis and writing of the paper. KB and MJH  
16 contributed on project design, implementation, Data management and supervision of field work and  
17 writing of the paper. DR contributed on project design and writing of the paper. TA and KR were  
18 involved in data management and analysis and contributed to write the paper. RI and FR conceived  
19 the study and supervised throughout and contributed to the writing of the paper. RI and FR are the  
20 guarantors.  
21  
22  
23  
24  
25

## 26 27 **FUNDING**

28  
29 The research was funded by Royal National Lifeboat Institution (RNLI), UK. One of the co-authors of  
30 this paper, Dan Ryan, works for the RNLI. He contributed in designing the study and was also  
31 involved in writing the manuscript.  
32  
33  
34  
35

## 36 37 **COMPETING INTERESTS**

38  
39 Competing interests or state 'None declared': None declared.  
40  
41

## 42 43 **ETHICAL APPROVAL**

44  
45 Obtained  
46  
47

## 48 49 **PROVENANCE AND PEER REVIEW**

50  
51 Not commissioned; externally peer reviewed.  
52  
53

## 54 55 **DATA SHARING STATEMENT**

56  
57 We have de-identified data which are available at Centre for Injury Prevention and Research,  
58 Bangladesh and The George Institute for Global Health. This was the baseline survey data generated  
59  
60

1  
2  
3 from BHASA project which is a collaborative work of Royal National Lifeboat Institution, Centre for  
4 Injury Prevention and Research, Bangladesh and The George Institute for Global Health. Royal  
5 National Lifeboat Institution funded to conduct the research work. The mentioned organisations  
6  
7  
8 have rights to use the data. Data are available upon request to Dr Aminur Rahman  
9  
10  
11 (aminur@ciprb.org) and Dr. Jagnoor Jagnoor (jjagnoor@georgeinstitute.org.au).  
12  
13  
14

15 Figure 1: *Distribution of fatal drowning by type of water bodies (1a) and their use (1b)*

16  
17  
18 Figure 2: *Distribution of fatal drowning by time of the year in Barishal Division, Bangladesh*

19  
20  
21 Figure 3: *Distribution of fatal drowning by time of the day in Barishal Division, Bangladesh*  
22  
23  
24  
25

## 26 REFERENCES

- 27  
28  
29  
30  
31 1. World Health Organisation, *Global Health Estimates 2016: Deaths by Cause, Age, Sex, by*  
32 *Country and by Region, 2000-2016*. 2016, World Health Organization: Geneva, Switzerland.
- 33  
34 2. World Health Organisation, *Global report on drowning: preventing a leading killer*. 2014, The  
35 World Health Organisation (WHO): Geneva, Switzerland.
- 36  
37 3. Rahman, A., et al., *Bangladesh Health and Injury Survey Report on Children*. 2005, Directorate  
38 General of Health Services (DGHS), Ministry of Health & Family Welfare (MOHFW),  
39 Government of the People's Republic of Bangladesh, Institute of Child & Mother Health  
40 (ICMH), United Nations Children's Fund (UNICEF), The Alliance for Safe Children (TASC):  
41 Dhaka, Bangladesh.
- 42  
43 4. Rahman, A. et al. *Bangladesh Health and Injury Survey 2016*. Directorate General of Health  
44 Services (DGHS), Ministry of Health & Family Welfare (MOHFW), Government of the People's  
45 Republic of Bangladesh, Centre for Injury Prevention and Research, Bangladesh: Dhaka,  
46 Bangladesh  
47  
48
- 49 5. NIPORT, Mitra and Associates, and ICF International, *Bangladesh Demographic and Health*  
50 *Survey 2011* 2013, NIPORT, Mitra and Associates, and ICF International: Dhaka, Bangladesh  
51 and Calverton, Maryland, USA.
- 52  
53 6. UNU-EHS and Bündnis Entwicklung Hilft, *World Risk Report 2015*. 2015, Bündnis Entwicklung  
54 Hilft (Alliance Development Works) and United Nations University – Institute for Environment  
55 and Human Security (UNU-EHS): Berlin.  
56  
57  
58  
59  
60

- 1
  - 2
  - 3
  - 4
  - 5
  - 6
  - 7
  - 8
  - 9
  - 10
  - 11
  - 12
  - 13
  - 14
  - 15
  - 16
  - 17
  - 18
  - 19
  - 20
  - 21
  - 22
  - 23
  - 24
  - 25
  - 26
  - 27
  - 28
  - 29
  - 30
  - 31
  - 32
  - 33
  - 34
  - 35
  - 36
  - 37
  - 38
  - 39
  - 40
  - 41
  - 42
  - 43
  - 44
  - 45
  - 46
  - 47
  - 48
  - 49
  - 50
  - 51
  - 52
  - 53
  - 54
  - 55
  - 56
  - 57
  - 58
  - 59
  - 60
7. Department of Disaster Management Bangladesh, *Disaster Report 2013*. 2015, Department of Disaster Management, Ministry of Disaster Management and Relief, Government of the People's Republic of Bangladesh: Dhaka, Bangladesh.
  8. Azad, A., *Riverine Passenger Vessel Disaster in Bangladesh : Options for Mitigation and Safety*. 2009, BRAC University: Dhaka, Bangladesh.
  9. IWM, *Policy Brief: Local Level Hazard Maps for Flood, Storm, Surge and Salinity*. 2014, Institute of Water Modelling (IWM): Dhaka, Bangladesh.
  10. Harris, D.R., Lemeshow, Stanley, *Evaluation of the EPI survey methodology for estimating relative risk*. World Health Stat Q, 1991. **44**(3): p. 107-14.
  11. World Health Organisation, *International Statistical Classification of Diseases and Related Health Problems 10th Revision (ICD-10)*. 2016, The World Health Organization: Geneva, Switzerland.
  12. van Beeck, E.F., et al., *A new definition of drowning: towards documentation and prevention of a global public health problem*. Bull World Health Organ, 2005. **83**(11): p. 853-6.
  13. Passmore, J.W., J.O. Smith, and A. Clapperton, *True burden of drowning: compiling data to meet the new definition*. International Journal of Injury Control and Safety Promotion, 2007. **14**(1): p. 1-3.
  14. Serina, P., et al., *What is the optimal recall period for verbal autopsies? Validation study based on repeat interviews in three populations*. Population Health Metrics, 2016. **14**(40).
  15. Harris, P., et al., *Research Electronic Data Capture (REDCap) - A metadata driven methodology and workflow process for providing translational research informatic support*. J Biomed Inform., 2009. **42**(2): p. 377-81.
  16. Bangladesh Bureau of Statistics, *Bangladesh Statistics 2017*. 2017, Ministry of Planning: Dhaka.
  17. Rahman, A., et al., *Epidemiology of Drowning in Bangladesh: An Update*. Int J Environ Res Public Health, 2017. **14**(5): p. 1-11.
  18. Rahman, A., et al., *Analysis of the childhood fatal drowning situation in Bangladesh: exploring prevention measures for low-income countries*. Inj Prev, 2009. **15**(2): p. 75-9.
  19. Ahmed, M.K., M. Rahman, and J. van Ginneken, *Epidemiology of child deaths due to drowning in Matlab, Bangladesh*. Int J Epidemiol, 1999. **28**(2): p. 306-11.
  20. Hyder, A.A., et al., *Death from drowning: defining a new challenge for child survival in Bangladesh*. Inj Control Saf Promot, 2003. **10**(4): p. 205-10.
  21. Saluja, G., et al., *The role of supervision in child injury risk: definition, conceptual and measurement issues*. Inj. Control Saf. Promot., 2004. **11**: p. 17-22.
  22. Rahman, F., et al., *Cost-effectiveness of an injury and drowning prevention program in Bangladesh*. Pediatrics, 2012. **130**(6): p. e1621-e1628.

- 1  
2  
3 23. Linnan, M., et al., *Child Mortality and Injury in Asia: Survey results and evidence*, in *Innocenti Working Paper 2007-06, Special Series on Child Injury No. 3*. 2007, UNICEF Innocenti Research Centre: Florence. p. 64-87.
- 7 24. Rahman F, Andersson R, and S. L., *Health Impact of Injuries: A Population-Based Epidemiological Investigation in a Local Community of Bangladesh*. *J Safety Res*, 1998. **29**(4): p. 213-22.
- 12 25. Hossain, M., et al., *Socio-demographic, environmental and caring risk factors for childhood drowning deaths in Bangladesh*. *BMC Pediatr*, 2015. **15**: p. 114.
- 15 26. Croft, J.L. and C. Button, *Interacting Factors Associated with Adult Male Drowning in New Zealand*. *PLoS One*, 2015. **10**(6): p. e0130545.
- 18 27. Yang, L., et al., *Risk factors for childhood drowning in rural regions of a developing country: a case-control study*. *Injury prevention*, 2007. **13**(3): p. 178-182.
- 21 28. Peden A.E., Franklin R.C., Mahony A.J., Scarr J., Barnsley P.D., *Using a retrospective cross-sectional study to analyse unintentional fatal drowning in Australia: ICD-10 coding based methodologies versus actual deaths*, *BMJ Open*, 2017;7:e019407. doi:10.1136/bmjopen-2017-019407
- 27 29. Cenderadewi M., Franklin R.C., Peden A.E., Devine S., *Pattern of intentional drowning mortality: a total population retrospective cohort study in Australia, 2006–2014*, *BMC Public Health*, 2019; 19:207. doi.org/10.1186/s12889-019-6476-z
- 31  
32  
33  
34  
35  
36  
37  
38  
39  
40  
41  
42  
43  
44  
45  
46  
47  
48  
49  
50  
51  
52  
53  
54  
55  
56  
57  
58  
59  
60

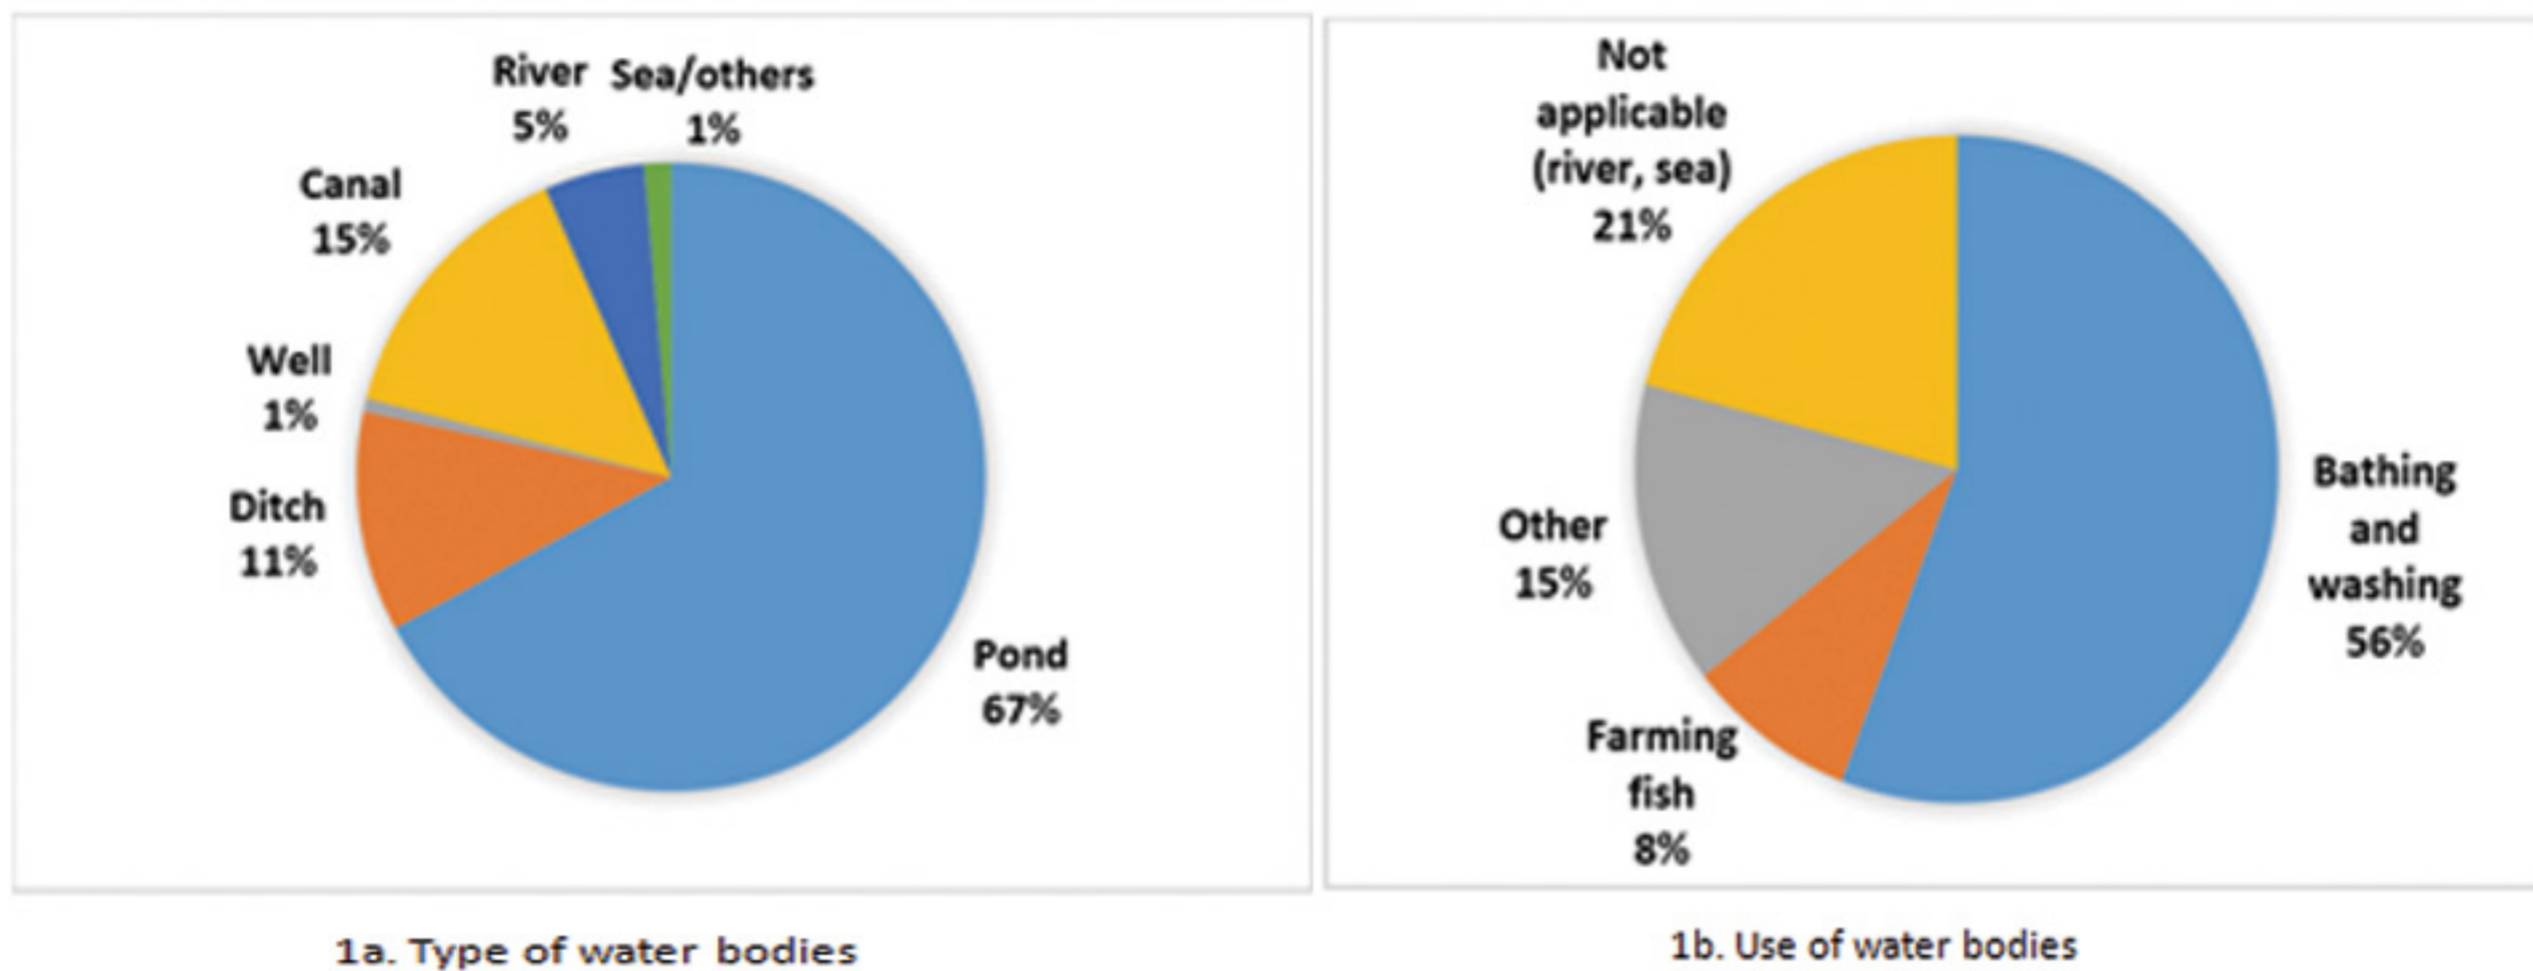

*Figure 1: Distribution of fatal drowning by type of water bodies (1a) and their use (1b)*

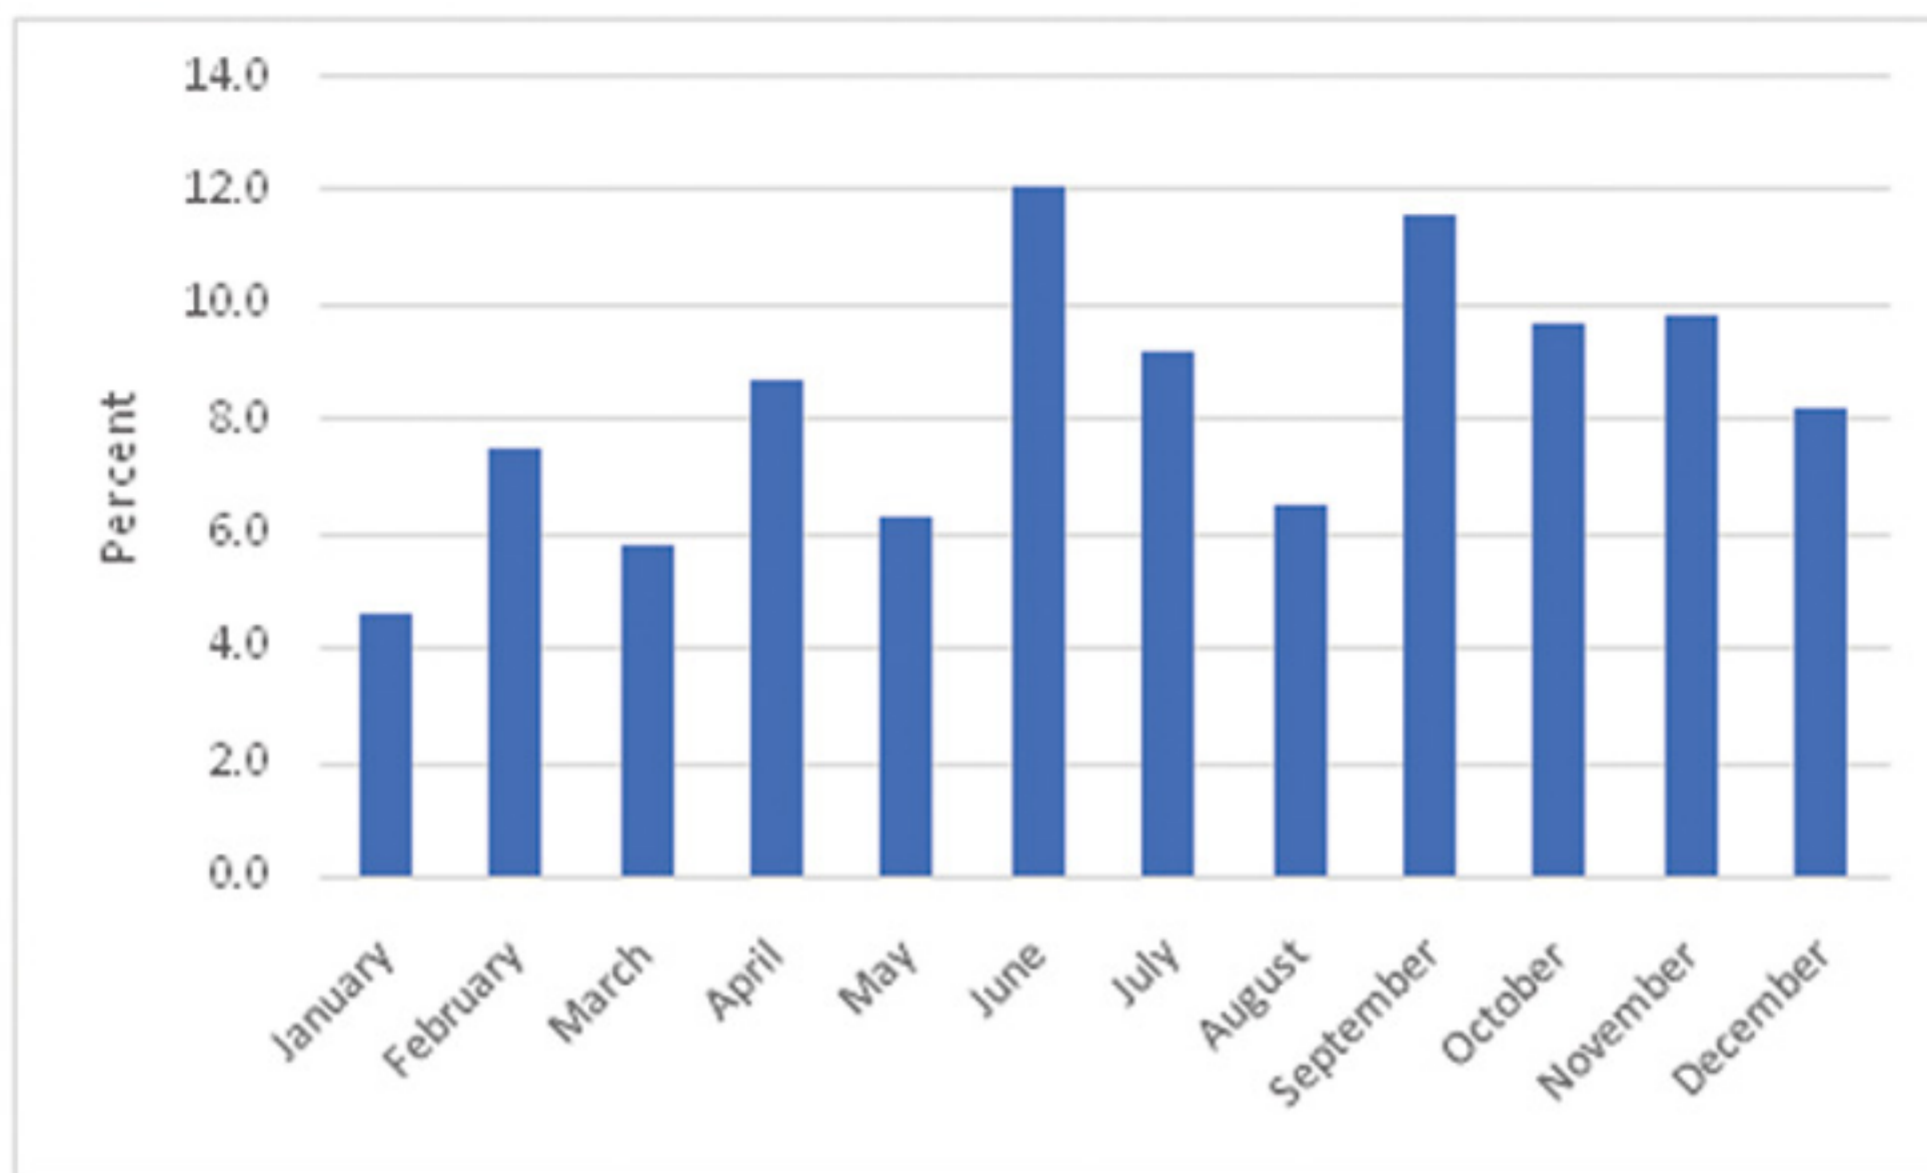

*Figure 2. Distribution of fatal drowning by time of the year in Barishal Division, Bangladesh*

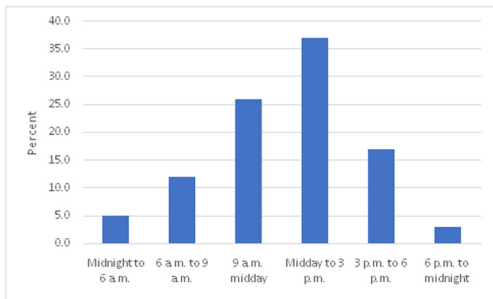

Figure 3. Distribution of fatal drowning by time of the day in Barishal Division, Bangladesh

## STROBE Statement

**Vulnerability to fatal drowning among the population in Southern Bangladesh: findings from a cross-sectional household survey**

|                           | Item No | Recommendation                                                                                                                                                                                    | Page and Line Number(s)    |
|---------------------------|---------|---------------------------------------------------------------------------------------------------------------------------------------------------------------------------------------------------|----------------------------|
| <b>Title and abstract</b> | 1       | (a) Indicate the study's design with a commonly used term in the title or the abstract                                                                                                            | P2, L13                    |
|                           |         | (b) Provide in the abstract an informative and balanced summary of what was done and what was found                                                                                               | P2, L13-38                 |
| <b>Introduction</b>       |         |                                                                                                                                                                                                   |                            |
| Background/rationale      | 2       | Explain the scientific background and rationale for the investigation being reported                                                                                                              | P5, L3-23                  |
| Objectives                | 3       | State specific objectives, including any pre-specified hypotheses                                                                                                                                 | P5, L15-22                 |
| <b>Methods</b>            |         |                                                                                                                                                                                                   |                            |
| Study design              | 4       | Present key elements of study design early in the paper                                                                                                                                           | P5, L36-45                 |
| Setting                   | 5       | Describe the setting, locations, and relevant dates, including periods of recruitment, exposure, follow-up, and data collection                                                                   | P5, L36-41                 |
| Participants              | 6       | (a) Give the eligibility criteria, and the sources and methods of selection of participants                                                                                                       | P5, L40-43<br>P6, L39-43   |
| Variables                 | 7       | Clearly define all outcomes, exposures, predictors, potential confounders, and effect modifiers. Give diagnostic criteria, if applicable                                                          | P6, L3-31                  |
| Data sources/measurement  | 8*      | For each variable of interest, give sources of data and details of methods of assessment (measurement). Describe comparability of assessment methods if there is more than one group              | P5, L51-54<br>P6, L37-38   |
| Bias                      | 9       | Describe any efforts to address potential sources of bias                                                                                                                                         | P6, L57-60                 |
| Study size                | 10      | Explain how the study size was arrived at                                                                                                                                                         | P5, L40-45                 |
| Quantitative variables    | 11      | Explain how quantitative variables were handled in the analyses. If applicable, describe which groupings were chosen and why                                                                      | P7, L12-21                 |
| Statistical methods       | 12      | (a) Describe all statistical methods, including those used to control for confounding                                                                                                             | P7, L12-21                 |
|                           |         | (b) Describe any methods used to examine subgroups and interactions                                                                                                                               | P7, L3-8                   |
|                           |         | (c) Explain how missing data were addressed                                                                                                                                                       | P6, L44-47<br>P7, L22      |
|                           |         | (d) If applicable, describe analytical methods taking account of sampling strategy                                                                                                                | P7, L12-17                 |
|                           |         | (e) Describe any sensitivity analyses                                                                                                                                                             | N/A                        |
| <b>Results</b>            |         |                                                                                                                                                                                                   |                            |
| Participants              | 13*     | (a) Report numbers of individuals at each stage of study—eg numbers potentially eligible, examined for eligibility, confirmed eligible, included in the study, completing follow-up, and analysed | P7, L45-55                 |
|                           |         | (b) Give reasons for non-participation at each stage                                                                                                                                              | Not provided, less than 5% |
|                           |         | (c) Consider use of a flow diagram                                                                                                                                                                | N/A                        |



|                          |     |                                                                                                                                                                                                              |                                                                                                  |
|--------------------------|-----|--------------------------------------------------------------------------------------------------------------------------------------------------------------------------------------------------------------|--------------------------------------------------------------------------------------------------|
| Descriptive data         | 14* | (a) Give characteristics of study participants (eg demographic, clinical, social) and information on exposures and potential confounders                                                                     | P7, L47-53                                                                                       |
|                          |     | (b) Indicate number of participants with missing data for each variable of interest                                                                                                                          | P7, L21-22                                                                                       |
| Outcome data             | 15* | Report numbers of outcome events or summary measures                                                                                                                                                         | P7, L52-55                                                                                       |
| Main results             | 16  | (a) Give unadjusted estimates and, if applicable, confounder-adjusted estimates and their precision (eg, 95% confidence interval). Make clear which confounders were adjusted for and why they were included | P8, L31-56                                                                                       |
|                          |     | (b) Report category boundaries when continuous variables were categorized                                                                                                                                    | N/A                                                                                              |
|                          |     | (c) If relevant, consider translating estimates of relative risk into absolute risk for a meaningful time period                                                                                             | N/A                                                                                              |
| Other analyses           | 17  | Report other analyses done—eg analyses of subgroups and interactions, and sensitivity analyses                                                                                                               | P9, L11-3-<br>P9, L32-49<br>P9, L54-59<br>P10, L6-13<br>P10, L21-29<br>P10, L34-50<br>P11, L7-50 |
| <b>Discussion</b>        |     |                                                                                                                                                                                                              |                                                                                                  |
| Key results              | 18  | Summarise key results with reference to study objectives                                                                                                                                                     | P12, 9-30                                                                                        |
| Limitations              | 19  | Discuss limitations of the study, taking into account sources of potential bias or imprecision. Discuss both direction and magnitude of any potential bias                                                   | P14, L10-20                                                                                      |
| Interpretation           | 20  | Give a cautious overall interpretation of results considering objectives, limitations, multiplicity of analyses, results from similar studies, and other relevant evidence                                   | P13, L17-51                                                                                      |
| Generalisability         | 21  | Discuss the generalisability (external validity) of the study results                                                                                                                                        | P14, L47-52                                                                                      |
| <b>Other information</b> |     |                                                                                                                                                                                                              |                                                                                                  |
| Funding                  | 22  | Give the source of funding and the role of the funders for the present study and, if applicable, for the original study on which the present article is based                                                | P15, L43                                                                                         |

\*Give information separately for exposed and unexposed groups.

**Note:** An Explanation and Elaboration article discusses each checklist item and gives methodological background and published examples of transparent reporting. The STROBE checklist is best used in conjunction with this article (freely available on the Web sites of PLoS Medicine at <http://www.plosmedicine.org/>, Annals of Internal Medicine at <http://www.annals.org/>, and Epidemiology at <http://www.epidem.com/>). Information on the STROBE Initiative is available at [www.strobe-statement.org](http://www.strobe-statement.org).
